# Supplementary material for: Learning From Biological and Computational Machines: Importance of SARS-CoV-2 Genomic Surveillance, Mutations and Risk Stratification
Source: Front Cell Infect Microbiol. 2021 Dec 24;11:783961. doi: 10.3389/fcimb.2021.783961 (PMC8762993; doi:10.3389/fcimb.2021.783961)
Supplement: Supplementary file 2 [file Table_1.xlsx]

## Sheet: All Patients
Patient ID	Age	Gender	Resident Area	Travel History	Sample Specimen	Collection Date	Symptoms Presented	Temp	SPO2	Medicine Administered	Contact to NCOVID Patient	Co-morbid Condition	Hospital stay in days	Respiratory Support	Status	Outcome	Respiratory rate(breaths per minute)	BMI	O2 supplementation required	Ventilatory support required	qSOFA SCORE	RESPIRATORY FINDINGS	HEMOGLOBIN	TLC COUNT	PLATELET COUNT	RANDOM BLOOD SUGAR	UREA	CREATININE	SODIUM	POTASSIUM	CHLORIDE	TOTAL BILIRUBIN	DIRECT BILIRUBIN	SGOT	SGPT	TOTALPROTEINS	ALBUMIN	ALKALINE PHOSPHATASE	LACTATE DEHYDROGENASE4	C-REACTIVE PROTEINS	ERYTHROCYTE SEDIMENTATION RATE	PRO-CALCITONIN	D-DIMER	IL-6	SERUM FERRITIN	ECG	CXR	CORADS SCORE ON HRCT	PLASMA THERAPY
IGIB1040201013	53	male	Maharashtra	no	Nasopharyngeal swab	1970-01-01	fever, cough,breathlessness	96.8	99	METHYLPREDNISOLONE, Low molecular weight heparin, Hydroxychloroquine, FABIFLU, REMDESIVIR, IVERMECTIN, ANTIBIOTICS, VITAMIN C, ZINC, VITAMIN D, VITAMIN A	yes	no	18	Yes	NA	NA	20	22.5	yes	no	0	Basal crepitations	15.9	6200	127000	121	47.5	1.3	143	4.8	108	0.5	0.2	81.3	70	5.9	3.8	44.1	933	58.1	8	NA	98	NA	NA	sinus rhythm	normal	4	No
IGIB1040201014	26	female	Maharashtra	no	Nasopharyngeal swab	1970-01-01	asymptomatic	98.7	98	METHYLPREDNISOLONE, Low molecular weight heparin, Hydroxychloroquine, FABIFLU, IVERMECTIN, ANTIBIOTICS, VITAMIN C, ZINC, VITAMIN D, VITAMIN A	yes	no	NA	No	NA	NA	16	25.7	no	no	0	Basal crepitations	13.4	4140	188000	96	21.8	1	148	4.1	108	0.3	0.1	22.2	14.8	6.6	3.9	58.5	467	3.66	NA	NA	0.2	NA	NA	sinus rhythm	normal	0	No
IGIB1040201015	28	male	Maharashtra	no	Nasopharyngeal swab	1970-01-01	asymptomatic	98.4	98	METHYLPREDNISOLONE, Low molecular weight heparin, Hydroxychloroquine, FABIFLU, IVERMECTIN, ANTIBIOTICS, VITAMIN C, ZINC, VITAMIN D, VITAMIN A	yes	no	11	No	NA	NA	16	22.2	no	no	0	Basal crepitations	15.9	4680	231000	102	18.3	5800	159000	18.1	1.1	0.8	0.3	19.3	12.8	7	4.2	86	499	10.17	4	0.2	0.35	NA	NA	sinus rhythm	normal	0	No
IGIB1040201016	73	male	Maharashtra	no	Nasopharyngeal swab	1970-01-01	fever, cough,breathlessness	98	98	METHYLPREDNISOLONE, Low molecular weight heparin, Hydroxychloroquine, FABIFLU, REMDESIVIR, IVERMECTIN, ANTIBIOTICS, VITAMIN C, ZINC, VITAMIN D, VITAMIN A	yes	no	14	Yes	NA	DEATH	26	21.5	yes	Non-invasive ventilation	1	Basal crepitations	13.2	5200	234000	119	36.6	0.9	140	4.2	104	2.4	1.2	59	47.9	6.3	3.7	120	94.9	168.9	NA	NA	NA	63.31	NA	sinus rhythm	normal	5	No
IGIB1040201060	49	male	Maharashtra	no	Nasopharyngeal swab	1970-01-01	fever,cough	101	98	METHYLPREDNISOLONE, Low molecular weight heparin, Hydroxychloroquine, FABIFLU, REMDESIVIR, IVERMECTIN, ANTIBIOTICS, VITAMIN C, ZINC, VITAMIN D, VITAMIN A	yes	Psychiatric disorder	1	No	NA	NA	20	27.4	no	no	0	no any	13.7	9500	321000	92	22	0.9	124	3.8	92	4.2	2.1	44.6	55.5	5.9	3.1	177	456	164	8	NA	350.55	4.33	NA	sinus rhythm	normal	5	No
IGIB1040201066	85	male	Maharashtra	no	Nasopharyngeal swab	1970-01-01	fever, breathlessness	99.6	97	METHYLPREDNISOLONE, Low molecular weight heparin, Hydroxychloroquine, FABIFLU, REMDESIVIR, IVERMECTIN, ANTIBIOTICS, VITAMIN C, ZINC, VITAMIN D, VITAMIN A	yes	Diabetes mellitus	NA	Yes	NA	NA	26	20.3	yes	no	1	Basal crepitations	13.1	7400	287000	396	104.1	1.3	148	4	110	0.3	0.1	53.4	51.7	6.6	3.6	68	402	13.2	8	NA	1199.2	NA	NA	sinus rhythm	normal	5	No
IGIB1040201103	45	male	Maharashtra	no	Nasopharyngeal swab	1970-01-01	fever, cough,breathlessness	99.3	98	METHYLPREDNISOLONE, Low molecular weight heparin, Hydroxychloroquine, FABIFLU, REMDESIVIR, TOCILIZUMAB, IVERMECTIN, ANTIBIOTICS, VITAMIN C, ZINC, VITAMIN D, VITAMIN A	yes	no	8	Yes	NA	NA	24	23.4	yes	no	0	Basal crepitations	10.8	19900	216000	112	48.9	1.2	144	5.8	112	2.7	1.7	42.4	60.5	5.7	3.3	98.2	299	124	6	3.08	1056	1767	NA	sinus rhythm	normal	5	No
IGIB1040201138	35	male	Maharashtra	no	Nasopharyngeal swab	1970-01-01	anosmia	97.3	98	METHYLPREDNISOLONE, Low molecular weight heparin, Hydroxychloroquine, FABIFLU, IVERMECTIN, ANTIBIOTICS, VITAMIN C, ZINC, VITAMIN D, VITAMIN A	yes	no	NA	Yes	NA	NA	16	22.1	no	no	0	no any	12.3	3800	201000	131	25.9	0.3	142	5.2	105	0.8	0.4	43.2	32.1	5.4	3.2	56.5	NA	16.9	NA	NA	NA	NA	NA	sinus rhythm	normal	NA	No
IGIB1040201144	65	female	Maharashtra	no	Nasopharyngeal swab	1970-01-01	breathlessness and cough	98	99	METHYLPREDNISOLONE, Low molecular weight heparin, Hydroxychloroquine, FABIFLU, REMDESIVIR, IVERMECTIN, ANTIBIOTICS, VITAMIN C, ZINC, VITAMIN D, VITAMIN A	no	Diabetes mellitus	NA	Yes	NA	NA	20	24.6	yes	no	0	Basal crepitations	10.5	8900	288000	332	125.9	1.5	145	4.6	112	0.5	0.2	32.7	30	6.2	4	45.6	NA	34	NA	NA	NA	NA	NA	sinus rhythm	normal	5	No
IGIB1040201160	61	female	Maharashtra	no	Nasopharyngeal swab	1970-01-01	asymptomatic	98.6	98	METHYLPREDNISOLONE, Low molecular weight heparin, Hydroxychloroquine, FABIFLU, IVERMECTIN, ANTIBIOTICS, VITAMIN C, ZINC, VITAMIN D, VITAMIN A	no	Diabetes mellitus,Hypertension	NA	No	NA	NA	16	25.4	no	no	0	no any	13.8	3500	134000	432	17.1	1.1	140	4.4	107	0.5	0.2	36.4	23.8	7.2	4	107.9	NA	0.7	NA	NA	NA	NA	NA	sinus rhythm	normal	NA	No
IGIB1040201214	56	male	Maharashtra	no	Nasopharyngeal swab	1970-01-01	asymptomatic	97.6	98	METHYLPREDNISOLONE, Low molecular weight heparin, Hydroxychloroquine, FABIFLU, IVERMECTIN, ANTIBIOTICS, VITAMIN C, ZINC, VITAMIN D, VITAMIN A	yes	Diabetes mellitus,Hypertension	NA	No	NA	NA	15	23.5	no	no	0	no any	12.5	4100	189000	198	18.6	1.1	139	4.2	103	0.3	0.1	34.5	26.9	6	3.5	45.3	NA	0.5	NA	NA	NA	NA	NA	sinus rhythm	normal	NA	No
IGIB1040201215	18	male	Maharashtra	no	Nasopharyngeal swab	1970-01-01	asymptomatic	96.7	98	METHYLPREDNISOLONE, Low molecular weight heparin, Hydroxychloroquine, FABIFLU, IVERMECTIN, ANTIBIOTICS, VITAMIN C, ZINC, VITAMIN D, VITAMIN A	no	no	12	No	NA	NA	16	22.3	no	no	0	Basal crepitations	15.9	5200	210000	98	26	0.9	134	4	107	0.5	0.3	38.6	56.9	7	4.3	111	NA	2.3	NA	NA	NA	NA	NA	sinus rhythm	normal	3	No
IGIB1040201216	76	female	Maharashtra	no	Nasopharyngeal swab	1970-01-01	breathlessness	98.4	97	METHYLPREDNISOLONE, Low molecular weight heparin, Hydroxychloroquine, FABIFLU, IVERMECTIN, ANTIBIOTICS, VITAMIN C, ZINC, VITAMIN D, VITAMIN A	no	Diabetes mellitus	NA	Yes	NA	NA	20	21.5	yes	no	0	Basal crepitations	13.2	2900	100000	316	17.6	0.8	144	4.1	108	0.3	0.1	20.2	16.1	6.2	3.5	92.5	NA	0.5	NA	NA	NA	NA	NA	sinus rhythm	normal	NA	No
IGIB1040201249	56	male	Maharashtra	no	Nasopharyngeal swab	1970-01-01	fever,cough	99.8	98	METHYLPREDNISOLONE, Low molecular weight heparin, Hydroxychloroquine, FABIFLU, REMDESIVIR, IVERMECTIN, ANTIBIOTICS, VITAMIN C, ZINC, VITAMIN D, VITAMIN A	no	Diabetes mellitus,Hypertension	4	Yes	NA	DAMA	20	23	yes	no	0	Basal crepitations	12.2	6500	362000	113	59.1	1.4	134	3.9	94	0.8	0.4	56.4	34.5	6.1	3.2	66.4	NA	56.7	NA	NA	NA	NA	NA	sinus rhythm	normal	5	No
IGIB1040201251	35	male	Maharashtra	yes	Nasopharyngeal swab	1970-01-01	fever, cough,breathlessness	100	95	NA	yes	NA	1	Yes	NA	DEATH	32	25.7	no	Non-invasive ventilation, Intubated	2	Basal crepitations	NA	NA	NA	NA	NA	NA	NA	NA	NA	NA	NA	NA	NA	NA	NA	NA	NA	NA	NA	NA	NA	NA	NA	sinus rhythm	normal	NA	No
IGIB1040201255	82	female	Maharashtra	no	Nasopharyngeal swab	1970-01-01	breathlessness and cough	98.1	98	METHYLPREDNISOLONE, Low molecular weight heparin, Hydroxychloroquine, FABIFLU, REMDESIVIR, IVERMECTIN, ANTIBIOTICS, VITAMIN C, ZINC, VITAMIN D, VITAMIN A	yes	Hypertension,Diabetes mellitus,Ischemic Heart Disease,Chronic kidney disease	3	Yes	NA	DEATH	30	22.4	no	Non-invasive ventilation	1	Basal crepitations	10.3	12900	155000	401	152	7.9	138	3.8	108	0.5	0.5	0.2	3.8	6	4	146.4	1023	134	8	NA	1044	NA	NA	sinus rhythm	normal	6	No
IGIB1040201264	73	female	Maharashtra	no	Nasopharyngeal swab	1970-01-01	breathlessness	97.3	99	METHYLPREDNISOLONE, Low molecular weight heparin, Hydroxychloroquine, FABIFLU, REMDESIVIR, IVERMECTIN, ANTIBIOTICS, VITAMIN C, ZINC, VITAMIN D, VITAMIN A	no	no	2	Yes	NA	DEATH	28	20.9	yes	no	1	Basal crepitations	15.6	12400	236000	102	95.9	2.5	146	5.4	115	0.6	0.2	52.3	33	6.6	3.6	88.6	NA	no	NA	NA	NA	NA	NA	sinus rhythm	normal	NA	No
IGIB1040201273	28	female	Maharashtra	no	Nasopharyngeal swab	1970-01-01	fever, anosmia	98.7	98	METHYLPREDNISOLONE, , Hydroxychloroquine, FABIFLU, IVERMECTIN, ANTIBIOTICS, VITAMIN C, ZINC, VITAMIN D, VITAMIN A	yes	no	NA	No	NA	NA	15	22.7	no	no	0	no any	14.5	6200	265000	88	15.4	0.8	144	3.9	106	0.4	0.1	22.9	15.1	7.2	4.2	82.6	NA	0.29	NA	NA	NA	NA	NA	sinus rhythm	normal	NA	No
IGIB1040201274	24	female	Maharashtra	no	Nasopharyngeal swab	1970-01-01	fever	100	99	METHYLPREDNISOLONE, Low molecular weight heparin, Hydroxychloroquine, FABIFLU, IVERMECTIN, ANTIBIOTICS, VITAMIN C, ZINC, VITAMIN D, VITAMIN A	yes	no	10	No	NA	DISCHARGE	14	22.3	no	no	1	no any	12.3	9000	287000	75	21.5	0.8	143	4	110	0.4	0.1	23.4	14.6	6	3.2	43.5	447.3	less than 0.50	2	NA	NA	NA	NA	sinus rhythm	normal	NA	No
IGIB1040201275	70	male	Maharashtra	no	Nasopharyngeal swab	1970-01-01	fever,cough	99.2	99	METHYLPREDNISOLONE, Low molecular weight heparin, Hydroxychloroquine, FABIFLU, REMDESIVIR, TOCILIZUMAB, IVERMECTIN, ANTIBIOTICS, VITAMIN C, ZINC, VITAMIN D, VITAMIN A	no	Hypertension	15	Yes	NA	DEATH	16	22.5	High-Flow Nasal Oxygen	Non-invasive ventilation	0	Basal crepitations	14.9	11700	123000	109	47.4	0.9	127	5.3	94	1.1	0.4	27.9	21.2	6.1	3.5	82.6	912.3	87.4	6	0.39	100	292.2	1907.29	sinus rhythm	normal	5	No
IGIB1040201280	47	male	Maharashtra	no	Nasopharyngeal swab	1970-01-01	fever,cough	98.6	98	METHYLPREDNISOLONE, Low molecular weight heparin, Hydroxychloroquine, FABIFLU, REMDESIVIR, , IVERMECTIN, ANTIBIOTICS, VITAMIN C, ZINC, VITAMIN D, VITAMIN A	no	no	NA	Yes	NA	NA	20	23.6	High-Flow Nasal Oxygen	Non-invasive ventilation	0	Basal crepitations	13.8	7600	280000	122	39	0.9	144	5.3	106	0.4	0.2	41.4	21.1	3.6	6.6	54.2	213	16.8	6	6.26	2386	157.2	NA	sinus rhythm	normal	NA	Yes
IGIB1040201358	58	female	Maharashtra	no	Nasopharyngeal swab	1970-01-01	asymptomatic	97.8	98	METHYLPREDNISOLONE, Low molecular weight heparin, Hydroxychloroquine, FABIFLU, IVERMECTIN, ANTIBIOTICS, VITAMIN C, ZINC, VITAMIN D, VITAMIN A	yes	no	NA	No	NA	DISCHARGE	16	23	no	no	0	no any	12.3	8700	342000	96	26.7	0.8	142	4.2	110	0.4	0.1	23.4	14.6	6	3.2	43.5	NA	less than 0.50	NA	NA	NA	NA	NA	sinus rhythm	normal	NA	No
IGIB1040201426	33	female	Maharashtra	no	Nasopharyngeal swab	1970-01-01	asymptomatic	96	98	METHYLPREDNISOLONE, Low molecular weight heparin, Hydroxychloroquine, FABIFLU, IVERMECTIN, ANTIBIOTICS, VITAMIN C, ZINC, VITAMIN D, VITAMIN A	yes	no	NA	No	NA	DISCHARGE	18	22.1	no	no	0	no any	13.6	6600	303000	105	18.8	0.7	155	3.9	125	0.7	0.2	38	28.8	6	3.4	49.2	NA	0.24	NA	NA	NA	NA	NA	sinus rhythm	normal	NA	No
IGIB1040201433	13	male	Maharashtra	no	Nasopharyngeal swab	1970-01-01	asymptomatic	97.3	100	METHYLPREDNISOLONE, Low molecular weight heparin, Hydroxychloroquine, FABIFLU, IVERMECTIN, ANTIBIOTICS, VITAMIN C, ZINC, VITAMIN D, VITAMIN A	yes	no	NA	No	NA	DISCHARGE	18	21.5	no	no	0	no any	13.9	7700	355000	87	18.2	0.7	143	4.3	109	0.6	0.2	38.6	26.4	5.6	3.2	45.4	NA	0.35	NA	NA	NA	NA	NA	sinus rhythm	normal	NA	No
IGIB1040201554	62	male	Maharashtra	no	Nasopharyngeal swab	1970-01-01	asymptomatic	97.1	99	Hydroxychloroquine, FABIFLU, ANTIBIOTICS, VITAMIN C, ZINC, VITAMIN D, VITAMIN A	no	no	11	No	NA	DISCHARGE	17	21.6	no	no	0	no any	16	11000	378000	205	24.6	0.8	134	4.6	111	0.6	0.4	32.4	28.7	5.8	3.4	45.3	NA	15.56	NA	NA	NA	NA	NA	sinus rhythm	normal	NA	No
IGIB1040201555	75	male	Maharashtra	yes	Nasopharyngeal swab	1970-01-01	fever, breathlessness	98.7	98	METHYLPREDNISOLONE, Low molecular weight heparin, Hydroxychloroquine, FABIFLU, IVERMECTIN, ANTIBIOTICS, VITAMIN C, ZINC, VITAMIN D, VITAMIN A	no	Hypertension	5	Yes	NA	DEATH	28	23.4	no	Non-invasive ventilation, Intubated	1	Basal crepitations	14	5900	199000	120	38.3	1.9	146	5.2	111	0.5	0.2	285	190	5.8	2.9	217	NA	160.2	NA	NA	NA	NA	NA	sinus rhythm	normal	5	No
IGIB1040201556	41	male	Maharashtra	no	Nasopharyngeal swab	1970-01-01	fever, anosmia	102	98	METHYLPREDNISOLONE, Low molecular weight heparin, Hydroxychloroquine, FABIFLU, IVERMECTIN, ANTIBIOTICS, VITAMIN C, ZINC, VITAMIN D, VITAMIN A	no	no	NA	Yes	NA	NA	18	24.5	yes	no	1	Basal crepitations	12.1	4400	170000	87	26.3	1.4	142	4.1	107	0.4	0.2	22.9	21	6.6	3.8	84.7	NA	98	NA	NA	NA	NA	NA	sinus rhythm	normal	4	No
IGIB1040201746	47	male	Maharashtra	no	Nasopharyngeal swab	1970-01-01	breathlessness & myalgia	96.7	97	METHYLPREDNISOLONE, Low molecular weight heparin, Hydroxychloroquine, FABIFLU, REMDESIVIR, IVERMECTIN, ANTIBIOTICS, VITAMIN C, ZINC, VITAMIN D, VITAMIN A	no	Diabetes mellitus,Hypertension	NA	Yes	NA	NA	24	23.5	yes	no	1	Basal crepitations	13.8	4000	125000	312	28.2	1.2	144	4.5	103	0.5	0.2	34.8	23.8	6.5	3.7	75.2	NA	54.4	NA	NA	NA	NA	NA	sinus rhythm	normal	NA	No
IGIB1040201829	75	female	Maharashtra	no	Nasopharyngeal swab	1970-01-01	breathlessness	98	98	METHYLPREDNISOLONE, Low molecular weight heparin, Hydroxychloroquine, FABIFLU, IVERMECTIN, ANTIBIOTICS, VITAMIN C, ZINC, VITAMIN D, VITAMIN A	yes	Diabetes mellitus	NA	Yes	NA	NA	26	21.1	yes	no	1	Basal crepitations	7.7	10800	132000	332	37.1	0.8	137	5.2	104	3.3	2.2	124	82	4.8	2.6	185	NA	64	NA	NA	NA	NA	NA	sinus rhythm	normal	NA	No
IGIB1040201877	42	male	Maharashtra	no	Nasopharyngeal swab	1970-01-01	asymptomatic	96.7	99	Hydroxychloroquine, FABIFLU, ANTIBIOTICS, VITAMIN C, ZINC, VITAMIN D, VITAMIN A	no	no	11	No	NA	DISCHARGE	16	22.7	no	no	0	no any	12.3	16800	78000	283	76.8	1.2	156	3.8	123	0.7	0.3	25.8	18.7	7	3.4	53.7	NA	0.5	NA	NA	NA	NA	NA	sinus rhythm	normal	NA	No
IGIB1040201878	46	male	Maharashtra	no	Nasopharyngeal swab	1970-01-01	asymptomatic	96.6	100	Hydroxychloroquine, FABIFLU, ANTIBIOTICS, VITAMIN C, ZINC, VITAMIN D, VITAMIN A	no	Hypertension	11	No	NA	DISCHARGE	18	23	no	no	0	no any	10.3	11000	171000	234	165.5	12.5	138	6.5	88	0.5	0.2	107.9	178	6.6	3.8	146.4	NA	0.5	NA	NA	NA	NA	NA	sinus rhythm	normal	NA	No
IGIB1040201879	56	female	Maharashtra	no	Nasopharyngeal swab	1970-01-01	asymptomatic	96.1	98	Hydroxychloroquine, FABIFLU, ANTIBIOTICS, VITAMIN C, ZINC, VITAMIN D, VITAMIN A	no	no	11	No	NA	DISCHARGE	15	21.2	no	no	0	no any	13.4	6500	432000	180	23.1	0.9	140	4	110	0.8	0.5	32	34.8	5.4	3.2	112	NA	less than 0.50	NA	NA	NA	NA	NA	sinus rhythm	normal	NA	No
IGIB1040201880	42	female	Maharashtra	no	Nasopharyngeal swab	1970-01-01	asymptomatic	98.3	99	Hydroxychloroquine, FABIFLU, ANTIBIOTICS, VITAMIN C, ZINC, VITAMIN D, VITAMIN A	no	no	11	No	NA	DISCHARGE	18	22.3	no	no	0	no any	15.9	4900	197000	93	32.9	1.1	143	4.4	108	0.5	0.2	28.6	44.5	6.5	4.1	73.3	NA	less than 0.50	NA	NA	NA	NA	NA	sinus rhythm	normal	NA	No
IGIB1040201891	70	male	Maharashtra	no	Nasopharyngeal swab	1970-01-01	breathlessness and cough	97.6	100	METHYLPREDNISOLONE, Low molecular weight heparin, Hydroxychloroquine, FABIFLU, REMDESIVIR, IVERMECTIN, ANTIBIOTICS, VITAMIN C, ZINC, VITAMIN D, VITAMIN A	no	Hypertension,Diabetes mellitus, old Cerebrovascular accident	NA	Yes	NA	NA	26	25.3	High-Flow Nasal Oxygen	Non-invasive ventilation	1	Basal crepitations	12.8	12800	283000	385	94.1	1.8	134	4.2	104	0.5	0.2	20.6	18.5	6.5	3.6	82.5	NA	NA	NA	NA	NA	NA	NA	sinus rhythm	normal	5	No
IGIB1040201945	42	male	Maharashtra	no	Nasopharyngeal swab	1970-01-01	breathlessness and cough	96.7	96	METHYLPREDNISOLONE, Low molecular weight heparin, Hydroxychloroquine, FABIFLU, REMDESIVIR, IVERMECTIN, ANTIBIOTICS, VITAMIN C, ZINC, VITAMIN D, VITAMIN A	no	no	NA	Yes	NA	NA	26	23.6	Non Re-Breather Mask	Non-invasive ventilation	1	Basal crepitations	10.4	5400	217000	101	26.7	0.8	135	4.5	100	0.6	0.2	68.7	48.5	7.4	3.8	56.7	98	158.5	6	0.19	more than10,000	11.4	169	sinus rhythm	NA	5	No
IGIB1040202044	54	male	Maharashtra	no	Nasopharyngeal swab	1970-01-01	cough, fever, sore throat	97.8	99	METHYLPREDNISOLONE, Low molecular weight heparin, Hydroxychloroquine, FABIFLU, REMDESIVIR, IVERMECTIN, ANTIBIOTICS, VITAMIN C, ZINC, VITAMIN D, VITAMIN A	no	Diabetes mellitus,Ischemic Heart Disease,Hypertension	NA	Yes	NA	NA	22	25	Non Re-Breather Mask, High-Flow Nasal Oxygen	no	0	Basal crepitations	15.6	15300	259000	246	44.2	0.9	143	5.4	104	0.9	0.3	19.1	28.9	6.9	3.5	46.7	331	149.17	3.4	NA	891.73	78.9	721.07	sinus rhythm	NA	5	No
IGIB1040202045	67	male	Maharashtra	no	Nasopharyngeal swab	1970-01-01	malaise	98	100	METHYLPREDNISOLONE, Low molecular weight heparin, Hydroxychloroquine, FABIFLU, REMDESIVIR, IVERMECTIN, ANTIBIOTICS, VITAMIN C, ZINC, VITAMIN D, VITAMIN A	no	Diabetes mellitus	NA	Yes	NA	NA	18	22.4	Non Re-Breather Mask	no	0	Basal crepitations	11.8	11.8	11.8	11.8	11.8	11.8	11.8	11.8	11.8	11.8	11.8	11.8	11.8	11.8	11.8	11.8	11.8	11.8	11.8	11.8	11.8	11.8	11.8	sinus rhythm	NA	5	No
IGIB1040202137	92	male	Maharashtra	no	Nasopharyngeal swab	1970-01-01	breathlessness & myalgia	99.8	94	METHYLPREDNISOLONE, Low molecular weight heparin, Hydroxychloroquine, FABIFLU, REMDESIVIR, IVERMECTIN, ANTIBIOTICS, VITAMIN C, ZINC, VITAMIN D, VITAMIN A	no	no	5	Yes	NA	DEATH	22	23.7	Non Re-Breather Mask, High-Flow Nasal Oxygen	Non-invasive ventilation, Intubated	1	Basal crepitations	14.9	15100	470000	124	56.3	0.8	138	4.3	106	0.9	0.2	38.4	29.6	6	3.2	32.4	342	134.8	6	1.02	more than10,000	125.1	683.1	T wave inversion in II, III, aVF	NA	5	No
IGIB1040202138	37	male	Maharashtra	no	Nasopharyngeal swab	1970-01-01	fever	101	99	METHYLPREDNISOLONE, Low molecular weight heparin, Hydroxychloroquine, FABIFLU, IVERMECTIN, ANTIBIOTICS, VITAMIN C, ZINC, VITAMIN D, VITAMIN A	yes	no	NA	Yes	NA	NA	18	23.6	no	no	0	Basal crepitations	14.9	4300	136000	112	20.3	1.1	145	3.8	106	0.4	0.1	20.5	28	6.8	4.1	68.7	NA	NA	NA	NA	NA	NA	NA	sinus rhythm	NA	5	No
IGIB1040202139	70	female	Maharashtra	no	Nasopharyngeal swab	1970-01-01	breathlessness and cough	97	100	METHYLPREDNISOLONE, Low molecular weight heparin, Hydroxychloroquine, FABIFLU, REMDESIVIR, IVERMECTIN, ANTIBIOTICS, VITAMIN C, ZINC, VITAMIN D, VITAMIN A	no	Diabetes mellitus,Hypertension	NA	Yes	NA	NA	24	22.6	Non Re-Breather Mask	no	1	Basal crepitations	12.1	10100	403000	281	37.8	1	133	4.9	103	0.3	0.1	32.1	27.4	5.9	3	84.5	NA	77.6	NA	NA	420	NA	NA	sinus rhythm	NA	5	No
IGIB1040202229	76	female	Maharashtra	no	Nasopharyngeal swab	1970-01-01	fever, breathlessness	96.9	98	METHYLPREDNISOLONE, Low molecular weight heparin, Hydroxychloroquine, FABIFLU, REMDESIVIR, IVERMECTIN, ANTIBIOTICS, VITAMIN C, ZINC, VITAMIN D, VITAMIN A	no	Diabetes mellitus,Ischemic Heart Disease,Hypertension	NA	Yes	NA	NA	24	25.6	Non Re-Breather Mask, High-Flow Nasal Oxygen	no	1	Basal crepitations	12.1	8900	150000	258	52.6	0.9	142	4.1	95	0.5	0.1	43.3	26	6.1	3.6	64.6	459	67.43	8	0.06	1070.93	33.18	424.18	LBBB	NA	5	No
IGIB1040202411	27	male	Maharashtra	no	Nasopharyngeal swab	1970-01-01	fever, sore throat	NA	NA	METHYLPREDNISOLONE, Low molecular weight heparin, Hydroxychloroquine, FABIFLU, REMDESIVIR, IVERMECTIN, ANTIBIOTICS, VITAMIN C, ZINC, VITAMIN D, VITAMIN A	yes	no	1	NA	NA	NA	NA	NA	NA	NA	NA	Basal crepitations	NA	NA	NA	NA	NA	NA	NA	NA	NA	NA	NA	NA	NA	NA	NA	NA	NA	NA	NA	NA	NA	NA	NA	sinus rhythm	NA	NA	No
IGIB104020246	48	Male	Maharashtra	no	Nasopharyngeal swab	1970-01-01	fever	97.6	98	METHYLPREDNISOLONE, Low molecular weight heparin, Hydroxychloroquine, FABIFLU, IVERMECTIN, ANTIBIOTICS, VITAMIN C, ZINC, VITAMIN D, VITAMIN A	yes	Diabetes mellitus,Hypertension	11	No	NA	DISCHARGE	18	24	no	no	0	no any	16	8700	243000	152	34	1.1	134	4.2	106	0.6	0.3	28.4	32.5	6.5	4	123	210	2.3	NA	NA	NA	NA	NA	sinus rhythm	normal	3	No
IGIB1040202487	48	male	Maharashtra	no	Nasopharyngeal swab	1970-01-01	fever	98.7	99	METHYLPREDNISOLONE, Low molecular weight heparin, Hydroxychloroquine, FABIFLU, REMDESIVIR, IVERMECTIN, ANTIBIOTICS, VITAMIN C, ZINC, VITAMIN D, VITAMIN A	yes	Rheumatic heart disease	NA	No	NA	NA	18	25.7	no	no	0	Basal crepitations	15.2	4700	103000	82	18.6	1.2	140	3.4	103	0.7	0.3	27.6	23.7	7.6	3.9	58	NA	3.65	NA	NA	NA	NA	NA	sinus rhythm	NA	NA	No
IGIB104020262	54	female	Maharashtra	no	Nasopharyngeal swab	1970-01-01	fever, cough,breathlessness	99	99	METHYLPREDNISOLONE, Low molecular weight heparin, Hydroxychloroquine, FABIFLU, IVERMECTIN, ANTIBIOTICS, VITAMIN C, ZINC, VITAMIN D, VITAMIN A	no	Diabetes mellitus	12	Yes	NA	DISCHARGE	24	24.2	Non Re-Breather Mask	no	1	Basal crepitations	13.4	6500	432000	180	23.1	0.9	140	4	110	0.8	0.5	32	34.8	5.4	3.2	112	102	less than 0.50	2	NA	NA	NA	NA	sinus rhythm	normal	4	No
IGIB104020265	71	male	Maharashtra	no	Nasopharyngeal swab	1970-01-01	breathlessness and cough	98.4	97	METHYLPREDNISOLONE, Low molecular weight heparin, Hydroxychloroquine, FABIFLU, REMDESIVIR, IVERMECTIN, ANTIBIOTICS, VITAMIN C, ZINC, VITAMIN D, VITAMIN A	no	Hypertension,Coronary artery bypass Rheumatoid arthritisft	NA	Yes	NA	DISCHARGE	34	18.9	no	Non-invasive ventilation	1	Basal crepitations	12.8	12300	371000	157	164	3	150	7.1	122	0.4	0.2	41.5	57	6.7	3.6	68	NA	167	NA	NA	NA	NA	NA	sinus rhythm	normal	6	No
IGIB1040202719	27	female	Maharashtra	no	Nasopharyngeal swab	1970-01-01	asymptomatic	97.6	99	METHYLPREDNISOLONE, Low molecular weight heparin, Hydroxychloroquine, FABIFLU, IVERMECTIN, ANTIBIOTICS, VITAMIN C, ZINC, VITAMIN D, VITAMIN A	yes	no	NA	No	NA	DISCHARGE	16	24.6	no	no	0	clear	14.6	4900	210000	112	34.2	0.9	143	4.1	108	0.5	0.3	20.9	27.4	7	4	66.9	NA	0.78	NA	NA	NA	NA	NA	sinus rhythm	NA	NA	No
IGIB1040202860	26	female	Maharashtra	no	Nasopharyngeal swab	1970-01-01	fever, sore throat	100	99	METHYLPREDNISOLONE, Low molecular weight heparin, Hydroxychloroquine, FABIFLU, IVERMECTIN, ANTIBIOTICS, VITAMIN C, ZINC, VITAMIN D, VITAMIN A	yes	no	NA	No	NA	DISCHARGE	16	21.6	no	no	0	clear	11.2	4900	193000	96	16.4	0.7	140	4.4	109	0.4	0.1	0.4	17.2	12.6	6.5	3.8	52.7	3.04	NA	NA	140	NA	NA	sinus rhythm	normal	normal	No
IGIB104020325	74	male	Maharashtra	no	Nasopharyngeal swab	1970-01-01	breathlessness and cough	98.2	98	METHYLPREDNISOLONE, Low molecular weight heparin, Hydroxychloroquine, FABIFLU, REMDESIVIR, IVERMECTIN, ANTIBIOTICS, VITAMIN C, ZINC, VITAMIN D, VITAMIN A	yes	Diabetes mellitus,Coronary artery bypass Rheumatoid arthritisft	13	Yes	NA	DEATH	30	20.8	no	Non-invasive ventilation, Intubation	1	Basal crepitations	14.5	5900	275000	232	52.3	0.9	136	4.9	106	0.7	0.2	38	28.8	6	3.4	49.2	432	166.3	5	6.31	1141.39	21.11	NA	sinus rhythm	normal	6	No
IGIB104020327	67	male	Maharashtra	no	Nasopharyngeal swab	1970-01-01	breathlessness and cough	97.6	97	Hydroxychloroquine, FABIFLU, ANTIBIOTICS, VITAMIN C, ZINC, VITAMIN D, VITAMIN A	no	Hypertension	26	Yes	NA	DISCHARGE	22	23.2	Non Re-Breather Mask	no	1	no any	13.1	17800	514000	126	80.2	1.7	131	3.6	97	1.2	0.8	43.2	23.4	5.8	3	65.7	1347	145	10	2.87	1459	NA	36.89	sinus rhythm	normal	5	No
IGIB1040203414	24	female	Maharashtra	no	Nasopharyngeal swab	1970-01-01	fever, sore throat	99.7	99	METHYLPREDNISOLONE, Low molecular weight heparin, Hydroxychloroquine, FABIFLU, IVERMECTIN, ANTIBIOTICS, VITAMIN C, ZINC, VITAMIN D, VITAMIN A	yes	no	NA	No	NA	NA	17	22.4	no	no	0	clear	13.7	4500	181000	110	20.9	0.7	149	4.8	114	0.4	0.1	18.2	17.2	6.4	3.8	67	NA	NA	NA	NA	NA	NA	NA	sinus rhythm	normal	normal	No
IGIB1040203569	76	male	Maharashtra	no	Nasopharyngeal swab	1970-01-01	breathlessness, fever	NA	NA	METHYLPREDNISOLONE, Low molecular weight heparin, Hydroxychloroquine, FABIFLU, IVERMECTIN, ANTIBIOTICS, VITAMIN C, ZINC, VITAMIN D, VITAMIN A	no	no	NA	NA	NA	NA	NA	NA	NA	NA	NA	Basal crepitations	NA	NA	NA	NA	NA	NA	NA	NA	NA	NA	NA	NA	NA	NA	NA	NA	NA	NA	NA	NA	NA	NA	NA	sinus rhythm	NA	NA	No
IGIB1040203570	25	female	Maharashtra	no	Nasopharyngeal swab	1970-01-01	fever, sore throat, cough	97.8	96	METHYLPREDNISOLONE, Low molecular weight heparin, Hydroxychloroquine, FABIFLU, IVERMECTIN, ANTIBIOTICS, VITAMIN C, ZINC, VITAMIN D, VITAMIN A	yes	no	7	No	NA	NA	16	22.6	no	no	0	clear	12.3	5800	226000	74	18.9	0.8	142	3.8	109	0.8	0.2	18.5	18.3	6.7	3.7	61.4	425	more than0.50	4	0.5	680	NA	54.8	sinus rhythm	normal	5	No
IGIB1040203762	38	male	Maharashtra	no	Nasopharyngeal swab	1970-01-01	fever,cough	96.8	98	METHYLPREDNISOLONE, Low molecular weight heparin, Hydroxychloroquine, FABIFLU, REMDESIVIR, IVERMECTIN, ANTIBIOTICS, VITAMIN C, ZINC, VITAMIN D, VITAMIN A	no	no	8	No	NA	DISCHARGE	18	23.8	no	no	0	clear	14.2	7600	183000	84	24.7	1	145	3.6	110	0.5	0.3	31.6	31.2	6.5	3.6	64.1	457	24.43	NA	NA	810	NA	243.7	sinus rhythm	normal	5	No
IGIB1040203763	28	male	Maharashtra	no	Nasopharyngeal swab	1970-01-01	fever,cough	97.8	98	METHYLPREDNISOLONE, Low molecular weight heparin, Hydroxychloroquine, FABIFLU, REMDESIVIR, IVERMECTIN, ANTIBIOTICS, VITAMIN C, ZINC, VITAMIN D, VITAMIN A	no	no	NA	No	NA	DISCHARGE	18	24.6	no	no	0	clear	16.3	8100	195000	84	21	1.1	139	3.5	108	0.8	0.3	43.2	39	6.8	3.6	58.9	358	2.94	NA	0.01	1080	NA	574.4	sinus rhythm	normal	5	No
IGIB1040203854	38	female	Maharashtra	no	Nasopharyngeal swab	1970-01-01	fever	98	96	METHYLPREDNISOLONE, Low molecular weight heparin, Hydroxychloroquine, FABIFLU, IVERMECTIN, ANTIBIOTICS, VITAMIN C, ZINC, VITAMIN D, VITAMIN A	yes	no	NA	No	NA	DISCHARGE	16	23.4	no	no	0	clear	10.1	5700	295000	101	15.7	0.7	142	3	111	0.4	0.1	23.8	18.8	5.6	3.2	55.6	NA	2.45	NA	NA	730	NA	111.8	sinus rhythm	normal	3	No
IGIB1040204097	56	male	Maharashtra	no	Nasopharyngeal swab	1970-01-01	fever, cough,breathlessness	97.5	NA	METHYLPREDNISOLONE, Low molecular weight heparin, Hydroxychloroquine, FABIFLU, IVERMECTIN, ANTIBIOTICS, VITAMIN C, ZINC, VITAMIN D, VITAMIN A	no	no	NA	NA	NA	NA	NA	NA	NA	NA	NA	Basal crepitations	NA	NA	NA	NA	NA	NA	NA	NA	NA	NA	NA	NA	NA	NA	NA	NA	NA	NA	NA	NA	NA	NA	NA	sinus rhythm	NA	NA	No
IGIB1040204112	33	male	Maharashtra	no	Nasopharyngeal swab	1970-01-01	breathlessness and cough	98.5	98	METHYLPREDNISOLONE, Low molecular weight heparin, Hydroxychloroquine, FABIFLU, REMDESIVIR, IVERMECTIN, ANTIBIOTICS, VITAMIN C, ZINC, VITAMIN D, VITAMIN A	no	no	NA	Yes	NA	NA	24	23.6	Non Re-Breather Mask	no	1	Basal crepitations	14.7	5500	130000	84	26.4	1.2	141	3.8	105	0.8	0.2	52.9	96.8	6.3	3.5	70.1	934	45.4	NA	NA	2100	NA	329.5	sinus rhythm	normal	5	No
IGIB1040204114	45	male	Maharashtra	no	Nasopharyngeal swab	1970-01-01	breathlessness and cough	96.4	96	METHYLPREDNISOLONE, Low molecular weight heparin, Hydroxychloroquine, FABIFLU, REMDESIVIR, IVERMECTIN, ANTIBIOTICS, VITAMIN C, ZINC, VITAMIN D, VITAMIN A	no	no	NA	Yes	NA	DISCHARGE	24	24.7	Non Re-Breather Mask	no	1	Basal crepitations	0	5400	211000	98	26.4	0.9	144	4.5	108	0.6	0.3	96	143	6	3.3	100	634	33	12	NA	1260	NA	236.9	sinus rhythm	normal	5	No
IGIB1040204115	48	male	Maharashtra	no	Nasopharyngeal swab	1970-01-01	asymptomatic	97.8	99	METHYLPREDNISOLONE, Low molecular weight heparin, Hydroxychloroquine, FABIFLU, IVERMECTIN, ANTIBIOTICS, VITAMIN C, ZINC, VITAMIN D, VITAMIN A	no	no	11	No	NA	DISCHARGE	16	25.6	no	no	0	clear	15.4	7200	183000	97	27.8	0.9	135	4.1	105	0.6	0.3	26.2	33.1	7.1	3.7	67.8	87.9	6.24	NA	NA	630	NA	NA	sinus rhythm	normal	5	No
IGIB1040204198	38	female	Maharashtra	no	Nasopharyngeal swab	1970-01-01	asymptomatic	96.8	98	METHYLPREDNISOLONE, Low molecular weight heparin, Hydroxychloroquine, FABIFLU, IVERMECTIN, ANTIBIOTICS, VITAMIN C, ZINC, VITAMIN D, VITAMIN A	no	no	11	No	NA	DISCHARGE	14	22.4	no	no	0	clear	10.1	5700	295000	101	32.4	0.8	142	3	111	0.4	0.2	23.1	18.8	5.6	3.2	55.6	67	0.26	NA	NA	730	NA	NA	sinus rhythm	normal	5	No
IGIB1040204280	41	female	Maharashtra	no	Nasopharyngeal swab	1970-01-01	cough	98.4	99	METHYLPREDNISOLONE, Low molecular weight heparin, Hydroxychloroquine, FABIFLU, REMDESIVIR, IVERMECTIN, ANTIBIOTICS, VITAMIN C, ZINC, VITAMIN D, VITAMIN A	no	no	11	No	NA	DISCHARGE	17	26.8	no	no	0	clear	10.7	11500	148000	125	13.5	0.8	142	5.3	109	0.5	0.2	28	13.3	7.1	3.7	144.3	336	381	14	NA	2000	NA	435	sinus rhythm	normal	5	No
IGIB1040204315	53	male	Maharashtra	no	Nasopharyngeal swab	1970-01-01	fever, cough,breathlessness	97.8	97	METHYLPREDNISOLONE, Low molecular weight heparin, Hydroxychloroquine, FABIFLU, REMDESIVIR, IVERMECTIN, ANTIBIOTICS, VITAMIN C, ZINC, VITAMIN D, VITAMIN A	no	Diabetes mellitus,Hypertension,Pulmonary tuberculosis	NA	Yes	NA	DISCHARGE	20	24.5	Non Re-Breather Mask	no	0	Basal crepitations	12.5	5400	116000	219	36.3	1.7	135	4.5	101	0.6	0.3	38.4	45.5	6.8	3.7	47.8	NA	42.45	20	NA	715	NA	805	sinus rhythm	normal	5	No
IGIB1040204316	69	male	Maharashtra	no	Nasopharyngeal swab	1970-01-01	fever,cough	98.6	97	METHYLPREDNISOLONE, Low molecular weight heparin, Hydroxychloroquine, FABIFLU, REMDESIVIR, IVERMECTIN, ANTIBIOTICS, VITAMIN C, ZINC, VITAMIN D, VITAMIN A	no	Diabetes mellitus,Hypertension	NA	Yes	NA	DISCHARGE	18	23.6	Non Re-Breather Mask	no	0	clear	15.8	9800	1`,80,000	114	23.9	1	131	3.6	105	0.3	0.1	127	120	6.1	3.7	102	729	34.5	NA	NA	738	NA	NA	sinus rhythm	normal	5	No
IGIB1040204596	18	female	Maharashtra	no	Nasopharyngeal swab	1970-01-01	asymptomatic	97.8	98	METHYLPREDNISOLONE, Low molecular weight heparin, Hydroxychloroquine, FABIFLU, IVERMECTIN, ANTIBIOTICS, VITAMIN C, ZINC, VITAMIN D, VITAMIN A	yes	no	NA	No	NA	DISCHARGE	16	22.8	no	no	0	clear	10.3	3400	136000	76	14.1	0.8	144	5.1	109	0.6	0.2	27.3	20.2	6.8	3.4	78.9	283	0.56	NA	NA	666	NA	NA	sinus rhythm	normal	normal	No
IGIB1040204597	25	male	Maharashtra	yes	Nasopharyngeal swab	1970-01-01	malaise	98.7	98	METHYLPREDNISOLONE, Low molecular weight heparin, Hydroxychloroquine, FABIFLU, IVERMECTIN, ANTIBIOTICS, VITAMIN C, ZINC, VITAMIN D, VITAMIN A	yes	no	9	No	NA	DISCHARGE	15	23.8	no	no	0	clear	15.8	7100	287000	104	33.9	1	140	3.7	106	0.3	0.1	29.8	56.3	6.5	3.9	65.1	570	2.34	8	NA	720	NA	NA	sinus rhythm	normal	4	No
IGIB104020460	38	male	Maharashtra	no	Nasopharyngeal swab	1970-01-01	breathlessness and cough	97.8	98	METHYLPREDNISOLONE, Low molecular weight heparin, Hydroxychloroquine, FABIFLU, REMDESIVIR, IVERMECTIN, ANTIBIOTICS, VITAMIN C, ZINC, VITAMIN D, VITAMIN A	no	no	NA	Yes	NA	NA	28	25.1	High-Flow Nasal Oxygen	Non-invasive ventilation	1	Basal crepitations	14.2	20300	328000	87	48.6	0.8	144	3.8	110	0.6	0.2	36.1	42.7	6.6	4.1	44.7	118	75.7	6	0.39	996.14	292.2	1907.29	sinus rhythm	normal	5	No
IGIB104020564	46	female	Maharashtra	no	Nasopharyngeal swab	1970-01-01	breathlessness and cough	98.6	99	METHYLPREDNISOLONE, Low molecular weight heparin, Hydroxychloroquine, FABIFLU, REMDESIVIR, IVERMECTIN, ANTIBIOTICS, VITAMIN C, ZINC, VITAMIN D, VITAMIN A	no	Diabetes mellitus,Hypertension	1	Yes	NA	NA	26	22.2	yes	no	1	Basal crepitations	8.5	9800	419000	351	54.9	1.1	130	5.4	108	1.2	0.7	31.1	34.5	6	3.9	56.3	NA	16.1	NA	NA	NA	NA	NA	sinus rhythm	normal	5	No
IGIB1040206218	23	male	Maharashtra	no	Nasopharyngeal swab	1970-01-01	fever,cough	96.7	97	METHYLPREDNISOLONE, Low molecular weight heparin, Hydroxychloroquine, FABIFLU, IVERMECTIN, ANTIBIOTICS, VITAMIN C, ZINC, VITAMIN D, VITAMIN A	no	no	NA	No	NA	NA	18	25.4	no	no	0	clear	15.8	9700	134000	120	19.9	1.1	144	4.4	109	0.9	0.4	25	22.9	6.6	3.9	62.5	582	24.67	14	NA	720	NA	138.5	sinus rhythm	normal	5	No
IGIB1040206221	52	male	Maharashtra	no	Nasopharyngeal swab	1970-01-01	fever, sore throat	97	99	METHYLPREDNISOLONE, Low molecular weight heparin, Hydroxychloroquine, FABIFLU, REMDESIVIR, IVERMECTIN, ANTIBIOTICS, VITAMIN C, ZINC, VITAMIN D, VITAMIN A	no	Hypertension,Diabetes mellitus	NA	No	NA	NA	18	23.4	no	no	0	clear	10.1	13400	92000	201	19.6	1	133	4.4	90	0.6	0.2	23.7	20.9	6.4	3.6	43.7	324	147	20	NA	2000	NA	334.8	sinus rhythm	NA	5	No
IGIB1040206222	40	female	Maharashtra	no	Nasopharyngeal swab	1970-01-01	fever, breathlessness	102	97	METHYLPREDNISOLONE, Low molecular weight heparin, Hydroxychloroquine, FABIFLU, IVERMECTIN, ANTIBIOTICS, VITAMIN C, ZINC, VITAMIN D, VITAMIN A	no	Diabetes mellitus	13	Yes	NA	DISCHARGE	22	25.6	Non Re-Breather Mask	no	1	Basal crepitations	14.4	4500	152000	107	23.4	0.9	143	5	110	1	0.4	34.6	30.9	5.7	3.1	76.8	109	13.4	22	NA	NA	NA	NA	sinus rhythm	normal	5	No
IGIB1040206225	64	male	Maharashtra	no	Nasopharyngeal swab	1970-01-01	fever, cough,breathlessness	99.7	98	METHYLPREDNISOLONE, Low molecular weight heparin, Hydroxychloroquine, FABIFLU, IVERMECTIN, ANTIBIOTICS, VITAMIN C, ZINC, VITAMIN D, VITAMIN A	yes	Diabetes mellitus,Ischemic Heart Disease,Hypertension	1	Yes	NA	DAMA	22	24.6	Non Re-Breather Mask	no	1	Basal crepitations	15.6	5400	224000	169	27.6	1	NA	NA	NA	NA	NA	NA	NA	NA	NA	NA	NA	NA	NA	NA	NA	NA	NA	sinus rhythm	normal	5	No
IGIB1040206227	56	male	Maharashtra	no	Nasopharyngeal swab	1970-01-01	breathlessness and cough	98.6	97	METHYLPREDNISOLONE, Low molecular weight heparin, Hydroxychloroquine, FABIFLU, REMDESIVIR, IVERMECTIN, ANTIBIOTICS, VITAMIN C, ZINC, VITAMIN D, VITAMIN A	no	Hypertension	4	Yes	NA	DAMA	22	23.5	Non Re-Breather Mask	no	1	Basal crepitations	12.2	6500	362000	119	59.1	1.4	134	3.9	94	0.8	0.3	46.7	40.9	7.1	3.5	76.8	675	65.7	24	0.6	2098	24.7	359.1	sinus rhythm	NA	5	No
IGIB1040206234	58	female	Maharashtra	no	Nasopharyngeal swab	1970-01-01	breathlessness and cough	95.7	96	METHYLPREDNISOLONE, Low molecular weight heparin, Hydroxychloroquine, FABIFLU, REMDESIVIR, IVERMECTIN, ANTIBIOTICS, VITAMIN C, ZINC, VITAMIN D, VITAMIN A	no	Ischemic Heart Disease,Hypertension	10	Yes	NA	DISCHARGE	26	22.7	Non Re-Breather Mask	no	1	Basal crepitations	13.1	2500	352000	130	20	0.8	146	4.5	110	0.3	0.1	19.8	18.1	7.6	3.7	97.4	276	25.8	18	NA	890	NA	NA	sinus rhythm	NA	5	No
IGIB1040206235	36	male	Maharashtra	no	Nasopharyngeal swab	1970-01-01	sorethroat	97.2	98	Hydroxychloroquine, FABIFLU, IVERMECTIN, ANTIBIOTICS, VITAMIN C, ZINC, VITAMIN D, VITAMIN A	no	no	9	No	NA	DISCHARGE	18	25.7	no	no	0	clear	15.6	5100	221000	130	18.9	0.8	138	4.6	108	0.7	0.4	27.4	28.3	7.3	4.3	41.4	NA	less than 0.50	NA	NA	NA	NA	NA	sinus rhythm	normal	5	No
IGIB1040206240	18	male	Maharashtra	no	Nasopharyngeal swab	1970-01-01	fever, sore throat	97	97	Hydroxychloroquine, FABIFLU, IVERMECTIN, ANTIBIOTICS, VITAMIN C, ZINC, VITAMIN D, VITAMIN A	yes	no	15	No	NA	DISCHARGE	16	22.2	no	no	0	clear	14.2	7600	183000	84	24.7	1	145	3.6	110	0.5	0.3	31.6	31.2	6.5	3.6	64.1	NA	2.34	8	NA	NA	NA	NA	sinus rhythm	normal	5	No
IGIB1040206249	63	male	Maharashtra	no	Nasopharyngeal swab	1970-01-01	myalgia	97.8	96	Hydroxychloroquine, FABIFLU, IVERMECTIN, ANTIBIOTICS, VITAMIN C, ZINC, VITAMIN D, VITAMIN A	no	Diabetes mellitus,Hypertension	10	No	NA	DISCHARGE	17	27.4	no	no	0	clear	16.4	9100	322000	115	22.5	0.9	143	4.6	110	0.9	0.4	34.5	30.9	6.5	3.4	57.8	NA	0.67	NA	NA	NA	NA	NA	sinus rhythm	normal	5	No
IGIB1040206253	48	male	Maharashtra	no	Nasopharyngeal swab	1970-01-01	breathlessness and cough	96.6	97	METHYLPREDNISOLONE, Low molecular weight heparin, Hydroxychloroquine, FABIFLU, REMDESIVIR, IVERMECTIN, ANTIBIOTICS, VITAMIN C, ZINC, VITAMIN D, VITAMIN A	no	Hypertension	13	Yes	NA	DISCHARGE	22	25.6	Non Re-Breather Mask	no	1	Basal crepitations	16	7300	180000	91	21.6	0.9	144	3.8	108	0.6	0.2	33.6	48.9	6.5	4.2	45.4	NA	6.8	6	NA	649	NA	102.36	sinus rhythm	normal	5	No
IGIB1040206254	65	female	Maharashtra	no	Nasopharyngeal swab	1970-01-01	fever, sore throat	97.6	97	METHYLPREDNISOLONE, Low molecular weight heparin, Hydroxychloroquine, FABIFLU, IVERMECTIN, ANTIBIOTICS, VITAMIN C, ZINC, VITAMIN D, VITAMIN A	no	no	10	No	NA	DISCHARGE	17	21.5	no	no	0	clear	12.4	9400	112000	98	39.9	1	138	4.2	116	0.5	0.2	88.9	43.7	6.3	3.7	237	NA	0.67	NA	NA	NA	NA	NA	sinus rhythm	normal	5	No
IGIB1040206255	40	male	Maharashtra	no	Nasopharyngeal swab	1970-01-01	cough, fever, sore throat	96.1	99	METHYLPREDNISOLONE, Low molecular weight heparin, Hydroxychloroquine, FABIFLU, IVERMECTIN, ANTIBIOTICS, VITAMIN C, ZINC, VITAMIN D, VITAMIN A	no	no	11	No	NA	DISCHARGE	18	20.3	no	no	0	clear	13.9	3900	165000	86	23.3	1.3	140	3.9	106	1	0.3	36.7	32.7	6	3.8	60.6	NA	0.24	NA	NA	NA	NA	NA	sinus rhythm	normal	5	No
IGIB1040206256	46	male	Maharashtra	no	Nasopharyngeal swab	1970-01-01	cough, fever, sore throat	98	96	METHYLPREDNISOLONE, Low molecular weight heparin, Hydroxychloroquine, FABIFLU, IVERMECTIN, ANTIBIOTICS, VITAMIN C, ZINC, VITAMIN D, VITAMIN A	no	no	11	No	NA	DISCHARGE	18	22.3	no	no	0	clear	13.7	4200	147000	104	17	0.9	138	4.5	112	0.8	0.2	73.9	105.2	7.4	3.9	112	NA	0.1	NA	NA	NA	NA	NA	sinus rhythm	normal	5	No
IGIB1040206257	60	male	Maharashtra	no	Nasopharyngeal swab	1970-01-01	breathlessness and cough	96.5	96	METHYLPREDNISOLONE, Low molecular weight heparin, Hydroxychloroquine, FABIFLU, REMDESIVIR, IVERMECTIN, ANTIBIOTICS, VITAMIN C, ZINC, VITAMIN D, VITAMIN A	no	Diabetes mellitus	12	Yes	NA	DISCHARGE	22	22.1	Non Re-Breather Mask	no	1	Basal crepitations	14.6	5400	211000	98	26.4	0.9	144	4.5	108	0.6	0.3	96	143	6	3.3	87	645	33	12	NA	1260	NA	236.9	sinus rhythm	normal	5	No
IGIB1040206259	32	male	Maharashtra	no	Nasopharyngeal swab	1970-01-01	breathlessness, fever	98.7	95	METHYLPREDNISOLONE, Low molecular weight heparin, Hydroxychloroquine, FABIFLU, REMDESIVIR, IVERMECTIN, ANTIBIOTICS, VITAMIN C, ZINC, VITAMIN D, VITAMIN A	yes	no	7	Yes	NA	DAMA	24	24.6	Non Re-Breather Mask	no	1	Basal crepitations	14.2	4700	111000	78	17.7	1	143	4.4	105	1	0.4	65.7	54	7	3.9	109	589	43.7	16	0.04	2000	NA	137.98	sinus rhythm	NA	5	No
IGIB1040206260	32	female	Maharashtra	no	Nasopharyngeal swab	1970-01-01	fever	99.1	97	Hydroxychloroquine, FABIFLU, IVERMECTIN, ANTIBIOTICS, VITAMIN C, ZINC, VITAMIN D, VITAMIN A	yes	no	13	No	NA	DISCHARGE	17	25.4	no	no	0	clear	16	11000	378000	205	24.6	0.8	134	4.6	111	0.6	0.4	32.4	28.7	5.8	3.4	45.3	NA	15.56	NA	NA	NA	NA	NA	sinus rhythm	normal	5	No
IGIB104020630	56	female	Maharashtra	no	Nasopharyngeal swab	1970-01-01	cough	97.2	98	METHYLPREDNISOLONE, Low molecular weight heparin, Hydroxychloroquine, FABIFLU, REMDESIVIR, IVERMECTIN, ANTIBIOTICS, VITAMIN C, ZINC, VITAMIN D, VITAMIN A	no	Diabetes mellitus	1	Yes	NA	NA	24	24.4	yes	no	1	Basal crepitations	12.3	14400	419000	303	91	1.7	141	5.2	108	0.8	0.3	18.2	15	7.3	3.5	66.1	NA	8.5	NA	NA	NA	NA	NA	sinus rhythm	normal	4	No
IGIB1040206347	9	female	Maharashtra	no	Nasopharyngeal swab	1970-01-01	asymptomatic	97.6	98	Hydroxychloroquine, FABIFLU, IVERMECTIN, ANTIBIOTICS, VITAMIN C, ZINC, VITAMIN D, VITAMIN A	yes	no	10	No	NA	DISCHARGE	20	23.5	no	no	0	clear	14	5900	199000	120	38.3	1.9	146	5.2	111	0.5	0.2	285	190	5.8	2.9	217	NA	160.2	NA	NA	NA	NA	NA	sinus rhythm	normal	5	No
IGIB1040206356	48	male	Maharashtra	no	Nasopharyngeal swab	1970-01-01	fever, cough,breathlessness	96	97	METHYLPREDNISOLONE, Low molecular weight heparin, Hydroxychloroquine, FABIFLU, REMDESIVIR, IVERMECTIN, ANTIBIOTICS, VITAMIN C, ZINC, VITAMIN D, VITAMIN A	no	Hypertension,Ischemic Heart Disease	13	Yes	NA	DISCHARGE	24	24.6	Non Re-Breather Mask	no	1	Basal crepitations	15.5	5300	235000	134	26.2	0.9	141	3.8	103	0.8	0.4	24.3	20.5	6.5	4.2	75	409	102	20	0.2	5000	14.6	432.7	sinus rhythm	NA	5	No
IGIB10402063721	54	male	Maharashtra	yes	Nasopharyngeal swab	1970-01-01	fever, breathlessness	99.8	99	METHYLPREDNISOLONE, Low molecular weight heparin, Hydroxychloroquine, FABIFLU, REMDESIVIR, IVERMECTIN, ANTIBIOTICS, VITAMIN C, ZINC, VITAMIN D, VITAMIN A	yes	Hypertension	3	Yes	NA	DAMA	20	23.8	yes	no	1	Basal crepitations	10.3	15100	318000	96.7	35.4	1.2	140	3.8	106	no	no	no	no	no	no	no	NA	153.43	22	NA	NA	NA	NA	sinus rhythm	normal	5	No
IGIB1040206372	38	male	Maharashtra	no	Nasopharyngeal swab	1970-01-01	fever	98.4	98	METHYLPREDNISOLONE, Low molecular weight heparin, Hydroxychloroquine, FABIFLU, IVERMECTIN, ANTIBIOTICS, VITAMIN C, ZINC, VITAMIN D, VITAMIN A	no	no	10	No	NA	DISCHARGE	16	21.5	no	no	0	clear	15.8	5700	174000	95	19	0.9	144	4.6	104	1.3	0.4	17.2	14.1	6.8	4.1	82.7	NA	3.5	10	NA	760	NA	NA	sinus rhythm	normal	5	No
IGIB1040206373	14	male	Maharashtra	no	Nasopharyngeal swab	1970-01-01	asymptomatic	96.7	99	Hydroxychloroquine, FABIFLU, IVERMECTIN, ANTIBIOTICS, VITAMIN C, ZINC, VITAMIN D, VITAMIN A	yes	no	9	No	NA	DISCHARGE	20	23	no	no	0	clear	13.4	5400	265000	94	15.6	0.9	139	4	106	0.8	0.3	16.7	11	7.2	4.1	134.9	NA	less than 0.50	NA	NA	NA	NA	NA	sinus rhythm	normal	5	No
IGIB1040206374	18	female	Maharashtra	no	Nasopharyngeal swab	1970-01-01	asymptomatic	97.8	98	Hydroxychloroquine, FABIFLU, IVERMECTIN, ANTIBIOTICS, VITAMIN C, ZINC, VITAMIN D, VITAMIN A	yes	no	9	No	NA	DISCHARGE	20	21.3	no	no	0	clear	13.3	5300	236000	78	21.5	0.8	141	3.8	106	0.4	0.2	18.9	15.7	7	4.2	63.2	NA	2.28	NA	NA	NA	NA	NA	sinus rhythm	normal	5	No
IGIB1040206381	44	female	Maharashtra	no	Nasopharyngeal swab	1970-01-01	fever, sore throat	98	97	METHYLPREDNISOLONE, Low molecular weight heparin, Hydroxychloroquine, FABIFLU, IVERMECTIN, ANTIBIOTICS, VITAMIN C, ZINC, VITAMIN D, VITAMIN A	no	Diabetes mellitus	13	No	NA	DISCHARGE	18	23.8	no	no	0	clear	13.9	7700	355000	87	18.2	0.7	143	4.3	109	0.6	0.2	38.6	26.4	5.6	3.2	45.4	NA	0.35	NA	NA	NA	NA	NA	sinus rhythm	normal	5	No
IGIB1040206382	40	female	Maharashtra	no	Nasopharyngeal swab	1970-01-01	fever	99.8	97	METHYLPREDNISOLONE, Low molecular weight heparin, Hydroxychloroquine, FABIFLU, IVERMECTIN, ANTIBIOTICS, VITAMIN C, ZINC, VITAMIN D, VITAMIN A	no	no	12	No	NA	DISCHARGE	18	21.5	no	no	0	clear	16	11000	378000	205	24.6	0.8	134	4.6	111	0.6	0.4	32.4	28.7	5.8	3.4	45.3	NA	15.56	NA	NA	NA	NA	NA	sinus rhythm	normal	5	No
IGIB1040206384	41	female	Maharashtra	no	Nasopharyngeal swab	1970-01-01	breathlessness and cough	101	98	METHYLPREDNISOLONE, Low molecular weight heparin, Hydroxychloroquine, FABIFLU, REMDESIVIR, IVERMECTIN, ANTIBIOTICS, VITAMIN C, ZINC, VITAMIN D, VITAMIN A	no	Diabetes mellitus,Hypertension	18	Yes	NA	DISCHARGE	26	22.4	Non Re-Breather Mask, High-Flow Nasal Oxygen	no	1	Basal crepitations	9.8	4800	274000	326	46.7	1.2	140	5.1	105	0.7	0.3	65.8	57.9	6.5	3.1	78.4	167	25.8	12	0.03	10000	8.97	256.8	sinus rhythm	NA	5	No
IGIB104020639	58	male	Maharashtra	no	Nasopharyngeal swab	1970-01-01	fever, breathlessness	100.1	100	METHYLPREDNISOLONE, Low molecular weight heparin, Hydroxychloroquine, FABIFLU, REMDESIVIR, IVERMECTIN, ANTIBIOTICS, VITAMIN C, ZINC, VITAMIN D, VITAMIN A	no	no	30	Yes	NA	DISCHARGE	26	22.3	High-Flow Nasal Oxygen	no	2	Basal crepitations	14.3	14600	546000	102	76	1.3	140	3.6	110	0.9	0.4	45.8	38.9	7	3.6	136	423	less than 0.50	14	0.06	10000	6.78	1278.9	sinus rhythm	normal	4	No
IGIB104020640	56	female	Maharashtra	no	Nasopharyngeal swab	1970-01-01	breathlessness and cough	99.1	99	METHYLPREDNISOLONE, Low molecular weight heparin, Hydroxychloroquine, FABIFLU, REMDESIVIR, IVERMECTIN, ANTIBIOTICS, VITAMIN C, ZINC, VITAMIN D, VITAMIN A	no	Diabetes mellitus	NA	Yes	NA	NA	28	22.4	High-Flow Nasal Oxygen	Non-invasive ventilation	1	Basal crepitations	14	18500	191000	92	26.7	1	140	5.1	106	0.4	0.1	58.7	45.5	5.5	3.1	84.8	675	101	10	0.9	1109	11.21	NA	sinus rhythm	normal	5	No
IGIB1040206488	43	male	Maharashtra	no	Nasopharyngeal swab	1970-01-01	fever	98.4	97	Hydroxychloroquine, FABIFLU, IVERMECTIN, ANTIBIOTICS, VITAMIN C, ZINC, VITAMIN D, VITAMIN A	no	no	15	No	NA	DISCHARGE	18	20.9	no	no	0	clear	9.5	12400	379000	103	29.9	0.9	136	4.5	102	0.6	0.2	23.4	21.2	6.6	2.9	67.8	NA	3.7	NA	NA	NA	NA	NA	sinus rhythm	normal	5	No
IGIB1040206489	53	male	Maharashtra	no	Nasopharyngeal swab	1970-01-01	breathlessness	97.8	96	METHYLPREDNISOLONE, Low molecular weight heparin, Hydroxychloroquine, FABIFLU, REMDESIVIR, TOCILIZUMAB, IVERMECTIN, ANTIBIOTICS, VITAMIN C, ZINC, VITAMIN D, VITAMIN A	no	Diabetes mellitus	13	Yes	NA	DISCHARGE	26	22.7	Non Re-Breather Mask, High-Flow Nasal Oxygen	no	1	Basal crepitations	15	9500	199000	173	22.6	0.8	137	3.8	102	0.5	0.2	17.3	18.3	6	3.5	148.1	920	34.3	8	NA	10000	6.4	198.4	sinus rhythm	NA	5	No
IGIB1040206499	34	female	Maharashtra	no	Nasopharyngeal swab	1970-01-01	breathlessness and cough	97	97	METHYLPREDNISOLONE, Low molecular weight heparin, Hydroxychloroquine, FABIFLU, REMDESIVIR, IVERMECTIN, ANTIBIOTICS, VITAMIN C, ZINC, VITAMIN D, VITAMIN A	no	no	18	Yes	NA	DISCHARGE	24	26.2	Non Re-Breather Mask, High-Flow Nasal Oxygen	no	1	Basal crepitations	13.3	4400	214000	98	19.1	0.9	138	4.3	110	0.7	0.4	23.6	21.6	6.4	3.2	87.9	678	less than 0.50	6	NA	2000	NA	NA	sinus rhythm	NA	5	No
IGIB1040206500	65	female	Maharashtra	no	Nasopharyngeal swab	1970-01-01	cough, fever, sore throat	96.9	96	METHYLPREDNISOLONE, Low molecular weight heparin, Hydroxychloroquine, FABIFLU, REMDESIVIR, IVERMECTIN, ANTIBIOTICS, VITAMIN C, ZINC, VITAMIN D, VITAMIN A	no	Diabetes mellitus,Hypertension	24	Yes	NA	DISCHARGE	22	22.3	Non Re-Breather Mask	no	1	Basal crepitations	9.7	8600	267000	332	61.8	1.6	142	5	109	0.9	0.5	43.5	34.5	6.8	3.1	64.7	NA	7.28	NA	NA	NA	NA	NA	sinus rhythm	NA	5	No
IGIB1040206502	85	female	Maharashtra	no	Nasopharyngeal swab	1970-01-01	breathlessness and cough	98.4	97	METHYLPREDNISOLONE, Low molecular weight heparin, Hydroxychloroquine, FABIFLU, REMDESIVIR, IVERMECTIN, ANTIBIOTICS, VITAMIN C, ZINC, VITAMIN D, VITAMIN A	no	Diabetes mellitus,Ischemic Heart Disease,Hypertension	13	Yes	NA	DISCHARGE	21	22.3	Non Re-Breather Mask	no	1	Basal crepitations	13.4	5400	265000	94	15.6	0.9	139	4	106	0.8	0.3	16.7	11	7.2	4.1	134.9	NA	less than 0.50	NA	NA	NA	NA	NA	sinus rhythm	NA	5	No
IGIB1040206504	65	male	Maharashtra	no	Nasopharyngeal swab	1970-01-01	cough, fever, sore throat	101	98	METHYLPREDNISOLONE, Low molecular weight heparin, Hydroxychloroquine, FABIFLU, REMDESIVIR, IVERMECTIN, ANTIBIOTICS, VITAMIN C, ZINC, VITAMIN D, VITAMIN A	no	Diabetes mellitus,Hypertension	13	No	NA	DISCHARGE	18	20.9	no	no	0	clear	10.1	5700	295000	101	32.4	0.8	142	3	111	0.4	0.2	23.1	18.8	6.8	3.1	78.9	NA	3.24	NA	NA	NA	NA	NA	sinus rhythm	NA	5	No
IGIB1040206513	21	female	Maharashtra	no	Nasopharyngeal swab	1970-01-01	asymptomatic	98.7	97	Hydroxychloroquine, FABIFLU, IVERMECTIN, ANTIBIOTICS, VITAMIN C, ZINC, VITAMIN D, VITAMIN A	yes	no	14	No	NA	DISCHARGE	15	22.7	no	no	0	clear	13.2	9700	184000	76	21	0.8	136	3.4	98	0.6	0.3	13.4	11.3	5	3.1	132.7	NA	2.12	NA	NA	NA	NA	NA	sinus rhythm	normal	5	No
IGIB1040206522	29	female	Maharashtra	no	Nasopharyngeal swab	1970-01-01	sorethroat	98	96	Hydroxychloroquine, FABIFLU, IVERMECTIN, ANTIBIOTICS, VITAMIN C, ZINC, VITAMIN D, VITAMIN A	no	no	10	No	NA	DISCHARGE	16	26.2	no	no	0	clear	11.5	4700	193000	114	21.1	0.8	145	5	106	0.5	0.3	25.7	15.1	7.3	4.4	55.1	NA	less than 0.50	NA	NA	NA	NA	NA	sinus rhythm	normal	5	No
IGIB1040206523	55	female	Maharashtra	no	Nasopharyngeal swab	1970-01-01	cough, fever, sore throat	99.6	97	METHYLPREDNISOLONE, Low molecular weight heparin, Hydroxychloroquine, FABIFLU, REMDESIVIR, IVERMECTIN, ANTIBIOTICS, VITAMIN C, ZINC, VITAMIN D, VITAMIN A	no	Diabetes mellitus	10	Yes	NA	DISCHARGE	18	22.3	Non Re-Breather Mask	no	0	Basal crepitations	14.7	5500	130000	84	26.4	1.2	141	3.8	105	0.8	0.2	52.9	96.8	6.3	3.5	70.1	476	7.8	16	NA	890	NA	146.98	sinus rhythm	NA	5	No
IGIB1040206531	15	male	Maharashtra	no	Nasopharyngeal swab	1970-01-01	asymptomatic	99.3	98	Hydroxychloroquine, FABIFLU, IVERMECTIN, ANTIBIOTICS, VITAMIN C, ZINC, VITAMIN D, VITAMIN A	yes	no	14	No	NA	DISCHARGE	17	20.8	no	no	0	clear	13	5400	211000	98	26.4	0.9	144	4.5	108	0.6	0.3	96	143	6	3.3	100	NA	2.4	NA	NA	NA	NA	NA	sinus rhythm	normal	5	No
IGIB1040206532	65	female	Maharashtra	no	Nasopharyngeal swab	1970-01-01	breathlessness, fever	100	95	METHYLPREDNISOLONE, Low molecular weight heparin, Hydroxychloroquine, FABIFLU, REMDESIVIR, IVERMECTIN, ANTIBIOTICS, VITAMIN C, ZINC, VITAMIN D, VITAMIN A	no	Diabetes mellitus,Hypertension	17	Yes	NA	DISCHARGE	24	21.4	Non Re-Breather Mask	no	1	Basal crepitations	15.4	7200	183000	97	27.8	0.9	135	4.1	105	0.6	0.3	26.2	33.1	7.1	3.7	67.8	560	5.67	22	0.03	1000	2.12	365	sinus rhythm	NA	5	No
IGIB1040206533	34	female	Maharashtra	no	Nasopharyngeal swab	1970-01-01	fever, sore throat	97.3	96	METHYLPREDNISOLONE, Low molecular weight heparin, Hydroxychloroquine, FABIFLU, REMDESIVIR, IVERMECTIN, ANTIBIOTICS, VITAMIN C, ZINC, VITAMIN D, VITAMIN A	no	no	17	No	NA	DISCHARGE	20	22.5	no	no	0	clear	10.1	5700	295000	101	32.4	0.8	142	3	111	0.4	0.2	23.1	18.8	5.6	3.2	55.6	432	3.2	14	0.01	990	NA	127	sinus rhythm	NA	5	No
IGIB1040206535	24	female	Maharashtra	no	Nasopharyngeal swab	1970-01-01	fever, sore throat	98	97	METHYLPREDNISOLONE, Low molecular weight heparin, Hydroxychloroquine, FABIFLU, IVERMECTIN, ANTIBIOTICS, VITAMIN C, ZINC, VITAMIN D, VITAMIN A	no	no	11	No	NA	DISCHARGE	16	23.6	no	no	0	clear	10.7	11500	148000	125	13.5	0.8	142	5.3	109	0.5	0.2	28	13.3	7.1	3.7	144.3	NA	1.24	6	NA	NA	NA	NA	sinus rhythm	normal	5	No
IGIB1040206577	40	male	Maharashtra	no	Nasopharyngeal swab	1970-01-01	sorethroat	98.6	98	METHYLPREDNISOLONE, Low molecular weight heparin, Hydroxychloroquine, FABIFLU, IVERMECTIN, ANTIBIOTICS, VITAMIN C, ZINC, VITAMIN D, VITAMIN A	no	no	14	No	NA	DISCHARGE	17	23.2	no	no	0	clear	12.5	5400	116000	219	36.3	1.7	135	4.5	101	0.6	0.3	38.4	45.5	6.8	3.7	47.8	NA	3.45	NA	NA	870	NA	NA	sinus rhythm	normal	5	No
IGIB1040206578	23	male	Maharashtra	no	Nasopharyngeal swab	1970-01-01	sorethroat	97.6	98	METHYLPREDNISOLONE, Low molecular weight heparin, Hydroxychloroquine, FABIFLU, IVERMECTIN, ANTIBIOTICS, VITAMIN C, ZINC, VITAMIN D, VITAMIN A	no	no	13	No	NA	DISCHARGE	15	23	no	no	0	clear	15.8	9800	1`,80,000	114	23.9	1	131	3.6	105	0.3	0.1	127	120	6.1	3.7	102	NA	1.02	NA	NA	600	NA	NA	sinus rhythm	normal	5	No
IGIB1040206579	28	male	Maharashtra	no	Nasopharyngeal swab	1970-01-01	fever,cough	98.7	98	Hydroxychloroquine, FABIFLU, IVERMECTIN, ANTIBIOTICS, VITAMIN C, ZINC, VITAMIN D, VITAMIN A	yes	no	12	No	NA	DISCHARGE	16	22.1	no	no	0	clear	10.3	3400	136000	76	14.1	0.8	144	5.1	109	0.6	0.2	27.3	20.2	6.8	3.4	78.9	NA	2.67	NA	NA	500	NA	NA	sinus rhythm	normal	5	No
IGIB1040206580	33	male	Maharashtra	no	Nasopharyngeal swab	1970-01-01	fever	96.7	96	Hydroxychloroquine, FABIFLU, IVERMECTIN, ANTIBIOTICS, VITAMIN C, ZINC, VITAMIN D, VITAMIN A	no	no	14	No	NA	DISCHARGE	18	21.5	no	no	0	clear	15.8	7100	287000	104	33.9	1	140	3.7	106	0.3	0.1	29.8	56.3	6.5	3.9	65.1	NA	1.78	NA	NA	460	NA	NA	sinus rhythm	normal	5	No
IGIB1040206581	22	female	Maharashtra	no	Nasopharyngeal swab	1970-01-01	fever	98.4	97	Hydroxychloroquine, FABIFLU, IVERMECTIN, ANTIBIOTICS, VITAMIN C, ZINC, VITAMIN D, VITAMIN A	no	no	14	No	NA	DISCHARGE	17	21.6	no	no	0	clear	15.8	9700	134000	120	19.9	1.1	144	4.4	109	0.9	0.4	25	22.9	6.6	3.9	62.5	NA	2.67	7	NA	420	NA	NA	sinus rhythm	normal	5	No
IGIB1040206583	27	female	Maharashtra	no	Nasopharyngeal swab	1970-01-01	bodyache	99.8	99	Hydroxychloroquine, FABIFLU, IVERMECTIN, ANTIBIOTICS, VITAMIN C, ZINC, VITAMIN D, VITAMIN A	yes	no	12	No	NA	DISCHARGE	18	22.34	no	no	0	clear	10.1	13400	92000	201	19.6	1	133	4.4	90	0.6	0.2	23.7	20.9	6.4	3.6	43.7	250	less than 0.50	4	NA	550	NA	NA	sinus rhythm	normal	5	No
IGIB1040206584	65	female	Maharashtra	no	Nasopharyngeal swab	1970-01-01	fever, cough,breathlessness	100	95	METHYLPREDNISOLONE, Low molecular weight heparin, Hydroxychloroquine, FABIFLU, REMDESIVIR, IVERMECTIN, ANTIBIOTICS, VITAMIN C, ZINC, VITAMIN D, VITAMIN A	no	Diabetes mellitus,Ischemic Heart Disease	14	Yes	NA	DISCHARGE	24	24.5	Non Re-Breather Mask	no	1	Basal crepitations	14.4	4500	152000	107	23.4	0.9	143	5	110	1	0.4	34.6	30.9	5.7	3.1	76.8	489	45.7	22	0.5	980	1.4	254.78	sinus rhythm	NA	5	No
IGIB1040206585	54	male	Maharashtra	no	Nasopharyngeal swab	1970-01-01	fever, cough,breathlessness	99.8	96	METHYLPREDNISOLONE, Low molecular weight heparin, Hydroxychloroquine, FABIFLU, REMDESIVIR, IVERMECTIN, ANTIBIOTICS, VITAMIN C, ZINC, VITAMIN D, VITAMIN A	no	Diabetes mellitus,Hypertension	12	Yes	NA	DISCHARGE	22	23.5	Non Re-Breather Mask, High-Flow Nasal Oxygen	no	1	Basal crepitations	15.9	4680	231000	102	18.3	1	138	5.1	109	0.8	0.3	19.3	12.8	7	4.2	86	499	10.17	4	0.4	500	NA	356.6	sinus rhythm	NA	5	No
IGIB1040206601	39	male	Maharashtra	no	Nasopharyngeal swab	1970-01-01	sorethroat, cough	97.4	98	METHYLPREDNISOLONE, Low molecular weight heparin, Hydroxychloroquine, FABIFLU, REMDESIVIR, IVERMECTIN, ANTIBIOTICS, VITAMIN C, ZINC, VITAMIN D, VITAMIN A	no	no	NA	Yes	NA	DISCHARGE	18	21.1	Non Re-Breather Mask	no	0	Basal crepitations	13	7400	254000	106	20	0.9	138	4	112	0.7	0.4	24.7	22.7	6.9	3.4	67	78.9	12.8	11	NA	780	NA	32.98	sinus rhythm	NA	5	No
IGIB1040206602	43	male	Maharashtra	no	Nasopharyngeal swab	1970-01-01	bodyache, sorethroat	98.1	97	METHYLPREDNISOLONE, Low molecular weight heparin, Hydroxychloroquine, FABIFLU, REMDESIVIR, IVERMECTIN, ANTIBIOTICS, VITAMIN C, ZINC, VITAMIN D, VITAMIN A	yes	no	11	No	NA	DISCHARGE	20	22.7	no	no	0	clear	16	7300	180000	91	21.6	0.9	144	3.8	108	0.6	0.2	33.6	48.9	6.5	4.2	45.4	98	6.78	12	NA	650	0.8	76.8	sinus rhythm	NA	5	No
IGIB1040206615	55	male	Maharashtra	no	Nasopharyngeal swab	1970-01-01	cough, fever, sore throat	97.3	96	METHYLPREDNISOLONE, Low molecular weight heparin, Hydroxychloroquine, FABIFLU, REMDESIVIR, IVERMECTIN, ANTIBIOTICS, VITAMIN C, ZINC, VITAMIN D, VITAMIN A	no	Hypertension	15	Yes	NA	DISCHARGE	22	21	Non Re-Breather Mask	no	1	Basal crepitations	14.8	4900	186000	117	17.5	1.1	143	3.7	107	0.9	0.4	56.7	48.9	6.2	3.1	87.9	234	34.5	24	0.02	1000	3.65	144.78	sinus rhythm	NA	5	No
IGIB1040206617	45	female	Maharashtra	no	Nasopharyngeal swab	1970-01-01	fever, sore throat	98.7	97	METHYLPREDNISOLONE, Low molecular weight heparin, Hydroxychloroquine, FABIFLU, IVERMECTIN, ANTIBIOTICS, VITAMIN C, ZINC, VITAMIN D, VITAMIN A	no	no	12	No	NA	DISCHARGE	15	24.1	no	no	0	clear	12.8	12800	283000	385	94.1	1.8	134	4.2	104	0.5	0.2	20.6	18.5	6.5	3.6	82.5	NA	4.5	NA	NA	870	NA	NA	sinus rhythm	normal	5	No
IGIB1040206618	50	male	Maharashtra	no	Nasopharyngeal swab	1970-01-01	breathlessness	99	96	METHYLPREDNISOLONE, Low molecular weight heparin, Hydroxychloroquine, FABIFLU, REMDESIVIR, IVERMECTIN, ANTIBIOTICS, VITAMIN C, ZINC, VITAMIN D, VITAMIN A	no	Ischemic Heart Disease,Coronary artery bypass Rheumatoid arthritisft	12	Yes	NA	DISCHARGE	24	22.5	Non Re-Breather Mask	no	1	Basal crepitations	13.8	7600	280000	122	39	0.9	144	5.3	106	0.4	0.2	41.4	21.1	6	3.6	64.3	146	173.4	8	0.45	1389.7	883.4	485.16	sinus rhythm	NA	5	No
IGIB1040206619	64	male	Maharashtra	no	Nasopharyngeal swab	1970-01-01	anosmia, cough	100	97	METHYLPREDNISOLONE, Low molecular weight heparin, Hydroxychloroquine, FABIFLU, REMDESIVIR, IVERMECTIN, ANTIBIOTICS, VITAMIN C, ZINC, VITAMIN D, VITAMIN A	no	Hypertension	NA	No	NA	DISCHARGE	19	22	no	no	0	clear	18.6	8600	234000	130	22.1	0.8	138	4.6	109	0.4	0.1	24.3	31.7	5.5	3.1	95	25.8	13.34	14	NA	600	NA	220.3	sinus rhythm	normal	5	No
IGIB1040206632	33	male	Maharashtra	no	Nasopharyngeal swab	1970-01-01	fever, bodyache	97.8	98	METHYLPREDNISOLONE, Low molecular weight heparin, Hydroxychloroquine, FABIFLU, REMDESIVIR, IVERMECTIN, ANTIBIOTICS, VITAMIN C, ZINC, VITAMIN D, VITAMIN A	yes	no	12	No	NA	DISCHARGE	20	23.7	no	no	0	Basal crepitations	16.2	3500	99000	106	17.4	1	145	4.5	111	0.3	0.1	36.9	54.9	6.7	3.8	65	16.8	9.76	9	NA	760	NA	45.98	sinus rhythm	normal	5	No
IGIB1040206637	57	male	Maharashtra	no	Nasopharyngeal swab	1970-01-01	breathlessness & myalgia	98.3	96	METHYLPREDNISOLONE, Low molecular weight heparin, Hydroxychloroquine, FABIFLU, REMDESIVIR, IVERMECTIN, ANTIBIOTICS, VITAMIN C, ZINC, VITAMIN D, VITAMIN A	no	Diabetes mellitus,Ischemic Heart Disease,Hypertension	12	Yes	NA	DISCHARGE	22	23	Non Re-Breather Mask	no	1	Basal crepitations	14.7	12400	135000	117	37.7	1.1	141	4.9	101	0.6	0.3	113.4	118.7	6.1	3.3	83.8	97.8	176.9	26	0.2	660	4.67	112.87	sinus rhythm	NA	5	No
IGIB1040206638	40	male	Maharashtra	no	Nasopharyngeal swab	1970-01-01	fever, sore throat	99.2	97	METHYLPREDNISOLONE, Low molecular weight heparin, Hydroxychloroquine, FABIFLU, REMDESIVIR, IVERMECTIN, ANTIBIOTICS, VITAMIN C, ZINC, VITAMIN D, VITAMIN A	no	no	11	No	NA	DISCHARGE	18	23.3	no	no	0	Basal crepitations	13.9	9400	126000	111	40.2	1.2	144	3.9	109	0.4	0.2	30.9	36.5	5.9	3.7	52.9	17.4	50	6	NA	1200	376.9	36.7	sinus rhythm	NA	5	No
IGIB1040206639	77	male	Maharashtra	no	Nasopharyngeal swab	1970-01-01	breathlessness	98.6	95	METHYLPREDNISOLONE, Low molecular weight heparin, Hydroxychloroquine, FABIFLU, REMDESIVIR, TOCILIZUMAB, IVERMECTIN, ANTIBIOTICS, VITAMIN C, ZINC, VITAMIN D, VITAMIN A	no	Diabetes mellitus,Hypertension,Coronary artery bypass Rheumatoid arthritisft,Chronic kidney disease	8	Yes	NA	DEATH	26	21.2	Non Re-Breather Mask, High-Flow Nasal Oxygen	Non-invasive ventilation, Intubated	1	Basal crepitations	14.1	12300	93000	83	64.5	1.6	138	104	111	0.3	0.2	62.8	48.5	4.8	2.7	56.2	267	103.99	22	7.76	1640	4967.8	302	sinus rhythm	NA	5	No
IGIB1040206641	43	male	Maharashtra	no	Nasopharyngeal swab	1970-01-01	breathlessness and cough	96.5	96	METHYLPREDNISOLONE, Low molecular weight heparin, Hydroxychloroquine, FABIFLU, REMDESIVIR, TOCILIZUMAB, IVERMECTIN, ANTIBIOTICS, VITAMIN C, ZINC, VITAMIN D, VITAMIN A	no	Hypertension	19	Yes	NA	DISCHARGE	24	22.3	Non Re-Breather Mask, High-Flow Nasal Oxygen	no	1	Basal crepitations	13.5	16400	450000	190	23.9	0.9	135	4	97	1.1	0.5	53.9	48.7	6.5	3.1	78.7	356	160.88	NA	5.89	1410	NA	388	sinus rhythm	NA	5	No
IGIB1040206663	58	male	Maharashtra	no	Nasopharyngeal swab	1970-01-01	breathlessness & myalgia	97.8	97	METHYLPREDNISOLONE, Low molecular weight heparin, Hydroxychloroquine, FABIFLU, REMDESIVIR, IVERMECTIN, ANTIBIOTICS, VITAMIN C, ZINC, VITAMIN D, VITAMIN A	no	Diabetes mellitus,Hypertension	15	Yes	NA	DISCHARGE	22	21.6	Non Re-Breather Mask, High-Flow Nasal Oxygen	no	1	Basal crepitations	10.3	18100	264000	145	46.8	1.3	140	4.4	110	0.6	0.2	47.7	68.7	6.4	3.2	101.6	660	27.3	10	0.9	780	260.99	56.7	sinus rhythm	NA	5	No
IGIB1040206666	38	male	Maharashtra	no	Nasopharyngeal swab	1970-01-01	sorethroat, cough	96	96	METHYLPREDNISOLONE, Hydroxychloroquine, FABIFLU, IVERMECTIN, ANTIBIOTICS, VITAMIN C, ZINC, VITAMIN D, VITAMIN A	no	no	12	No	NA	DISCHARGE	18	23.4	no	no	0	clear	12.7	5600	102000	76	33.9	1.1	139	4.4	109	0.5	0.1	74.1	45.1	6.6	3.9	100.2	NA	122.78	NA	NA	340	NA	230	sinus rhythm	normal	5	No
IGIB1040206667	50	male	Maharashtra	no	Nasopharyngeal swab	1970-01-01	fever, sore throat	97.3	96	METHYLPREDNISOLONE, Low molecular weight heparin, Hydroxychloroquine, FABIFLU, IVERMECTIN, ANTIBIOTICS, VITAMIN C, ZINC, VITAMIN D, VITAMIN A	no	Diabetes mellitus	13	No	NA	DISCHARGE	19	22.3	no	no	0	clear	14.8	3400	345000	265	43.6	1.2	143	3.6	107	0.4	0.1	34.8	43.6	6.5	3.2	68.9	1038	84.6	22	12.54	720	NA	248	sinus rhythm	normal	5	No
IGIB104020668	45	male	Maharashtra	no	Nasopharyngeal swab	1970-01-01	fever,cough	98.2	98	METHYLPREDNISOLONE, Low molecular weight heparin, Hydroxychloroquine, FABIFLU, REMDESIVIR, TOCILIZUMAB, IVERMECTIN, ANTIBIOTICS, VITAMIN C, ZINC, VITAMIN D, VITAMIN A	no	no	1	Yes	NA	NA	26	24.8	no	Non-invasive ventilation	1	Basal crepitations	16.8	10800	259000	84	NA	NA	NA	NA	NA	NA	NA	NA	NA	NA	NA	NA	NA	less than 0.50	NA	0.03	NA	38.93	NA	sinus rhythm	normal	4	No
IGIB1040206687	63	male	Maharashtra	no	Nasopharyngeal swab	1970-01-01	fever, bodyache	97.1	97	METHYLPREDNISOLONE, Low molecular weight heparin, Hydroxychloroquine, FABIFLU, IVERMECTIN, ANTIBIOTICS, VITAMIN C, ZINC, VITAMIN D, VITAMIN A	no	Hypertension,Ischemic Heart Disease	12	No	NA	DISCHARGE	20	22.1	no	no	0	clear	12.3	5800	226000	74	18.9	0.8	142	3.8	109	0.8	0.2	18.5	18.3	6.7	3.7	61.4	425	more than0.50	4	0.5	680	NA	NA	sinus rhythm	normal	5	No
IGIB10402066881	57	male	Maharashtra	no	Nasopharyngeal swab	1970-01-01	fever, breathlessness	98.7	98	METHYLPREDNISOLONE, Low molecular weight heparin, Hydroxychloroquine, FABIFLU, REMDESIVIR, IVERMECTIN, ANTIBIOTICS, VITAMIN C, ZINC, VITAMIN D, VITAMIN A	yes	no	1	Yes	NA	NA	22	25.6	yes	no	0	Basal crepitations	NA	NA	NA	NA	NA	NA	NA	NA	NA	NA	NA	NA	NA	NA	NA	NA	NA	NA	NA	NA	NA	3.68	NA	sinus rhythm	normal	5	No
IGIB1040206688	24	male	Maharashtra	no	Nasopharyngeal swab	1970-01-01	cough, fever, sore throat	98.7	96	METHYLPREDNISOLONE, Low molecular weight heparin, Hydroxychloroquine, FABIFLU, IVERMECTIN, ANTIBIOTICS, VITAMIN C, ZINC, VITAMIN D, VITAMIN A	no	no	11	No	NA	DISCHARGE	16	24.6	no	no	0	clear	14.5	4000	132000	130	13.7	0.8	136	4.4	106	0.5	0.2	55	42	5.5	3.4	51	NA	6.89	7	NA	740	NA	NA	sinus rhythm	normal	5	No
IGIB1040206691	25	male	Maharashtra	no	Nasopharyngeal swab	1970-01-01	fever	98	98	METHYLPREDNISOLONE, Low molecular weight heparin, Hydroxychloroquine, FABIFLU, IVERMECTIN, ANTIBIOTICS, VITAMIN C, ZINC, VITAMIN D, VITAMIN A	no	no	11	No	NA	DISCHARGE	16	25.4	no	no	0	clear	15	6400	138000	94	28	1.3	139	6	109	0.4	0.2	47.6	72.8	6.8	4.1	51.2	666	1.89	12	NA	760	6.7	214.44	sinus rhythm	normal	5	No
IGIB1040206693	37	female	Maharashtra	no	Nasopharyngeal swab	1970-01-01	sorethroat, cough	99.6	94	METHYLPREDNISOLONE, Low molecular weight heparin, Hydroxychloroquine, FABIFLU, REMDESIVIR, IVERMECTIN, ANTIBIOTICS, VITAMIN C, ZINC, VITAMIN D, VITAMIN A	no	no	14	No	NA	DISCHARGE	20	23.5	no	no	0	Basal crepitations	15.9	6200	127000	121	47.5	1.3	143	4.8	108	0.5	0.2	81.3	70	5.9	3.8	44.1	933	58.1	8	NA	900	NA	47.99	sinus rhythm	NA	5	No
IGIB1040206712	67	female	Maharashtra	no	Nasopharyngeal swab	1970-01-01	fever, bodyache	99.3	97	METHYLPREDNISOLONE, Low molecular weight heparin, Hydroxychloroquine, FABIFLU, REMDESIVIR, IVERMECTIN, ANTIBIOTICS, VITAMIN C, ZINC, VITAMIN D, VITAMIN A	no	Diabetes mellitus,Hypertension	15	No	NA	DISCHARGE	18	24.6	no	no	0	clear	13.4	4140	188000	96	21.8	1	148	4.1	108	0.3	0.1	22.2	14.8	6.6	3.9	58.5	467	3.66	NA	NA	1000	NA	167.8	sinus rhythm	NA	5	No
IGIB1040206732	44	male	Maharashtra	no	Nasopharyngeal swab	1970-01-01	breathlessness and cough	100	96	METHYLPREDNISOLONE, Low molecular weight heparin, Hydroxychloroquine, FABIFLU, REMDESIVIR, IVERMECTIN, ANTIBIOTICS, VITAMIN C, ZINC, VITAMIN D, VITAMIN A	no	Hypertension	2	Yes	NA	DAMA	24	22.3	Non Re-Breather Mask	no	1	Basal crepitations	14.6	6500	224000	145	14.4	0.7	142	4.3	102	0.7	0.3	23.4	21.5	5.7	3	43.6	NA	1.45	NA	NA	1045	NA	NA	sinus rhythm	NA	5	No
IGIB1040206734	65	female	Maharashtra	no	Nasopharyngeal swab	1970-01-01	breathlessness	97.3	97	METHYLPREDNISOLONE, Low molecular weight heparin, Hydroxychloroquine, FABIFLU, REMDESIVIR, IVERMECTIN, ANTIBIOTICS, VITAMIN C, ZINC, VITAMIN D, VITAMIN A	no	Ischemic Heart Disease,Hypertension	16	Yes	NA	DISCHARGE	22	21.5	Non Re-Breather Mask	no	1	Basal crepitations	11.2	6700	274000	217	18	0.8	139	5.3	98	0.7	0.4	34.7	27.9	6.4	3.1	65.7	324	6.78	4	0.01	670	45.89	144.78	sinus rhythm	NA	5	No
IGIB1040206735	35	male	Maharashtra	no	Nasopharyngeal swab	1970-01-01	breathlessness and cough	98	95	METHYLPREDNISOLONE, Low molecular weight heparin, Hydroxychloroquine, FABIFLU, REMDESIVIR, IVERMECTIN, ANTIBIOTICS, VITAMIN C, ZINC, VITAMIN D, VITAMIN A	yes	no	10	Yes	NA	DAMA	20	23	Non Re-Breather Mask, High-Flow Nasal Oxygen	no	0	Basal crepitations	14.2	2500	205000	99	24.8	0.8	142	4.8	110	0.5	0.2	23.6	21.6	6.8	3.4	56.8	223	23.6	8	0.3	860	NA	NA	sinus rhythm	NA	5	No
IGIB1040206736	55	male	Maharashtra	no	Nasopharyngeal swab	1970-01-01	cough	98.6	97	METHYLPREDNISOLONE, Low molecular weight heparin, Hydroxychloroquine, FABIFLU, REMDESIVIR, IVERMECTIN, ANTIBIOTICS, VITAMIN C, ZINC, VITAMIN D, VITAMIN A	yes	Hypertension	12	Yes	NA	DISCHARGE	18	21.3	Non Re-Breather Mask	no	0	Basal crepitations	15.6	7600	269000	134	34.6	1.1	140	3.6	109	0.7	0.4	43.6	41.1	7.1	3.6	76.8	NA	54.6	NA	NA	940	NA	NA	sinus rhythm	NA	5	No
IGIB1040206738	13	female	Maharashtra	no	Nasopharyngeal swab	1970-01-01	fever, bodyache	97.6	98	Hydroxychloroquine, FABIFLU, IVERMECTIN, ANTIBIOTICS, VITAMIN C, ZINC, VITAMIN D, VITAMIN A	yes	no	10	No	NA	DISCHARGE	16	23.8	no	no	0	clear	14.1	7500	159000	90	23.6	1.3	138	3.6	104	0.4	0.2	32.4	30.9	6.8	3.1	34.5	NA	3.21	4	NA	460	NA	23.4	sinus rhythm	normal	5	No
IGIB1040206740	51	male	Maharashtra	no	Nasopharyngeal swab	1970-01-01	fever	98.7	96	METHYLPREDNISOLONE, Low molecular weight heparin, Hydroxychloroquine, FABIFLU, IVERMECTIN, ANTIBIOTICS, VITAMIN C, ZINC, VITAMIN D, VITAMIN A	no	Diabetes mellitus	10	Yes	NA	DISCHARGE	18	21.5	Non Re-Breather Mask	no	0	Basal crepitations	13.8	7600	280000	122	39	0.9	144	5.3	106	0.4	0.2	41.4	21.1	6	3.6	64.3	134	1.24	NA	NA	800	2.5	102.65	sinus rhythm	NA	5	No
IGIB1040206742	23	male	Maharashtra	no	Nasopharyngeal swab	1970-01-01	fever, headache	96.7	98	Hydroxychloroquine, FABIFLU, IVERMECTIN, ANTIBIOTICS, VITAMIN C, ZINC, VITAMIN D, VITAMIN A	yes	no	10	No	NA	DISCHARGE	15	22.4	no	no	0	clear	9.7	9700	283000	92	38.2	1	138	5.2	105	0.4	0.2	38.3	19.3	6.2	3.3	39	86.5	less than 0.50	NA	0.01	450	NA	52.5	sinus rhythm	normal	5	No
IGIB1040206749	50	female	Maharashtra	no	Nasopharyngeal swab	1970-01-01	asymptomatic	98.4	99	Hydroxychloroquine, FABIFLU, IVERMECTIN, ANTIBIOTICS, VITAMIN C, ZINC, VITAMIN D, VITAMIN A	yes	Diabetes mellitus,Hypertension	13	No	NA	DISCHARGE	17	25.8	no	no	0	clear	10.2	2800	324000	142	19.7	0.8	133	2.8	95	NA	NA	NA	NA	NA	NA	NA	NA	2.6	NA	NA	NA	NA	NA	sinus rhythm	normal	5	No
IGIB1040206750	45	male	Maharashtra	no	Nasopharyngeal swab	1970-01-01	cold, cough, fever	99.8	97	METHYLPREDNISOLONE, Low molecular weight heparin, Hydroxychloroquine, FABIFLU, REMDESIVIR, IVERMECTIN, ANTIBIOTICS, VITAMIN C, ZINC, VITAMIN D, VITAMIN A	yes	no	11	No	NA	DISCHARGE	18	22.7	no	no	0	clear	16.2	13100	223000	144	18.6	1.1	142	4.7	99	0.9	0.3	55.3	68	5.8	3	162.7	98.4	12.56	8	0.05	780	3.6	147.9	sinus rhythm	normal	5	No
IGIB1040206757	72	female	Maharashtra	no	Nasopharyngeal swab	1970-01-01	breathlessness	100	95	METHYLPREDNISOLONE, Low molecular weight heparin, Hydroxychloroquine, FABIFLU, REMDESIVIR, IVERMECTIN, ANTIBIOTICS, VITAMIN C, ZINC, VITAMIN D, VITAMIN A	no	Hypertension,Diabetes mellitus,Ischemic Heart Disease	13	Yes	NA	DISCHARGE	22	21.6	Non Re-Breather Mask, High-Flow Nasal Oxygen	no	1	Basal crepitations	9.6	9200	432000	81	72.7	2.4	137	4.6	103	0.4	0.2	34.6	42.1	5.9	3.2	70.1	591.1	54.8	NA	0.6	3490	267.89	561.34	sinus rhythm	NA	5	No
IGIB1040206758	46	female	Maharashtra	no	Nasopharyngeal swab	1970-01-01	fever, sore throat	99.8	96	Hydroxychloroquine, FABIFLU, IVERMECTIN, ANTIBIOTICS, VITAMIN C, ZINC, VITAMIN D, VITAMIN A	no	no	12	No	NA	DISCHARGE	16	23.4	no	no	0	clear	12.3	5600	267000	93	32.1	0.9	140	3.6	112	0.5	0.1	43.5	41.6	6.4	3.1	100.2	680.1	2.4	NA	NA	500	NA	NA	sinus rhythm	normal	5	No
IGIB1040206762	65	male	Maharashtra	no	Nasopharyngeal swab	1970-01-01	fever, cough,breathlessness	97.4	96	METHYLPREDNISOLONE, Low molecular weight heparin, Hydroxychloroquine, FABIFLU, REMDESIVIR, IVERMECTIN, ANTIBIOTICS, VITAMIN C, ZINC, VITAMIN D, VITAMIN A	no	Hypertension,Ischemic Heart Disease	13	Yes	NA	DISCHARGE	20	24.5	Non Re-Breather Mask	no	0	Basal crepitations	13.7	3600	195000	157	57.1	1.1	139	6	104	0.5	0.2	35	31	6.9	3.6	66.5	681	4.9	NA	0.07	1000	NA	90.7	sinus rhythm	NA	5	No
IGIB1040206773	25	female	Maharashtra	no	Nasopharyngeal swab	1970-01-01	fever, headache	98.1	97	Hydroxychloroquine, FABIFLU, IVERMECTIN, ANTIBIOTICS, VITAMIN C, ZINC, VITAMIN D, VITAMIN A	yes	no	12	No	NA	DISCHARGE	16	23.5	no	no	0	clear	14.5	6500	324000	98	34.5	1	140	3.9	110	0.7	0.4	45.6	41.4	5.8	3.1	117	NA	less than 0.50	NA	NA	NA	NA	NA	sinus rhythm	normal	5	No
IGIB1040206774	47	female	Maharashtra	no	Nasopharyngeal swab	1970-01-01	bodyache, sorethroat	97.3	94	Hydroxychloroquine, FABIFLU, IVERMECTIN, ANTIBIOTICS, VITAMIN C, ZINC, VITAMIN D, VITAMIN A	no	Hypertension	11	No	NA	DISCHARGE	18	21.1	no	no	0	clear	13.2	9700	184000	76	21	0.8	136	3.4	98	0.6	0.3	13.4	11.3	5	3.1	132.7	NA	2.12	NA	NA	NA	NA	NA	sinus rhythm	normal	5	No
IGIB1040206775	62	female	Maharashtra	no	Nasopharyngeal swab	1970-01-01	fever, breathlessness	98.7	96	METHYLPREDNISOLONE, Low molecular weight heparin, Hydroxychloroquine, FABIFLU, REMDESIVIR, IVERMECTIN, ANTIBIOTICS, VITAMIN C, ZINC, VITAMIN D, VITAMIN A	no	Diabetes mellitus,Ischemic Heart Disease,Hypertension	11	Yes	NA	DISCHARGE	20	22.7	Non Re-Breather Mask	no	0	Basal crepitations	10.8	19900	216000	112	48.9	1.2	144	5.8	112	2.7	1.7	42.4	60.5	5.7	3.3	98.2	299	124	6	3.08	1056	1767	289.56	sinus rhythm	NA	5	No
IGIB1040206776	9	female	Maharashtra	no	Nasopharyngeal swab	1970-01-01	asymptomatic	99	98	Hydroxychloroquine, FABIFLU, IVERMECTIN, ANTIBIOTICS, VITAMIN C, ZINC, VITAMIN D, VITAMIN A	yes	no	10	No	NA	DISCHARGE	18	21	no	no	0	clear	16.5	5800	273000	234	71.5	2.3	134	3.7	101	0.6	0.2	107.9	178	6.2	3.7	45.4	NA	less than 0.50	NA	NA	NA	NA	NA	sinus rhythm	normal	5	No
IGIB1040206777	32	female	Maharashtra	no	Nasopharyngeal swab	1970-01-01	headache, fever	100	97	METHYLPREDNISOLONE, Low molecular weight heparin, Hydroxychloroquine, FABIFLU, REMDESIVIR, IVERMECTIN, ANTIBIOTICS, VITAMIN C, ZINC, VITAMIN D, VITAMIN A	no	no	9	No	NA	DISCHARGE	17	24.1	no	no	0	clear	13.4	5600	277000	105	19.9	0.8	138	5	106	0.5	0.4	18.1	17	6.8	3.9	61.8	NA	2.65	NA	NA	980	NA	145.67	sinus rhythm	normal	5	No
IGIB1040206780	5	male	Maharashtra	no	Nasopharyngeal swab	1970-01-01	asymptomatic	97.8	98	Hydroxychloroquine, FABIFLU, IVERMECTIN, ANTIBIOTICS, VITAMIN C, ZINC, VITAMIN D, VITAMIN A	yes	no	10	No	NA	DISCHARGE	20	22.5	no	no	0	clear	13.4	6500	432000	180	23.1	0.9	140	4	110	0.8	0.5	32	34.8	5.4	3.2	112	102	less than 0.50	2	NA	NA	NA	NA	sinus rhythm	normal	5	No
IGIB1040206781	58	male	Maharashtra	no	Nasopharyngeal swab	1970-01-01	fever, sore throat	98.3	94	METHYLPREDNISOLONE, Low molecular weight heparin, Hydroxychloroquine, FABIFLU, REMDESIVIR, IVERMECTIN, ANTIBIOTICS, VITAMIN C, ZINC, VITAMIN D, VITAMIN A	no	Hypertension,Diabetes mellitus	9	Yes	NA	DISCHARGE	22	22	Non Re-Breather Mask	no	1	Basal crepitations	14.7	5500	130000	84	26.4	1.2	141	3.8	105	0.8	0.2	52.9	96.8	6.3	3.5	70.1	934	45.4	NA	NA	2100	NA	329.5	sinus rhythm	NA	5	No
IGIB1040206784	40	male	Maharashtra	no	Nasopharyngeal swab	1970-01-01	breathlessness	99.2	95	METHYLPREDNISOLONE, Low molecular weight heparin, Hydroxychloroquine, FABIFLU, REMDESIVIR, IVERMECTIN, ANTIBIOTICS, VITAMIN C, ZINC, VITAMIN D, VITAMIN A	no	no	18	Yes	NA	DISCHARGE	24	23.7	Non Re-Breather Mask, High-Flow Nasal Oxygen	no	1	Basal crepitations	4.5	3600	98000	109	34.6	1.1	133	4.2	104	0.4	0.2	17.3	16.4	5.6	3.8	53.2	2000	less than 0.50	12	0.1	1500	5.6	2378.9	sinus rhythm	NA	5	No
IGIB1040206785	41	male	Maharashtra	no	Nasopharyngeal swab	1970-01-01	sorethroat, cough	98.6	94	METHYLPREDNISOLONE, Low molecular weight heparin, Hydroxychloroquine, FABIFLU, REMDESIVIR, IVERMECTIN, ANTIBIOTICS, VITAMIN C, ZINC, VITAMIN D, VITAMIN A	no	no	10	No	NA	DISCHARGE	20	23	no	no	0	clear	12.5	4500	234000	87	30.9	0.9	145	3.8	98	0.8	0.5	56.7	48.9	6.7	3.2	67.9	470	34.5	10	0.5	1380	NA	478.34	sinus rhythm	normal	5	No
IGIB1040206786	35	female	Maharashtra	no	Nasopharyngeal swab	1970-01-01	headache, fever	96.5	97	Hydroxychloroquine, FABIFLU, IVERMECTIN, ANTIBIOTICS, VITAMIN C, ZINC, VITAMIN D, VITAMIN A	yes	no	14	No	NA	DISCHARGE	18	23.3	no	no	0	clear	10.3	3400	136000	76	14.1	0.8	144	5.1	109	0.6	0.2	27.3	20.2	6.8	3.4	78.9	NA	2.67	NA	NA	500	NA	NA	sinus rhythm	normal	5	No
IGIB1040206804	26	male	Maharashtra	no	Nasopharyngeal swab	1970-01-01	fever	98.6	96	METHYLPREDNISOLONE, Low molecular weight heparin, Hydroxychloroquine, FABIFLU, IVERMECTIN, ANTIBIOTICS, VITAMIN C, ZINC, VITAMIN D, VITAMIN A	no	no	12	No	NA	DISCHARGE	18	24.5	no	no	0	clear	14.1	12300	93000	83	64.5	1.6	138	104	111	0.3	0.2	62.8	48.5	4.8	2.7	56.2	267	103.99	22	7.76	1640	4967.8	302	sinus rhythm	normal	5	No
IGIB1040206805	70	female	Maharashtra	no	Nasopharyngeal swab	1970-01-01	cough, fever, sore throat	96	98	METHYLPREDNISOLONE, Low molecular weight heparin, Hydroxychloroquine, FABIFLU, IVERMECTIN, ANTIBIOTICS, VITAMIN C, ZINC, VITAMIN D, VITAMIN A	no	Hypertension	18	No	NA	DISCHARGE	20	22.3	no	no	0	clear	13.5	16400	450000	190	23.9	0.9	135	4	97	1.1	0.5	53.9	48.7	6.5	3.1	78.7	356	160.88	NA	5.89	1410	NA	388	sinus rhythm	normal	5	No
IGIB1040206816	72	male	Maharashtra	no	Nasopharyngeal swab	1970-01-01	asymptomatic	97.3	98	METHYLPREDNISOLONE, Low molecular weight heparin, Hydroxychloroquine, FABIFLU, IVERMECTIN, ANTIBIOTICS, VITAMIN C, ZINC, VITAMIN D, VITAMIN A	yes	Diabetes mellitus,Hypertension	12	No	NA	DISCHARGE	16	21.6	no	no	0	clear	10.3	18100	264000	145	46.8	1.3	140	4.4	110	0.6	0.2	47.7	68.7	6.4	3.2	101.6	660	27.3	10	0.9	780	260.99	56.7	sinus rhythm	normal	5	No
IGIB1040206820	54	female	Maharashtra	no	Nasopharyngeal swab	1970-01-01	cold, cough, fever	97.1	96	METHYLPREDNISOLONE, Low molecular weight heparin, Hydroxychloroquine, FABIFLU, REMDESIVIR, TOCILIZUMAB, IVERMECTIN, ANTIBIOTICS, VITAMIN C, ZINC, VITAMIN D, VITAMIN A	no	Diabetes mellitus	11	No	NA	DISCHARGE	18	23.5	no	no	0	clear	14.2	11200	250000	245	19.5	0.5	142	4.7	106	0.3	0.1	33.2	37.5	6.5	3.2	132	420.8	57.8	14	0.4	1346	NA	21	sinus rhythm	normal	5	No
IGIB1040206877	55	male	Maharashtra	no	Nasopharyngeal swab	1970-01-01	fever, sore throat	97.8	95	METHYLPREDNISOLONE, Low molecular weight heparin, Hydroxychloroquine, FABIFLU, IVERMECTIN, ANTIBIOTICS, VITAMIN C, ZINC, VITAMIN D, VITAMIN A	no	Diabetes mellitus,Ischemic Heart Disease	13	No	NA	DISCHARGE	20	22.3	no	no	0	clear	12.3	3800	201000	131	25.9	0.3	142	5.2	105	0.8	0.4	43.2	32.1	5.4	3.2	56.5	NA	16.9	NA	NA	NA	NA	NA	sinus rhythm	normal	5	No
IGIB1040206878	42	female	Maharashtra	no	Nasopharyngeal swab	1970-01-01	asymptomatic	98.3	97	Hydroxychloroquine, FABIFLU, IVERMECTIN, ANTIBIOTICS, VITAMIN C, ZINC, VITAMIN D, VITAMIN A	no	Hypertension	13	No	NA	DISCHARGE	16	23.4	no	no	0	clear	12.3	5800	226000	74	18.9	0.8	142	3.8	109	0.8	0.2	18.5	18.3	6.7	3.7	61.4	NA	2.4	NA	NA	NA	NA	NA	sinus rhythm	normal	5	No
IGIB1040207367	42	male	Maharashtra	no	Nasopharyngeal swab	1970-01-01	breathlessness and cough	98.7	97	METHYLPREDNISOLONE, Low molecular weight heparin, Hydroxychloroquine, FABIFLU, REMDESIVIR, IVERMECTIN, ANTIBIOTICS, VITAMIN C, ZINC, VITAMIN D, VITAMIN A	yes	no	NA	Yes	NA	NA	24	24.6	yes	no	1	Basal crepitations	14.9	9200	459000	109	109.4	1.4	146	4.7	113	0.4	0.2	46.9	29.3	6.2	3.9	54.2	470	15.8	6	NA	568	1132	NA	sinus rhythm	normal	5	No
IGIB1040207708	26	male	Maharashtra	no	Nasopharyngeal swab	1970-01-01	asymptomatic	98.5	100	Hydroxychloroquine, FABIFLU, ANTIBIOTICS, VITAMIN C, ZINC, VITAMIN D, VITAMIN A	no	no	11	No	NA	DISCHARGE	18	21	no	no	0	no any	10.6	24700	280000	204	42.1	0.9	139	4.4	111	0.8	0.2	43.6	34.9	5.8	2.9	69.3	NA	2.4	NA	NA	NA	NA	NA	sinus rhythm	normal	NA	No
IGIB1040207786	28	male	Maharashtra	no	Nasopharyngeal swab	1970-01-01	fever,cough	101	99	METHYLPREDNISOLONE, Low molecular weight heparin, Hydroxychloroquine, FABIFLU, REMDESIVIR, IVERMECTIN, ANTIBIOTICS, VITAMIN C, ZINC, VITAMIN D, VITAMIN A	yes	no	17	Yes	NA	DISCHARGE	22	23	Non Re-Breather Mask	no	1	Basal crepitations	15.9	4900	197000	93	32.9	1.1	143	4.4	108	0.5	0.2	28.6	44.5	6.5	4.1	73.3	460	2.79	3.2	0.02	419.73	4.4	NA	sinus rhythm	normal	6	No
IGIB1040207868	19	female	Maharashtra	no	Nasopharyngeal swab	1970-01-01	asymptomatic	97	98	Hydroxychloroquine, FABIFLU, ANTIBIOTICS, VITAMIN C, ZINC, VITAMIN D, VITAMIN A	no	no	11	No	NA	DISCHARGE	20	22	no	no	0	no any	13.8	5900	73000	104	29.1	1.2	134	4.3	110	1.1	0.5	161.9	68.2	5.8	3.5	84.4	NA	1.67	NA	NA	NA	NA	NA	sinus rhythm	normal	NA	No
IGIB1040207896	38	male	Maharashtra	no	Nasopharyngeal swab	1970-01-01	asymptomatic	96.9	100	Hydroxychloroquine, FABIFLU, ANTIBIOTICS, VITAMIN C, ZINC, VITAMIN D, VITAMIN A	no	no	11	No	NA	DISCHARGE	14	24.1	no	no	0	no any	13.6	7900	374000	309	29.9	0.9	134	5.3	101	0.8	0.3	43.4	29.7	5.7	3.4	107	NA	0.46	NA	NA	NA	NA	NA	sinus rhythm	normal	NA	No
IGIB1040207980	47	male	Maharashtra	no	Nasopharyngeal swab	1970-01-01	asymptomatic	98	99	Hydroxychloroquine, FABIFLU, ANTIBIOTICS, VITAMIN C, ZINC, VITAMIN D, VITAMIN A	no	no	11	No	NA	DISCHARGE	17	21.6	no	no	0	no any	16	7300	180000	91	21.6	0.9	144	3.8	108	0.6	0.2	33.6	48.9	6.5	4.2	45.4	NA	0.6	NA	NA	NA	NA	NA	sinus rhythm	normal	NA	No
IGIB1040207982	59	female	Maharashtra	no	Nasopharyngeal swab	1970-01-01	breathlessness	96.5	94	METHYLPREDNISOLONE, Low molecular weight heparin, Hydroxychloroquine, FABIFLU, IVERMECTIN, ANTIBIOTICS, VITAMIN C, ZINC, VITAMIN D, VITAMIN A	yes	Interstitial Lung Disease,Rheumatoid arthritis	NA	Yes	NA	DEATH	28	22.4	no	Non-invasive ventilation	1	Basal crepitations	NA	NA	NA	NA	NA	NA	NA	NA	NA	NA	NA	NA	NA	NA	NA	NA	650	17.8	8	0.32	1468	117.5	NA	sinus rhythm	normal	5	No
IGIB1040208021	68	male	Maharashtra	no	Nasopharyngeal swab	1970-01-01	fever, cough,breathlessness	99.8	98	METHYLPREDNISOLONE, Low molecular weight heparin, Hydroxychloroquine, FABIFLU, REMDESIVIR, IVERMECTIN, ANTIBIOTICS, VITAMIN C, ZINC, VITAMIN D, VITAMIN A	no	Hypertension,Ischemic Heart Disease	6	Yes	NA	DEATH	24	25.6	Non Re-Breather Mask, High-Flow Nasal Oxygen	Non-invasive ventilation, Intubaion	1	Basal crepitations	13.6	8400	537000	134	176	4.7	142	6	110	0.8	0.2	67.8	24.9	6	3.4	76.9	957	124.9	20	0.5	10000	20.9	2167.89	bradycardia	normal	5	No
IGIB1040208053	58	female	Maharashtra	no	Nasopharyngeal swab	1970-01-01	myalgia	97.7	98	METHYLPREDNISOLONE, Low molecular weight heparin, Hydroxychloroquine, FABIFLU, IVERMECTIN, ANTIBIOTICS, VITAMIN C, ZINC, VITAMIN D, VITAMIN A	yes	no	1	No	NA	DAMA	18	24.9	no	no	0	clear	13.4	7600	156000	112	23.4	0.9	NA	NA	NA	NA	NA	NA	NA	NA	NA	NA	NA	NA	NA	NA	NA	NA	NA	sinus rhythm	normal	5	No
IGIB1040208074	29	male	Maharashtra	no	Nasopharyngeal swab	1970-01-01	asymptomatic	97	100	METHYLPREDNISOLONE, Low molecular weight heparin, Hydroxychloroquine, FABIFLU, IVERMECTIN, ANTIBIOTICS, VITAMIN C, ZINC, VITAMIN D, VITAMIN A	yes	no	12	No	NA	DISCHARGE	16	22.1	no	no	0	no any	16	7300	180000	91	21.6	0.9	144	3.8	108	0.6	0.2	33.6	48.9	6.5	4.2	45.4	NA	less than 0.50	NA	NA	NA	NA	NA	sinus rhythm	normal	0	No
IGIB1040208427	52	male	Maharashtra	no	Nasopharyngeal swab	1970-01-01	breathlessness and cough	100	94	METHYLPREDNISOLONE, Low molecular weight heparin, Hydroxychloroquine, FABIFLU, REMDESIVIR, TOCILIZUMAB, IVERMECTIN, ANTIBIOTICS, VITAMIN C, ZINC, VITAMIN D, VITAMIN A	no	Diabetes mellitus,Ischemic Heart Disease,Hypertension	NA	Yes	NA	DEATH	28	21.2	High-Flow Nasal Oxygen	Non-invasive ventilation, Intubation	2	Basal crepitations	16.4	25200	281000	142	58.4	1	145	4	109	0.6	0.3	53.2	69.4	5.4	3	151	NA	79.8	10	0.03	7084	29.68	982.9	sinus rhythm	normal	6	No
IGIB1040208799	42	male	Maharashtra	no	Nasopharyngeal swab	1970-01-01	fever,cough	100	100	METHYLPREDNISOLONE, Low molecular weight heparin, Hydroxychloroquine, FABIFLU, REMDESIVIR, IVERMECTIN, ANTIBIOTICS, VITAMIN C, ZINC, VITAMIN D, VITAMIN A	yes	Diabetes mellitus	NA	Yes	NA	NA	18	22.3	yes	no	0	no any	16.5	5800	273000	234	71.5	2.3	134	3.7	101	0.6	0.2	107.9	178	6.2	3.7	45.4	802	112	3	NA	546	NA	NA	sinus rhythm	normal	5	No
IGIB104020880	83	female	Maharashtra	no	Nasopharyngeal swab	1970-01-01	fever	102	97	METHYLPREDNISOLONE, Low molecular weight heparin, Hydroxychloroquine, FABIFLU, REMDESIVIR, IVERMECTIN, ANTIBIOTICS, VITAMIN C, ZINC, VITAMIN D, VITAMIN A	yes	Diabetes mellitus,Hypertension,Ischemic Heart Disease,HYPOTHYROIDISM	NA	Yes	NA	NA	24	24.6	yes	no	1	Basal crepitations	12.3	16800	78000	283	76.8	1.2	156	3.8	123	0.7	0.3	25.8	18.7	7	3.4	53.7	430	117.7	10	0.08	9867.04	8.9	NA	sinus rhythm	normal	5	No
IGIB104020900	88	female	Maharashtra	no	Nasopharyngeal swab	1970-01-01	fever, cough,breathlessness	98.7	99	METHYLPREDNISOLONE, Low molecular weight heparin, Hydroxychloroquine, FABIFLU, REMDESIVIR, IVERMECTIN, ANTIBIOTICS, VITAMIN C, ZINC, VITAMIN D, VITAMIN A	no	Diabetes mellitus,Hypertension	NA	Yes	NA	NA	28	18.7	yes	Non-invasive ventilation	1	Basal crepitations	10.6	24700	280000	204	42.1	0.9	139	4.4	111	0.8	0.2	43.6	34.9	5.8	2.9	69.3	592.3	113.8	3	NA	864.18	NA	NA	sinus rhythm	normal	6	No
IGIB104020901	52	male	Maharashtra	no	Nasopharyngeal swab	1970-01-01	cough & breathlessness	96.2	98	METHYLPREDNISOLONE, Low molecular weight heparin, Hydroxychloroquine, FABIFLU, REMDESIVIR, IVERMECTIN, ANTIBIOTICS, VITAMIN C, ZINC, VITAMIN D, VITAMIN A	yes	Diabetes mellitus	NA	Yes	NA	NA	20	23.4	yes	no	0	Basal crepitations	13.6	7900	374000	309	29.9	0.9	134	5.3	101	0.8	0.3	43.4	29.7	5.7	3.4	107	730	164.7	18	NA	NA	NA	NA	T wave inversion in V2-5	normal	5	No
IGIB104020918	60	male	Maharashtra	no	Nasopharyngeal swab	1970-01-01	cough & breathlessness	97	100	METHYLPREDNISOLONE, Low molecular weight heparin, Hydroxychloroquine, FABIFLU, REMDESIVIR, IVERMECTIN, ANTIBIOTICS, VITAMIN C, ZINC, VITAMIN D, VITAMIN A	yes	Hypertension	NA	Yes	NA	NA	28	20.4	yes	Non-invasive ventilation	1	Basal crepitations	9.7	9700	283000	92	38.2	1	138	5.2	105	0.4	0.2	38.3	19.3	6.2	3.3	39	NA	161.8	10	NA	1465.64	147.2	NA	sinus rhythm	normal	5	No
IGIB104020919	40	male	Maharashtra	no	Nasopharyngeal swab	1970-01-01	fever, cough,breathlessness	97.6	98	METHYLPREDNISOLONE, Low molecular weight heparin, Hydroxychloroquine, FABIFLU, REMDESIVIR, IVERMECTIN, ANTIBIOTICS, VITAMIN C, ZINC, VITAMIN D, VITAMIN A	no	no	3	Yes	NA	NA	26	20.1	no	Intubation	1	Basal crepitations	13.8	5900	73000	104	29.1	1.2	134	4.3	110	1.1	0.5	161.9	68.2	5.8	3.5	84.4	2336.8	159.4	6	NA	100	NA	NA	sinus tachycardia	normal	6	No
IGIB104020927	75	female	Maharashtra	no	Nasopharyngeal swab	1970-01-01	fever, cough,breathlessness	98.6	99	METHYLPREDNISOLONE, Low molecular weight heparin, Hydroxychloroquine, FABIFLU, REMDESIVIR, IVERMECTIN, ANTIBIOTICS, VITAMIN C, ZINC, VITAMIN D, VITAMIN A	yes	Hypertension	4	Yes	NA	NA	32	21	no	Intubation	1	Basal crepitations	13.1	17800	514000	126	80.2	1.7	131	3.6	97	0.9	0.5	28.5	18.8	6.3	3	139.5	986	12	8	NA	200	NA	NA	sinus rhythm	normal	NA	No
IGIB104020928	82	female	Maharashtra	no	Nasopharyngeal swab	1970-01-01	breathlessness & myalgia	97.4	98	METHYLPREDNISOLONE, Low molecular weight heparin, Hydroxychloroquine, FABIFLU, IVERMECTIN, ANTIBIOTICS, VITAMIN C, ZINC, VITAMIN D, VITAMIN A	yes	Chronic kidney disease,Ischemic Heart Disease,Diabetes mellitus	5	Yes	NA	NA	28	22.3	no	Intubation	1	Basal crepitations	10.3	11000	171000	234	165.5	12.5	138	6.5	88	0.5	0.2	107.9	178	6.6	3.8	146.4	780	49.9	26	NA	235	NA	NA	T wave inversion in V3-5	normal	5	No
IGIB104020929	83	male	Maharashtra	no	Nasopharyngeal swab	1970-01-01	cough & breathlessness	98.4	97	METHYLPREDNISOLONE, Low molecular weight heparin, Hydroxychloroquine, FABIFLU, REMDESIVIR, IVERMECTIN, ANTIBIOTICS, VITAMIN C, ZINC, VITAMIN D, VITAMIN A	no	Ischemic Heart Disease,Diabetes mellitus,Hypertension	4	Yes	NA	NA	26	22.6	no	Intubation	1	Basal crepitations	15.3	21900	126000	117	46.7	1.5	143	4.5	98	0.6	0.2	38.6	26.4	5.6	3.2	45.4	848	75.24	25	NA	1400	NA	NA	II, III aVF T wave inversions	normal	5	No
IGIB104020950	53	male	Maharashtra	no	Nasopharyngeal swab	1970-01-01	fever, cough,breathlessness	98.9	96	METHYLPREDNISOLONE, Low molecular weight heparin, Hydroxychloroquine, FABIFLU, REMDESIVIR, IVERMECTIN, ANTIBIOTICS, VITAMIN C, ZINC, VITAMIN D, VITAMIN A	yes	Diabetes mellitus,Hypertension	19	Yes	NA	NA	28	27.2	no	Non-invasive ventilation	1	Basal crepitations	18.2	6700	101000	200	54.1	0.9	136	2.9	97	1.4	0.5	43.8	38.8	6.2	3.7	73.3	1452	127.6	14	NA	410	NA	NA	sinus rhythm	normal	5	No
IGIB104020965	33	male	Maharashtra	no	Nasopharyngeal swab	1970-01-01	fever, cough,breathlessness	99.3	98	METHYLPREDNISOLONE, Low molecular weight heparin, Hydroxychloroquine, FABIFLU, REMDESIVIR, IVERMECTIN, ANTIBIOTICS, VITAMIN C, ZINC, VITAMIN D, VITAMIN A	yes	Diabetes mellitus	5	Yes	NA	DEATH	28	26	no	Non-invasive ventilation	1	Basal crepitations	13.9	6800	156000	151	59.6	1.9	141	4.2	106	0.5	0.2	80.6	42.6	6.6	3.8	57.4	483	138.15	6	NA	1120	37.9	NA	sinus tachycardia	normal	5	No
IGIB1040209667	70	male	Maharashtra	no	Nasopharyngeal swab	1970-01-01	fever, breathlessness	98.3	99	METHYLPREDNISOLONE, Low molecular weight heparin, Hydroxychloroquine, FABIFLU, REMDESIVIR, IVERMECTIN, ANTIBIOTICS, VITAMIN C, ZINC, VITAMIN D, VITAMIN A	no	Asthma	18	Yes	NA	DEATH	20	21.4	High-Flow Nasal Oxygen, Non Re-Breather Mask	Non-invasive ventilation, Intubated	0	Basal crepitations	14.9	8900	1820000	189	25.2	1.1	137	4.2	106	1.8	0.6	77	27.9	5.9	3.3	60.1	3250	143	8	0.54	1078	735.6	NA	sinus rhythm	normal	5	No
IGIB1040209759	65	female	Maharashtra	no	Nasopharyngeal swab	1970-01-01	breathlessness and cough	98.9	97	METHYLPREDNISOLONE, Low molecular weight heparin, Hydroxychloroquine, FABIFLU, REMDESIVIR, IVERMECTIN, ANTIBIOTICS, VITAMIN C, ZINC, VITAMIN D, VITAMIN A	no	Diabetes mellitus,Hypertension	7	Yes	NA	DEATH	32	22.4	no	Non-invasive ventilation	1	Basal crepitations	11.2	12000	124000	210	43.2	1.3	132	3.8	110	1.2	0.6	56.2	43.2	5.6	3.4	216	324	124	6	NA	1224	NA	NA	sinus rhythm	normal	6	No
IGIB1040209766	75	male	Maharashtra	no	Nasopharyngeal swab	1970-01-01	fever, breathlessness	99	95	METHYLPREDNISOLONE, Low molecular weight heparin, Hydroxychloroquine, FABIFLU, REMDESIVIR, IVERMECTIN, ANTIBIOTICS, VITAMIN C, ZINC, VITAMIN D, VITAMIN A	no	Hypertension	2	Yes	NA	DEATH	28	26.2	no	Non-invasive ventilation, Intubated	1	Basal crepitations	15.3	5500	191000	149	54.6	1.5	127	6.7	93	0.6	0.3	474.2	157.9	6.6	3.3	320.9	NA	163.15	NA	NA	200	NA	NA	sinus rhythm	normal	NA	No
IGIB1040246	8	male	Maharashtra	yes	Nosal Swab	1970-01-01	Influenza Like Illness	NA	NA	NA	NA	none	4	NA	NA	NA	NA	NA	NA	NA	NA	NA	NA	NA	NA	NA	NA	NA	NA	NA	NA	NA	NA	NA	NA	NA	NA	NA	NA	NA	NA	NA	NA	NA	NA	NA	NA	NA	NA
IGIB1040262	21	male	Maharashtra	no	Nosal Swab	1970-01-01	NA	NA	NA	NA	NA	none	NA	NA	NA	NA	NA	NA	NA	NA	NA	NA	NA	NA	NA	NA	NA	NA	NA	NA	NA	NA	NA	NA	NA	NA	NA	NA	NA	NA	NA	NA	NA	NA	NA	NA	NA	NA	NA
IGIB1040265	19	male	Maharashtra	yes	Nosal Swab	1970-01-01	None	NA	NA	NA	NA	none	2	NA	NA	NA	NA	NA	NA	NA	NA	NA	NA	NA	NA	NA	NA	NA	NA	NA	NA	NA	NA	NA	NA	NA	NA	NA	NA	NA	NA	NA	NA	NA	NA	NA	NA	NA	NA
IGIB1040325	37	male	Maharashtra	yes	Nosal Swab	1970-01-01	None	NA	NA	NA	NA	none	8	NA	NA	NA	NA	NA	NA	NA	NA	NA	NA	NA	NA	NA	NA	NA	NA	NA	NA	NA	NA	NA	NA	NA	NA	NA	NA	NA	NA	NA	NA	NA	NA	NA	NA	NA	NA
IGIB1040327	35	male	Maharashtra	no	Nosal Swab	1970-01-01	NA	NA	NA	CPR	NA	none	0	none	NA	dead	NA	NA	NA	NA	NA	NA	NA	NA	NA	NA	NA	NA	NA	NA	NA	NA	NA	NA	NA	NA	NA	NA	NA	NA	NA	NA	NA	NA	NA	NA	NA	NA	NA
IGIB1040460	31	male	Maharashtra	no	Nosal Swab	1970-01-01	None	NA	NA	NA	NA	none	8	NA	NA	NA	NA	NA	NA	NA	NA	NA	NA	NA	NA	NA	NA	NA	NA	NA	NA	NA	NA	NA	NA	NA	NA	NA	NA	NA	NA	NA	NA	NA	NA	NA	NA	NA	NA
IGIB1040564	36	male	Maharashtra	yes	Nosal Swab	1970-01-01	Influenza Like Illness	NA	NA	NA	NA	none	3	NA	NA	NA	NA	NA	NA	NA	NA	NA	NA	NA	NA	NA	NA	NA	NA	NA	NA	NA	NA	NA	NA	NA	NA	NA	NA	NA	NA	NA	NA	NA	NA	NA	NA	NA	NA
IGIB1040630	30	female	Maharashtra	yes	Nosal Swab	1970-01-01	None	NA	NA	NA	NA	none	6	NA	NA	NA	NA	NA	NA	NA	NA	NA	NA	NA	NA	NA	NA	NA	NA	NA	NA	NA	NA	NA	NA	NA	NA	NA	NA	NA	NA	NA	NA	NA	NA	NA	NA	NA	NA
IGIB1040639	65	female	Maharashtra	yes	Nosal Swab	1970-01-01	Influenza Like Illness, Headache, Bodyache	NA	NA	NA	NA	hypertension, diabetes mellitus	2	NA	NA	NA	NA	NA	NA	NA	NA	NA	NA	NA	NA	NA	NA	NA	NA	NA	NA	NA	NA	NA	NA	NA	NA	NA	NA	NA	NA	NA	NA	NA	NA	NA	NA	NA	NA
IGIB1040640	34	male	Maharashtra	no	Nosal Swab	1970-01-01	Cold	NA	NA	NA	NA	none	NA	NA	NA	NA	NA	NA	NA	NA	NA	NA	NA	NA	NA	NA	NA	NA	NA	NA	NA	NA	NA	NA	NA	NA	NA	NA	NA	NA	NA	NA	NA	NA	NA	NA	NA	NA	NA
IGIB1040668	34	female	Maharashtra	yes	Nosal Swab	1970-01-01	None	NA	NA	NA	NA	none	4	NA	NA	NA	NA	NA	NA	NA	NA	NA	NA	NA	NA	NA	NA	NA	NA	NA	NA	NA	NA	NA	NA	NA	NA	NA	NA	NA	NA	NA	NA	NA	NA	NA	NA	NA	NA
IGIB1040880	30	male	Maharashtra	yes	Nosal Swab	1970-01-01	Cough, Fever	NA	NA	NA	NA	none	7	NA	NA	NA	NA	NA	NA	NA	NA	NA	NA	NA	NA	NA	NA	NA	NA	NA	NA	NA	NA	NA	NA	NA	NA	NA	NA	NA	NA	NA	NA	NA	NA	NA	NA	NA	NA
IGIB1040900	16	male	Maharashtra	no	Nosal Swab	1970-01-01	NA	NA	NA	NA	NA	none	NA	NA	NA	NA	NA	NA	NA	NA	NA	NA	NA	NA	NA	NA	NA	NA	NA	NA	NA	NA	NA	NA	NA	NA	NA	NA	NA	NA	NA	NA	NA	NA	NA	NA	NA	NA	NA
IGIB1040901	75	male	Maharashtra	no	Nosal Swab	1970-01-01	NA	NA	NA	NA	NA	none	NA	NA	NA	NA	NA	NA	NA	NA	NA	NA	NA	NA	NA	NA	NA	NA	NA	NA	NA	NA	NA	NA	NA	NA	NA	NA	NA	NA	NA	NA	NA	NA	NA	NA	NA	NA	NA
IGIB1040918	35	male	Maharashtra	no	Nosal Swab	1970-01-01	NA	NA	NA	NA	NA	none	NA	NA	NA	NA	NA	NA	NA	NA	NA	NA	NA	NA	NA	NA	NA	NA	NA	NA	NA	NA	NA	NA	NA	NA	NA	NA	NA	NA	NA	NA	NA	NA	NA	NA	NA	NA	NA
IGIB1040919	50	male	Maharashtra	no	Nosal Swab	1970-01-01	NA	NA	NA	NA	NA	none	NA	NA	NA	NA	NA	NA	NA	NA	NA	NA	NA	NA	NA	NA	NA	NA	NA	NA	NA	NA	NA	NA	NA	NA	NA	NA	NA	NA	NA	NA	NA	NA	NA	NA	NA	NA	NA
IGIB1040927	33	female	Maharashtra	no	Nosal Swab	1970-01-01	NA	NA	NA	NA	NA	none	NA	NA	NA	NA	NA	NA	NA	NA	NA	NA	NA	NA	NA	NA	NA	NA	NA	NA	NA	NA	NA	NA	NA	NA	NA	NA	NA	NA	NA	NA	NA	NA	NA	NA	NA	NA	NA
IGIB1040928	37	male	Maharashtra	yes	Nosal Swab	1970-01-01	Cough, Bodyache	NA	NA	NA	NA	none	20	NA	NA	NA	NA	NA	NA	NA	NA	NA	NA	NA	NA	NA	NA	NA	NA	NA	NA	NA	NA	NA	NA	NA	NA	NA	NA	NA	NA	NA	NA	NA	NA	NA	NA	NA	NA
IGIB1040929	19	female	Maharashtra	no	Nosal Swab	1970-01-01	NA	NA	NA	NA	NA	none	NA	NA	NA	NA	NA	NA	NA	NA	NA	NA	NA	NA	NA	NA	NA	NA	NA	NA	NA	NA	NA	NA	NA	NA	NA	NA	NA	NA	NA	NA	NA	NA	NA	NA	NA	NA	NA
IGIB1040950	40	male	Maharashtra	no	Nosal Swab	1970-01-01	Fever, Sore Throat	NA	NA	NA	NA	none	4	NA	NA	NA	NA	NA	NA	NA	NA	NA	NA	NA	NA	NA	NA	NA	NA	NA	NA	NA	NA	NA	NA	NA	NA	NA	NA	NA	NA	NA	NA	NA	NA	NA	NA	NA	NA
IGIB1040965	41	female	Maharashtra	yes	Nosal Swab	1970-01-01	Sore Throat	NA	NA	NA	NA	none	10	NA	NA	NA	NA	NA	NA	NA	NA	NA	NA	NA	NA	NA	NA	NA	NA	NA	NA	NA	NA	NA	NA	NA	NA	NA	NA	NA	NA	NA	NA	NA	NA	NA	NA	NA	NA
IGIB10401013	6	female	Maharashtra	no	Nosal Swab	1970-01-01	NA	NA	NA	NA	NA	none	NA	NA	NA	NA	NA	NA	NA	NA	NA	NA	NA	NA	NA	NA	NA	NA	NA	NA	NA	NA	NA	NA	NA	NA	NA	NA	NA	NA	NA	NA	NA	NA	NA	NA	NA	NA	NA
IGIB10401014	23	male	Maharashtra	no	Nosal Swab	1970-01-01	NA	NA	NA	NA	NA	none	NA	NA	NA	NA	NA	NA	NA	NA	NA	NA	NA	NA	NA	NA	NA	NA	NA	NA	NA	NA	NA	NA	NA	NA	NA	NA	NA	NA	NA	NA	NA	NA	NA	NA	NA	NA	NA
IGIB10401015	31	male	Maharashtra	no	Nosal Swab	1970-01-01	NA	NA	NA	NA	NA	none	NA	NA	NA	NA	NA	NA	NA	NA	NA	NA	NA	NA	NA	NA	NA	NA	NA	NA	NA	NA	NA	NA	NA	NA	NA	NA	NA	NA	NA	NA	NA	NA	NA	NA	NA	NA	NA
IGIB10401016	30	female	Maharashtra	no	Nosal Swab	1970-01-01	None	NA	NA	NA	NA	none	2	NA	NA	NA	NA	NA	NA	NA	NA	NA	NA	NA	NA	NA	NA	NA	NA	NA	NA	NA	NA	NA	NA	NA	NA	NA	NA	NA	NA	NA	NA	NA	NA	NA	NA	NA	NA
IGIB10401060	25	male	Maharashtra	no	Nosal Swab	1970-01-01	NA	NA	NA	NA	NA	none	NA	NA	NA	NA	NA	NA	NA	NA	NA	NA	NA	NA	NA	NA	NA	NA	NA	NA	NA	NA	NA	NA	NA	NA	NA	NA	NA	NA	NA	NA	NA	NA	NA	NA	NA	NA	NA
IGIB10401066	10	female	Maharashtra	no	Nosal Swab	1970-01-01	None	NA	NA	NA	NA	none	2	NA	NA	NA	NA	NA	NA	NA	NA	NA	NA	NA	NA	NA	NA	NA	NA	NA	NA	NA	NA	NA	NA	NA	NA	NA	NA	NA	NA	NA	NA	NA	NA	NA	NA	NA	NA
IGIB10401103	24	male	Maharashtra	no	Nosal Swab	1970-01-01	NA	NA	NA	NA	NA	none	NA	NA	NA	NA	NA	NA	NA	NA	NA	NA	NA	NA	NA	NA	NA	NA	NA	NA	NA	NA	NA	NA	NA	NA	NA	NA	NA	NA	NA	NA	NA	NA	NA	NA	NA	NA	NA
IGIB10401138	7	male	Maharashtra	no	Nosal Swab	1970-01-01	NA	NA	NA	NA	NA	none	NA	NA	NA	NA	NA	NA	NA	NA	NA	NA	NA	NA	NA	NA	NA	NA	NA	NA	NA	NA	NA	NA	NA	NA	NA	NA	NA	NA	NA	NA	NA	NA	NA	NA	NA	NA	NA
IGIB10401144	26	male	Maharashtra	no	Nosal Swab	1970-01-01	NA	NA	NA	NA	NA	none	NA	NA	NA	NA	NA	NA	NA	NA	NA	NA	NA	NA	NA	NA	NA	NA	NA	NA	NA	NA	NA	NA	NA	NA	NA	NA	NA	NA	NA	NA	NA	NA	NA	NA	NA	NA	NA
IGIB10401160	32	male	Maharashtra	no	Nosal Swab	1970-01-01	NA	NA	NA	NA	NA	none	NA	NA	NA	NA	NA	NA	NA	NA	NA	NA	NA	NA	NA	NA	NA	NA	NA	NA	NA	NA	NA	NA	NA	NA	NA	NA	NA	NA	NA	NA	NA	NA	NA	NA	NA	NA	NA
IGIB10401214	35	female	Maharashtra	yes	Nosal Swab	1970-01-01	NA	NA	NA	NA	NA	none	14	NA	NA	NA	NA	NA	NA	NA	NA	NA	NA	NA	NA	NA	NA	NA	NA	NA	NA	NA	NA	NA	NA	NA	NA	NA	NA	NA	NA	NA	NA	NA	NA	NA	NA	NA	NA
IGIB10401215	19	male	Maharashtra	yes	Nosal Swab	1970-01-01	NA	NA	NA	NA	NA	none	14	NA	NA	NA	NA	NA	NA	NA	NA	NA	NA	NA	NA	NA	NA	NA	NA	NA	NA	NA	NA	NA	NA	NA	NA	NA	NA	NA	NA	NA	NA	NA	NA	NA	NA	NA	NA
IGIB10401216	15	female	Maharashtra	yes	Nosal Swab	1970-01-01	NA	NA	NA	NA	NA	none	14	NA	NA	NA	NA	NA	NA	NA	NA	NA	NA	NA	NA	NA	NA	NA	NA	NA	NA	NA	NA	NA	NA	NA	NA	NA	NA	NA	NA	NA	NA	NA	NA	NA	NA	NA	NA
IGIB10401249	22	male	Maharashtra	no	Nosal Swab	1970-01-01	NA	NA	NA	NA	NA	none	NA	NA	NA	NA	NA	NA	NA	NA	NA	NA	NA	NA	NA	NA	NA	NA	NA	NA	NA	NA	NA	NA	NA	NA	NA	NA	NA	NA	NA	NA	NA	NA	NA	NA	NA	NA	NA
IGIB10401251	56	male	Maharashtra	yes	Nosal Swab	1970-01-01	None	NA	NA	NA	NA	none	12	NA	NA	NA	NA	NA	NA	NA	NA	NA	NA	NA	NA	NA	NA	NA	NA	NA	NA	NA	NA	NA	NA	NA	NA	NA	NA	NA	NA	NA	NA	NA	NA	NA	NA	NA	NA
IGIB10401255	23	male	Maharashtra	no	Nosal Swab	1970-01-01	NA	NA	NA	NA	NA	none	NA	NA	NA	NA	NA	NA	NA	NA	NA	NA	NA	NA	NA	NA	NA	NA	NA	NA	NA	NA	NA	NA	NA	NA	NA	NA	NA	NA	NA	NA	NA	NA	NA	NA	NA	NA	NA
IGIB10401264	30	male	Maharashtra	yes	Nosal Swab	1970-01-01	None	NA	NA	NA	NA	none	10	NA	NA	NA	NA	NA	NA	NA	NA	NA	NA	NA	NA	NA	NA	NA	NA	NA	NA	NA	NA	NA	NA	NA	NA	NA	NA	NA	NA	NA	NA	NA	NA	NA	NA	NA	NA
IGIB10401273	35	female	Maharashtra	yes	Nosal Swab	1970-01-01	None	NA	NA	NA	NA	none	14	NA	NA	NA	NA	NA	NA	NA	NA	NA	NA	NA	NA	NA	NA	NA	NA	NA	NA	NA	NA	NA	NA	NA	NA	NA	NA	NA	NA	NA	NA	NA	NA	NA	NA	NA	NA
IGIB10401274	40	male	Maharashtra	yes	Nosal Swab	1970-01-01	None	NA	NA	NA	NA	none	14	NA	NA	NA	NA	NA	NA	NA	NA	NA	NA	NA	NA	NA	NA	NA	NA	NA	NA	NA	NA	NA	NA	NA	NA	NA	NA	NA	NA	NA	NA	NA	NA	NA	NA	NA	NA
IGIB10401275	4	male	Maharashtra	yes	Nosal Swab	1970-01-01	None	NA	NA	NA	NA	none	14	NA	NA	NA	NA	NA	NA	NA	NA	NA	NA	NA	NA	NA	NA	NA	NA	NA	NA	NA	NA	NA	NA	NA	NA	NA	NA	NA	NA	NA	NA	NA	NA	NA	NA	NA	NA
IGIB10401280	41	female	Maharashtra	no	Nosal Swab	1970-01-01	None	NA	NA	NA	NA	none	8	NA	NA	NA	NA	NA	NA	NA	NA	NA	NA	NA	NA	NA	NA	NA	NA	NA	NA	NA	NA	NA	NA	NA	NA	NA	NA	NA	NA	NA	NA	NA	NA	NA	NA	NA	NA
IGIB10401358	20	male	Maharashtra	yes	Nosal Swab	1970-01-01	None	NA	NA	NA	NA	none	10	NA	NA	NA	NA	NA	NA	NA	NA	NA	NA	NA	NA	NA	NA	NA	NA	NA	NA	NA	NA	NA	NA	NA	NA	NA	NA	NA	NA	NA	NA	NA	NA	NA	NA	NA	NA
IGIB10401426	2	male	Maharashtra	no	Nosal Swab	1970-01-01	NA	NA	NA	NA	NA	none	NA	NA	NA	NA	NA	NA	NA	NA	NA	NA	NA	NA	NA	NA	NA	NA	NA	NA	NA	NA	NA	NA	NA	NA	NA	NA	NA	NA	NA	NA	NA	NA	NA	NA	NA	NA	NA
IGIB10401433	7	female	Maharashtra	no	Nosal Swab	1970-01-01	NA	NA	NA	NA	NA	none	NA	NA	NA	NA	NA	NA	NA	NA	NA	NA	NA	NA	NA	NA	NA	NA	NA	NA	NA	NA	NA	NA	NA	NA	NA	NA	NA	NA	NA	NA	NA	NA	NA	NA	NA	NA	NA
IGIB10401554	4	male	Maharashtra	no	Nosal Swab	1970-01-01	NA	NA	NA	NA	NA	none	NA	NA	NA	NA	NA	NA	NA	NA	NA	NA	NA	NA	NA	NA	NA	NA	NA	NA	NA	NA	NA	NA	NA	NA	NA	NA	NA	NA	NA	NA	NA	NA	NA	NA	NA	NA	NA
IGIB10401555	7	female	Maharashtra	no	Nosal Swab	1970-01-01	NA	NA	NA	NA	NA	none	NA	NA	NA	NA	NA	NA	NA	NA	NA	NA	NA	NA	NA	NA	NA	NA	NA	NA	NA	NA	NA	NA	NA	NA	NA	NA	NA	NA	NA	NA	NA	NA	NA	NA	NA	NA	NA
IGIB10401556	32	male	Maharashtra	no	Nosal Swab	1970-01-01	NA	NA	NA	NA	NA	none	NA	NA	NA	NA	NA	NA	NA	NA	NA	NA	NA	NA	NA	NA	NA	NA	NA	NA	NA	NA	NA	NA	NA	NA	NA	NA	NA	NA	NA	NA	NA	NA	NA	NA	NA	NA	NA
IGIB10401746	27	male	Maharashtra	yes	Nosal Swab	1970-01-01	Sore Throat	NA	NA	NA	NA	none	10	NA	NA	NA	NA	NA	NA	NA	NA	NA	NA	NA	NA	NA	NA	NA	NA	NA	NA	NA	NA	NA	NA	NA	NA	NA	NA	NA	NA	NA	NA	NA	NA	NA	NA	NA	NA
IGIB10401829	43	male	Maharashtra	yes	Nosal Swab	16/05/2020	None	NA	NA	NA	NA	none	NA	NA	NA	NA	NA	NA	NA	NA	NA	NA	NA	NA	NA	NA	NA	NA	NA	NA	NA	NA	NA	NA	NA	NA	NA	NA	NA	NA	NA	NA	NA	NA	NA	NA	NA	NA	NA
IGIB10401877	35	female	Maharashtra	yes	Nosal Swab	17/05/2020	None	NA	NA	NA	NA	none	4	NA	NA	NA	NA	NA	NA	NA	NA	NA	NA	NA	NA	NA	NA	NA	NA	NA	NA	NA	NA	NA	NA	NA	NA	NA	NA	NA	NA	NA	NA	NA	NA	NA	NA	NA	NA
IGIB10401878	13	female	Maharashtra	yes	Nosal Swab	17/05/2020	None	NA	NA	NA	NA	none	4	NA	NA	NA	NA	NA	NA	NA	NA	NA	NA	NA	NA	NA	NA	NA	NA	NA	NA	NA	NA	NA	NA	NA	NA	NA	NA	NA	NA	NA	NA	NA	NA	NA	NA	NA	NA
IGIB10401879	18	male	Maharashtra	yes	Nosal Swab	17/05/2020	None	NA	NA	NA	NA	none	4	NA	NA	NA	NA	NA	NA	NA	NA	NA	NA	NA	NA	NA	NA	NA	NA	NA	NA	NA	NA	NA	NA	NA	NA	NA	NA	NA	NA	NA	NA	NA	NA	NA	NA	NA	NA
IGIB10401880	43	male	Maharashtra	yes	Nosal Swab	17/05/2020	None	NA	NA	NA	NA	none	4	NA	NA	NA	NA	NA	NA	NA	NA	NA	NA	NA	NA	NA	NA	NA	NA	NA	NA	NA	NA	NA	NA	NA	NA	NA	NA	NA	NA	NA	NA	NA	NA	NA	NA	NA	NA
IGIB10401891	45	female	Maharashtra	no	Nosal Swab	16/05/2020	None	NA	NA	NA	NA	none	14	NA	NA	NA	NA	NA	NA	NA	NA	NA	NA	NA	NA	NA	NA	NA	NA	NA	NA	NA	NA	NA	NA	NA	NA	NA	NA	NA	NA	NA	NA	NA	NA	NA	NA	NA	NA
IGIB10401945	20	male	Maharashtra	no	Nosal Swab	1970-01-01	NA	NA	NA	NA	NA	none	NA	NA	NA	NA	NA	NA	NA	NA	NA	NA	NA	NA	NA	NA	NA	NA	NA	NA	NA	NA	NA	NA	NA	NA	NA	NA	NA	NA	NA	NA	NA	NA	NA	NA	NA	NA	NA
IGIB10402044	26	male	Maharashtra	no	Nosal Swab	17/04/2020	NA	NA	NA	NA	NA	none	NA	NA	NA	NA	NA	NA	NA	NA	NA	NA	NA	NA	NA	NA	NA	NA	NA	NA	NA	NA	NA	NA	NA	NA	NA	NA	NA	NA	NA	NA	NA	NA	NA	NA	NA	NA	NA
IGIB10402045	27	male	Maharashtra	no	Nosal Swab	17/04/2020	NA	NA	NA	NA	NA	none	NA	NA	NA	NA	NA	NA	NA	NA	NA	NA	NA	NA	NA	NA	NA	NA	NA	NA	NA	NA	NA	NA	NA	NA	NA	NA	NA	NA	NA	NA	NA	NA	NA	NA	NA	NA	NA
IGIB10402137	32	male	Maharashtra	no	Nosal Swab	17/04/2020	NA	NA	NA	NA	NA	none	NA	NA	NA	NA	NA	NA	NA	NA	NA	NA	NA	NA	NA	NA	NA	NA	NA	NA	NA	NA	NA	NA	NA	NA	NA	NA	NA	NA	NA	NA	NA	NA	NA	NA	NA	NA	NA
IGIB10402138	12	female	Maharashtra	no	Nosal Swab	17/04/2020	NA	NA	NA	NA	NA	none	NA	NA	NA	NA	NA	NA	NA	NA	NA	NA	NA	NA	NA	NA	NA	NA	NA	NA	NA	NA	NA	NA	NA	NA	NA	NA	NA	NA	NA	NA	NA	NA	NA	NA	NA	NA	NA
IGIB10402139	15	female	Maharashtra	no	Nosal Swab	1970-01-01	None	NA	NA	NA	NA	none	10	NA	NA	NA	NA	NA	NA	NA	NA	NA	NA	NA	NA	NA	NA	NA	NA	NA	NA	NA	NA	NA	NA	NA	NA	NA	NA	NA	NA	NA	NA	NA	NA	NA	NA	NA	NA
IGIB10402229	50	male	Maharashtra	no	Nosal Swab	1970-01-01	NA	NA	NA	NA	NA	none	NA	NA	NA	NA	NA	NA	NA	NA	NA	NA	NA	NA	NA	NA	NA	NA	NA	NA	NA	NA	NA	NA	NA	NA	NA	NA	NA	NA	NA	NA	NA	NA	NA	NA	NA	NA	NA
IGIB10402411	29	male	Maharashtra	no	Nosal Swab	1970-01-01	None	NA	NA	NA	NA	none	9	NA	NA	NA	NA	NA	NA	NA	NA	NA	NA	NA	NA	NA	NA	NA	NA	NA	NA	NA	NA	NA	NA	NA	NA	NA	NA	NA	NA	NA	NA	NA	NA	NA	NA	NA	NA
IGIB10402487	36	female	Maharashtra	no	Nosal Swab	1970-01-01	NA	NA	NA	NA	NA	none	NA	NA	NA	NA	NA	NA	NA	NA	NA	NA	NA	NA	NA	NA	NA	NA	NA	NA	NA	NA	NA	NA	NA	NA	NA	NA	NA	NA	NA	NA	NA	NA	NA	NA	NA	NA	NA
IGIB10402719	30	male	Maharashtra	yes	Nosal Swab	1970-01-01	Influenza Like Illness	NA	NA	NA	NA	none	3	NA	NA	NA	NA	NA	NA	NA	NA	NA	NA	NA	NA	NA	NA	NA	NA	NA	NA	NA	NA	NA	NA	NA	NA	NA	NA	NA	NA	NA	NA	NA	NA	NA	NA	NA	NA
IGIB10402860	52	male	Maharashtra	yes	Nosal Swab	1970-01-01	Influenza Like Illness	NA	NA	NA	NA	none	2	NA	NA	NA	NA	NA	NA	NA	NA	NA	NA	NA	NA	NA	NA	NA	NA	NA	NA	NA	NA	NA	NA	NA	NA	NA	NA	NA	NA	NA	NA	NA	NA	NA	NA	NA	NA

## Sheet: Curated dataset
Patient ID	Age	Gender	BMI	Presence of Symptoms	Fever	Cough	Breathlessness	Travel History	Temp	SpO2	Contact to COVID Patient	Presence of Co-morbidity	Diabetes	Hypertension	Heart Condition	Respiratory rate (BPM)	Haemoglobin	TLC Count	Platelet count	Random Blood Sugar	Urea	Creatine	Sodium	Potassium	Chloride	Total Bilirubin	Direct Bilirubin	SGOT	SGPT	Total proteins	Albumin	Alkaline Phosphatase	C-Reactive Proteins	Outcome
IGIB1040201013	53	1	22.5	1	1	1	1	0	96.8	99	1	0	0	0	0	20	15.9	6200	127000	121	47.5	1.3	143	4.8	108	0.5	0.2	81.3	70	5.9	3.8	44.1	58.1	Mild
IGIB1040201014	26	0	25.7	0	0	0	0	0	98.7	98	1	0	0	0	0	16	13.4	4140	188000	96	21.8	1	148	4.1	108	0.3	0.1	22.2	14.8	6.6	3.9	58.5	3.66	Mild
IGIB1040201015	28	1	22.2	0	0	0	0	0	98.4	98	1	0	0	0	0	16	15.9	4680	231000	102	18.3	5800	159	18.1	1.1	0.8	0.3	19.3	12.8	7	4.2	86	10.17	Mild
IGIB1040201016	73	1	21.5	1	1	1	1	0	98	98	1	0	0	0	0	26	13.2	5200	234000	119	36.6	0.9	140	4.2	104	2.4	1.2	59	47.9	6.3	3.7	120	168.9	Severe
IGIB1040201060	49	1	27.4	1	1	1	0	0	101	98	1	1	0	0	0	20	13.7	9500	321000	92	22	0.9	124	3.8	92	4.2	2.1	44.6	55.5	5.9	3.1	177	164	Mild
IGIB1040201066	85	1	20.3	1	1	0	1	0	99.6	97	1	1	1	0	0	26	13.1	7400	287000	396	104.1	1.3	148	4	110	0.3	0.1	53.4	51.7	6.6	3.6	68	13.2	Mild
IGIB1040201103	45	1	23.4	1	1	1	1	0	99.3	98	1	0	0	0	0	24	10.8	19900	216000	112	48.9	1.2	144	5.8	112	2.7	1.7	42.4	60.5	5.7	3.3	98.2	124	Mild
IGIB1040201138	35	1	22.1	1	0	0	0	0	97.3	98	1	0	0	0	0	16	12.3	3800	201000	131	25.9	0.3	142	5.2	105	0.8	0.4	43.2	32.1	5.4	3.2	56.5	16.9	Mild
IGIB1040201144	65	0	24.6	1	0	1	1	0	98	99	0	1	1	0	0	20	10.5	8900	288000	332	125.9	1.5	145	4.6	112	0.5	0.2	32.7	30	6.2	4	45.6	34	Mild
IGIB1040201160	61	0	25.4	0	0	0	0	0	98.6	98	0	1	1	1	0	16	13.8	3500	134000	432	17.1	1.1	140	4.4	107	0.5	0.2	36.4	23.8	7.2	4	107.9	0.7	Mild
IGIB1040201214	56	1	23.5	0	0	0	0	0	97.6	98	1	1	1	1	0	15	12.5	4100	189000	198	18.6	1.1	139	4.2	103	0.3	0.1	34.5	26.9	6	3.5	45.3	0.5	Mild
IGIB1040201215	18	1	22.3	0	0	0	0	0	96.7	98	0	0	0	0	0	16	15.9	5200	210000	98	26	0.9	134	4	107	0.5	0.3	38.6	56.9	7	4.3	111	2.3	Mild
IGIB1040201216	76	0	21.5	1	0	0	1	0	98.4	97	0	1	1	0	0	20	13.2	2900	100000	316	17.6	0.8	144	4.1	108	0.3	0.1	20.2	16.1	6.2	3.5	92.5	0.5	Mild
IGIB1040201249	56	1	23	1	1	1	0	0	99.8	98	0	1	1	1	0	20	12.2	6500	362000	113	59.1	1.4	134	3.9	94	0.8	0.4	56.4	34.5	6.1	3.2	66.4	56.7	Mild
IGIB1040201255	82	0	22.4	1	0	1	1	0	98.1	98	1	1	1	1	1	30	10.3	12900	155000	401	152	7.9	138	3.8	108	0.5	0.5	0.2	3.8	6	4	146.4	134	Severe
IGIB1040201273	28	0	22.7	1	1	0	0	0	98.7	98	1	0	0	0	0	15	14.5	6200	265000	88	15.4	0.8	144	3.9	106	0.4	0.1	22.9	15.1	7.2	4.2	82.6	0.29	Mild
IGIB1040201274	24	0	22.3	1	1	0	0	0	100	99	1	0	0	0	0	14	12.3	9000	287000	75	21.5	0.8	143	4	110	0.4	0.1	23.4	14.6	6	3.2	43.5	0.5	Mild
IGIB1040201275	70	1	22.5	1	1	1	0	0	99.2	99	0	1	0	1	0	16	14.9	11700	123000	109	47.4	0.9	127	5.3	94	1.1	0.4	27.9	21.2	6.1	3.5	82.6	87.4	Severe
IGIB1040201280	47	1	23.6	1	1	1	0	0	98.6	98	0	0	0	0	0	20	13.8	7600	280000	122	39	0.9	144	5.3	106	0.4	0.2	41.4	21.1	3.6	6.6	54.2	16.8	Severe
IGIB1040201358	58	0	23	0	0	0	0	0	97.8	98	1	0	0	0	0	16	12.3	8700	342000	96	26.7	0.8	142	4.2	110	0.4	0.1	23.4	14.6	6	3.2	43.5	0.5	Mild
IGIB1040201426	33	0	22.1	0	0	0	0	0	96	98	1	0	0	0	0	18	13.6	6600	303000	105	18.8	0.7	155	3.9	125	0.7	0.2	38	28.8	6	3.4	49.2	0.24	Mild
IGIB1040201433	13	1	21.5	0	0	0	0	0	97.3	100	1	0	0	0	0	18	13.9	7700	355000	87	18.2	0.7	143	4.3	109	0.6	0.2	38.6	26.4	5.6	3.2	45.4	0.35	Mild
IGIB1040201554	62	1	21.6	0	0	0	0	0	97.1	99	0	0	0	0	0	17	16	11000	378000	205	24.6	0.8	134	4.6	111	0.6	0.4	32.4	28.7	5.8	3.4	45.3	15.56	Mild
IGIB1040201555	75	1	23.4	1	1	0	1	1	98.7	98	0	1	0	1	0	28	14	5900	199000	120	38.3	1.9	146	5.2	111	0.5	0.2	285	190	5.8	2.9	217	160.2	Severe
IGIB1040201556	41	1	24.5	1	1	0	0	0	102	98	0	0	0	0	0	18	12.1	4400	170000	87	26.3	1.4	142	4.1	107	0.4	0.2	22.9	21	6.6	3.8	84.7	98	Mild
IGIB1040201746	47	1	23.5	1	0	0	1	0	96.7	97	0	1	1	1	0	24	13.8	4000	125000	312	28.2	1.2	144	4.5	103	0.5	0.2	34.8	23.8	6.5	3.7	75.2	54.4	Mild
IGIB1040201829	75	0	21.1	1	0	0	1	0	98	98	1	1	1	0	0	26	7.7	10800	132000	332	37.1	0.8	137	5.2	104	3.3	2.2	124	82	4.8	2.6	185	64	Mild
IGIB1040201877	42	1	22.7	0	0	0	0	0	96.7	99	0	0	0	0	0	16	12.3	16800	78000	283	76.8	1.2	156	3.8	123	0.7	0.3	25.8	18.7	7	3.4	53.7	0.5	Mild
IGIB1040201878	46	1	23	0	0	0	0	0	96.6	100	0	1	0	1	0	18	10.3	11000	171000	234	165.5	12.5	138	6.5	88	0.5	0.2	107.9	178	6.6	3.8	146.4	0.5	Mild
IGIB1040201879	56	0	21.2	0	0	0	0	0	96.1	98	0	0	0	0	0	15	13.4	6500	432000	180	23.1	0.9	140	4	110	0.8	0.5	32	34.8	5.4	3.2	112	0.5	Mild
IGIB1040201880	42	0	22.3	0	0	0	0	0	98.3	99	0	0	0	0	0	18	15.9	4900	197000	93	32.9	1.1	143	4.4	108	0.5	0.2	28.6	44.5	6.5	4.1	73.3	0.5	Mild
IGIB1040201945	42	1	23.6	1	0	1	1	0	96.7	96	0	0	0	0	0	26	10.4	5400	217000	101	26.7	0.8	135	4.5	100	0.6	0.2	68.7	48.5	7.4	3.8	56.7	158.5	Severe
IGIB1040202044	54	1	25	1	1	1	0	0	97.8	99	0	1	1	1	1	22	15.6	15300	259000	246	44.2	0.9	143	5.4	104	0.9	0.3	19.1	28.9	6.9	3.5	46.7	149.17	Mild
IGIB1040202137	92	1	23.7	1	0	0	1	0	99.8	94	0	0	0	0	0	22	14.9	15100	470000	124	56.3	0.8	138	4.3	106	0.9	0.2	38.4	29.6	6	3.2	32.4	134.8	Severe
IGIB1040202139	70	0	22.6	1	0	1	1	0	97	100	0	1	1	1	0	24	12.1	10100	403000	281	37.8	1	133	4.9	103	0.3	0.1	32.1	27.4	5.9	3	84.5	77.6	Mild
IGIB1040202229	76	0	25.6	1	1	0	1	0	96.9	98	0	1	1	1	1	24	12.1	8900	150000	258	52.6	0.9	142	4.1	95	0.5	0.1	43.3	26	6.1	3.6	64.6	67.43	Mild
IGIB104020246	48	1	24	1	1	0	0	0	97.6	98	1	1	1	1	0	18	16	8700	243000	152	34	1.1	134	4.2	106	0.6	0.3	28.4	32.5	6.5	4	123	2.3	Mild
IGIB1040202487	48	1	25.7	1	1	0	0	0	98.7	99	1	1	0	0	1	18	15.2	4700	103000	82	18.6	1.2	140	3.4	103	0.7	0.3	27.6	23.7	7.6	3.9	58	3.65	Mild
IGIB104020262	54	0	24.2	1	1	1	1	0	99	99	0	1	1	0	0	24	13.4	6500	432000	180	23.1	0.9	140	4	110	0.8	0.5	32	34.8	5.4	3.2	112	0.5	Mild
IGIB104020265	71	1	18.9	1	0	1	1	0	98.4	97	0	1	0	1	0	34	12.8	12300	371000	157	164	3	150	7.1	122	0.4	0.2	41.5	57	6.7	3.6	68	167	Mild
IGIB1040202719	27	0	24.6	0	0	0	0	0	97.6	99	1	0	0	0	0	16	14.6	4900	210000	112	34.2	0.9	143	4.1	108	0.5	0.3	20.9	27.4	7	4	66.9	0.78	Mild
IGIB1040202860	26	0	21.6	1	1	0	0	0	100	99	1	0	0	0	0	16	11.2	4900	193000	96	16.4	0.7	140	4.4	109	0.4	0.1	0.4	17.2	12.6	6.5	3.8	3.04	Mild
IGIB104020325	74	1	20.8	1	0	1	1	0	98.2	98	1	1	1	0	0	30	14.5	5900	275000	232	52.3	0.9	136	4.9	106	0.7	0.2	38	28.8	6	3.4	49.2	166.3	Severe
IGIB104020327	67	1	23.2	1	0	1	1	0	97.6	97	0	1	0	1	0	22	13.1	17800	514000	126	80.2	1.7	131	3.6	97	1.2	0.8	43.2	23.4	5.8	3	65.7	145	Mild
IGIB1040203570	25	0	22.6	1	1	1	0	0	97.8	96	1	0	0	0	0	16	12.3	5800	226000	74	18.9	0.8	142	3.8	109	0.8	0.2	18.5	18.3	6.7	3.7	61.4	0.5	Mild
IGIB1040203762	38	1	23.8	1	1	1	0	0	96.8	98	0	0	0	0	0	18	14.2	7600	183000	84	24.7	1	145	3.6	110	0.5	0.3	31.6	31.2	6.5	3.6	64.1	24.43	Mild
IGIB1040203763	28	1	24.6	1	1	1	0	0	97.8	98	0	0	0	0	0	18	16.3	8100	195000	84	21	1.1	139	3.5	108	0.8	0.3	43.2	39	6.8	3.6	58.9	2.94	Mild
IGIB1040203854	38	0	23.4	1	1	0	0	0	98	96	1	0	0	0	0	16	10.1	5700	295000	101	15.7	0.7	142	3	111	0.4	0.1	23.8	18.8	5.6	3.2	55.6	2.45	Mild
IGIB1040204112	33	1	23.6	1	0	1	1	0	98.5	98	0	0	0	0	0	24	14.7	5500	130000	84	26.4	1.2	141	3.8	105	0.8	0.2	52.9	96.8	6.3	3.5	70.1	45.4	Mild
IGIB1040204114	45	1	24.7	1	0	1	1	0	96.4	96	0	0	0	0	0	24	0	5400	211000	98	26.4	0.9	144	4.5	108	0.6	0.3	96	143	6	3.3	100	33	Mild
IGIB1040204115	48	1	25.6	0	0	0	0	0	97.8	99	0	0	0	0	0	16	15.4	7200	183000	97	27.8	0.9	135	4.1	105	0.6	0.3	26.2	33.1	7.1	3.7	67.8	6.24	Mild
IGIB1040204198	38	0	22.4	0	0	0	0	0	96.8	98	0	0	0	0	0	14	10.1	5700	295000	101	32.4	0.8	142	3	111	0.4	0.2	23.1	18.8	5.6	3.2	55.6	0.26	Mild
IGIB1040204280	41	0	26.8	1	0	1	0	0	98.4	99	0	0	0	0	0	17	10.7	11500	148000	125	13.5	0.8	142	5.3	109	0.5	0.2	28	13.3	7.1	3.7	144.3	381	Mild
IGIB1040204315	53	1	24.5	1	1	1	1	0	97.8	97	0	1	1	1	0	20	12.5	5400	116000	219	36.3	1.7	135	4.5	101	0.6	0.3	38.4	45.5	6.8	3.7	47.8	42.45	Mild
IGIB1040204316	69	1	23.6	1	1	1	0	0	98.6	97	0	1	1	1	0	18	15.8	9800	180000	114	23.9	1	131	3.6	105	0.3	0.1	127	120	6.1	3.7	102	34.5	Mild
IGIB1040204596	18	0	22.8	0	0	0	0	0	97.8	98	1	0	0	0	0	16	10.3	3400	136000	76	14.1	0.8	144	5.1	109	0.6	0.2	27.3	20.2	6.8	3.4	78.9	0.56	Mild
IGIB1040204597	25	1	23.8	1	0	0	0	1	98.7	98	1	0	0	0	0	15	15.8	7100	287000	104	33.9	1	140	3.7	106	0.3	0.1	29.8	56.3	6.5	3.9	65.1	2.34	Mild
IGIB104020460	38	1	25.1	1	0	1	1	0	97.8	98	0	0	0	0	0	28	14.2	20300	328000	87	48.6	0.8	144	3.8	110	0.6	0.2	36.1	42.7	6.6	4.1	44.7	75.7	Severe
IGIB104020564	46	0	22.2	1	0	1	1	0	98.6	99	0	1	1	1	0	26	8.5	9800	419000	351	54.9	1.1	130	5.4	108	1.2	0.7	31.1	34.5	6	3.9	56.3	16.1	Mild
IGIB1040206218	23	1	25.4	1	1	1	0	0	96.7	97	0	0	0	0	0	18	15.8	9700	134000	120	19.9	1.1	144	4.4	109	0.9	0.4	25	22.9	6.6	3.9	62.5	24.67	Mild
IGIB1040206221	52	1	23.4	1	1	0	0	0	97	99	0	1	1	1	0	18	10.1	13400	92000	201	19.6	1	133	4.4	90	0.6	0.2	23.7	20.9	6.4	3.6	43.7	147	Mild
IGIB1040206222	40	0	25.6	1	1	0	1	0	102	97	0	1	1	0	0	22	14.4	4500	152000	107	23.4	0.9	143	5	110	1	0.4	34.6	30.9	5.7	3.1	76.8	13.4	Mild
IGIB1040206227	56	1	23.5	1	0	1	1	0	98.6	97	0	1	0	1	0	22	12.2	6500	362000	119	59.1	1.4	134	3.9	94	0.8	0.3	46.7	40.9	7.1	3.5	76.8	65.7	Mild
IGIB1040206234	58	0	22.7	1	0	1	1	0	95.7	96	0	1	0	1	1	26	13.1	2500	352000	130	20	0.8	146	4.5	110	0.3	0.1	19.8	18.1	7.6	3.7	97.4	25.8	Mild
IGIB1040206235	36	1	25.7	1	0	0	0	0	97.2	98	0	0	0	0	0	18	15.6	5100	221000	130	18.9	0.8	138	4.6	108	0.7	0.4	27.4	28.3	7.3	4.3	41.4	0.5	Mild
IGIB1040206240	18	1	22.2	1	1	0	0	0	97	97	1	0	0	0	0	16	14.2	7600	183000	84	24.7	1	145	3.6	110	0.5	0.3	31.6	31.2	6.5	3.6	64.1	2.34	Mild
IGIB1040206249	63	1	27.4	1	0	0	0	0	97.8	96	0	1	1	1	0	17	16.4	9100	322000	115	22.5	0.9	143	4.6	110	0.9	0.4	34.5	30.9	6.5	3.4	57.8	0.67	Mild
IGIB1040206253	48	1	25.6	1	0	1	1	0	96.6	97	0	1	0	1	0	22	16	7300	180000	91	21.6	0.9	144	3.8	108	0.6	0.2	33.6	48.9	6.5	4.2	45.4	6.8	Mild
IGIB1040206254	65	0	21.5	1	1	0	0	0	97.6	97	0	0	0	0	0	17	12.4	9400	112000	98	39.9	1	138	4.2	116	0.5	0.2	88.9	43.7	6.3	3.7	237	0.67	Mild
IGIB1040206255	40	1	20.3	1	1	1	0	0	96.1	99	0	0	0	0	0	18	13.9	3900	165000	86	23.3	1.3	140	3.9	106	1	0.3	36.7	32.7	6	3.8	60.6	0.24	Mild
IGIB1040206256	46	1	22.3	1	1	1	0	0	98	96	0	0	0	0	0	18	13.7	4200	147000	104	17	0.9	138	4.5	112	0.8	0.2	73.9	105.2	7.4	3.9	112	0.1	Mild
IGIB1040206257	60	1	22.1	1	0	1	1	0	96.5	96	0	1	1	0	0	22	14.6	5400	211000	98	26.4	0.9	144	4.5	108	0.6	0.3	96	143	6	3.3	87	33	Mild
IGIB1040206259	32	1	24.6	1	1	0	1	0	98.7	95	1	0	0	0	0	24	14.2	4700	111000	78	17.7	1	143	4.4	105	1	0.4	65.7	54	7	3.9	109	43.7	Mild
IGIB1040206260	32	0	25.4	1	1	0	0	0	99.1	97	1	0	0	0	0	17	16	11000	378000	205	24.6	0.8	134	4.6	111	0.6	0.4	32.4	28.7	5.8	3.4	45.3	15.56	Mild
IGIB104020630	56	0	24.4	1	0	1	0	0	97.2	98	0	1	1	0	0	24	12.3	14400	419000	303	91	1.7	141	5.2	108	0.8	0.3	18.2	15	7.3	3.5	66.1	8.5	Mild
IGIB1040206347	9	0	23.5	0	0	0	0	0	97.6	98	1	0	0	0	0	20	14	5900	199000	120	38.3	1.9	146	5.2	111	0.5	0.2	285	190	5.8	2.9	217	160.2	Mild
IGIB1040206356	48	1	24.6	1	1	1	1	0	96	97	0	1	0	1	1	24	15.5	5300	235000	134	26.2	0.9	141	3.8	103	0.8	0.4	24.3	20.5	6.5	4.2	75	102	Mild
IGIB1040206372	38	1	21.5	1	1	0	0	0	98.4	98	0	0	0	0	0	16	15.8	5700	174000	95	19	0.9	144	4.6	104	1.3	0.4	17.2	14.1	6.8	4.1	82.7	3.5	Mild
IGIB1040206373	14	1	23	0	0	0	0	0	96.7	99	1	0	0	0	0	20	13.4	5400	265000	94	15.6	0.9	139	4	106	0.8	0.3	16.7	11	7.2	4.1	134.9	0.5	Mild
IGIB1040206374	18	0	21.3	0	0	0	0	0	97.8	98	1	0	0	0	0	20	13.3	5300	236000	78	21.5	0.8	141	3.8	106	0.4	0.2	18.9	15.7	7	4.2	63.2	2.28	Mild
IGIB1040206381	44	0	23.8	1	1	0	0	0	98	97	0	1	1	0	0	18	13.9	7700	355000	87	18.2	0.7	143	4.3	109	0.6	0.2	38.6	26.4	5.6	3.2	45.4	0.35	Mild
IGIB1040206382	40	0	21.5	1	1	0	0	0	99.8	97	0	0	0	0	0	18	16	11000	378000	205	24.6	0.8	134	4.6	111	0.6	0.4	32.4	28.7	5.8	3.4	45.3	15.56	Mild
IGIB1040206384	41	0	22.4	1	0	1	1	0	101	98	0	1	1	1	0	26	9.8	4800	274000	326	46.7	1.2	140	5.1	105	0.7	0.3	65.8	57.9	6.5	3.1	78.4	25.8	Mild
IGIB104020639	58	1	22.3	1	1	0	1	0	100.1	100	0	0	0	0	0	26	14.3	14600	546000	102	76	1.3	140	3.6	110	0.9	0.4	45.8	38.9	7	3.6	136	0.5	Mild
IGIB104020640	56	0	22.4	1	0	1	1	0	99.1	99	0	1	1	0	0	28	14	18500	191000	92	26.7	1	140	5.1	106	0.4	0.1	58.7	45.5	5.5	3.1	84.8	101	Severe
IGIB1040206488	43	1	20.9	1	1	0	0	0	98.4	97	0	0	0	0	0	18	9.5	12400	379000	103	29.9	0.9	136	4.5	102	0.6	0.2	23.4	21.2	6.6	2.9	67.8	3.7	Mild
IGIB1040206489	53	1	22.7	1	0	0	1	0	97.8	96	0	1	1	0	0	26	15	9500	199000	173	22.6	0.8	137	3.8	102	0.5	0.2	17.3	18.3	6	3.5	148.1	34.3	Mild
IGIB1040206499	34	0	26.2	1	0	1	1	0	97	97	0	0	0	0	0	24	13.3	4400	214000	98	19.1	0.9	138	4.3	110	0.7	0.4	23.6	21.6	6.4	3.2	87.9	0.5	Mild
IGIB1040206500	65	0	22.3	1	1	1	0	0	96.9	96	0	1	1	1	0	22	9.7	8600	267000	332	61.8	1.6	142	5	109	0.9	0.5	43.5	34.5	6.8	3.1	64.7	7.28	Mild
IGIB1040206502	85	0	22.3	1	0	1	1	0	98.4	97	0	1	1	1	1	21	13.4	5400	265000	94	15.6	0.9	139	4	106	0.8	0.3	16.7	11	7.2	4.1	134.9	0.5	Mild
IGIB1040206504	65	1	20.9	1	1	1	0	0	101	98	0	1	1	1	0	18	10.1	5700	295000	101	32.4	0.8	142	3	111	0.4	0.2	23.1	18.8	6.8	3.1	78.9	3.24	Mild
IGIB1040206513	21	0	22.7	0	0	0	0	0	98.7	97	1	0	0	0	0	15	13.2	9700	184000	76	21	0.8	136	3.4	98	0.6	0.3	13.4	11.3	5	3.1	132.7	2.12	Mild
IGIB1040206522	29	0	26.2	1	0	0	0	0	98	96	0	0	0	0	0	16	11.5	4700	193000	114	21.1	0.8	145	5	106	0.5	0.3	25.7	15.1	7.3	4.4	55.1	0.5	Mild
IGIB1040206523	55	0	22.3	1	1	1	0	0	99.6	97	0	1	1	0	0	18	14.7	5500	130000	84	26.4	1.2	141	3.8	105	0.8	0.2	52.9	96.8	6.3	3.5	70.1	7.8	Mild
IGIB1040206531	15	1	20.8	0	0	0	0	0	99.3	98	1	0	0	0	0	17	13	5400	211000	98	26.4	0.9	144	4.5	108	0.6	0.3	96	143	6	3.3	100	2.4	Mild
IGIB1040206532	65	0	21.4	1	1	0	1	0	100	95	0	1	1	1	0	24	15.4	7200	183000	97	27.8	0.9	135	4.1	105	0.6	0.3	26.2	33.1	7.1	3.7	67.8	5.67	Mild
IGIB1040206533	34	0	22.5	1	1	0	0	0	97.3	96	0	0	0	0	0	20	10.1	5700	295000	101	32.4	0.8	142	3	111	0.4	0.2	23.1	18.8	5.6	3.2	55.6	3.2	Mild
IGIB1040206535	24	0	23.6	1	1	0	0	0	98	97	0	0	0	0	0	16	10.7	11500	148000	125	13.5	0.8	142	5.3	109	0.5	0.2	28	13.3	7.1	3.7	144.3	1.24	Mild
IGIB1040206577	40	1	23.2	1	0	0	0	0	98.6	98	0	0	0	0	0	17	12.5	5400	116000	219	36.3	1.7	135	4.5	101	0.6	0.3	38.4	45.5	6.8	3.7	47.8	3.45	Mild
IGIB1040206578	23	1	23	1	0	0	0	0	97.6	98	0	0	0	0	0	15	15.8	9800	180000	114	23.9	1	131	3.6	105	0.3	0.1	127	120	6.1	3.7	102	1.02	Mild
IGIB1040206579	28	1	22.1	1	1	1	0	0	98.7	98	1	0	0	0	0	16	10.3	3400	136000	76	14.1	0.8	144	5.1	109	0.6	0.2	27.3	20.2	6.8	3.4	78.9	2.67	Mild
IGIB1040206580	33	1	21.5	1	1	0	0	0	96.7	96	0	0	0	0	0	18	15.8	7100	287000	104	33.9	1	140	3.7	106	0.3	0.1	29.8	56.3	6.5	3.9	65.1	1.78	Mild
IGIB1040206581	22	0	21.6	1	1	0	0	0	98.4	97	0	0	0	0	0	17	15.8	9700	134000	120	19.9	1.1	144	4.4	109	0.9	0.4	25	22.9	6.6	3.9	62.5	2.67	Mild
IGIB1040206583	27	0	22.34	1	0	0	0	0	99.8	99	1	0	0	0	0	18	10.1	13400	92000	201	19.6	1	133	4.4	90	0.6	0.2	23.7	20.9	6.4	3.6	43.7	0.5	Mild
IGIB1040206584	65	0	24.5	1	1	1	1	0	100	95	0	1	1	0	1	24	14.4	4500	152000	107	23.4	0.9	143	5	110	1	0.4	34.6	30.9	5.7	3.1	76.8	45.7	Mild
IGIB1040206585	54	1	23.5	1	1	1	1	0	99.8	96	0	1	1	1	0	22	15.9	4680	231000	102	18.3	1	138	5.1	109	0.8	0.3	19.3	12.8	7	4.2	86	10.17	Mild
IGIB1040206601	39	1	21.1	1	0	1	0	0	97.4	98	0	0	0	0	0	18	13	7400	254000	106	20	0.9	138	4	112	0.7	0.4	24.7	22.7	6.9	3.4	67	12.8	Mild
IGIB1040206602	43	1	22.7	1	0	0	0	0	98.1	97	1	0	0	0	0	20	16	7300	180000	91	21.6	0.9	144	3.8	108	0.6	0.2	33.6	48.9	6.5	4.2	45.4	6.78	Mild
IGIB1040206615	55	1	21	1	1	1	0	0	97.3	96	0	1	0	1	0	22	14.8	4900	186000	117	17.5	1.1	143	3.7	107	0.9	0.4	56.7	48.9	6.2	3.1	87.9	34.5	Mild
IGIB1040206617	45	0	24.1	1	1	0	0	0	98.7	97	0	0	0	0	0	15	12.8	12800	283000	385	94.1	1.8	134	4.2	104	0.5	0.2	20.6	18.5	6.5	3.6	82.5	4.5	Mild
IGIB1040206618	50	1	22.5	1	0	0	1	0	99	96	0	1	0	0	1	24	13.8	7600	280000	122	39	0.9	144	5.3	106	0.4	0.2	41.4	21.1	6	3.6	64.3	173.4	Mild
IGIB1040206619	64	1	22	1	0	1	0	0	100	97	0	1	0	1	0	19	18.6	8600	234000	130	22.1	0.8	138	4.6	109	0.4	0.1	24.3	31.7	5.5	3.1	95	13.34	Mild
IGIB1040206632	33	1	23.7	1	1	0	0	0	97.8	98	1	0	0	0	0	20	16.2	3500	99000	106	17.4	1	145	4.5	111	0.3	0.1	36.9	54.9	6.7	3.8	65	9.76	Mild
IGIB1040206637	57	1	23	1	0	0	1	0	98.3	96	0	1	1	1	1	22	14.7	12400	135000	117	37.7	1.1	141	4.9	101	0.6	0.3	113.4	118.7	6.1	3.3	83.8	176.9	Mild
IGIB1040206638	40	1	23.3	1	1	0	0	0	99.2	97	0	0	0	0	0	18	13.9	9400	126000	111	40.2	1.2	144	3.9	109	0.4	0.2	30.9	36.5	5.9	3.7	52.9	50	Mild
IGIB1040206639	77	1	21.2	1	0	0	1	0	98.6	95	0	1	1	1	0	26	14.1	12300	93000	83	64.5	1.6	138	104	111	0.3	0.2	62.8	48.5	4.8	2.7	56.2	103.99	Severe
IGIB1040206641	43	1	22.3	1	0	1	1	0	96.5	96	0	1	0	1	0	24	13.5	16400	450000	190	23.9	0.9	135	4	97	1.1	0.5	53.9	48.7	6.5	3.1	78.7	160.88	Mild
IGIB1040206663	58	1	21.6	1	0	0	1	0	97.8	97	0	1	1	1	0	22	10.3	18100	264000	145	46.8	1.3	140	4.4	110	0.6	0.2	47.7	68.7	6.4	3.2	101.6	27.3	Mild
IGIB1040206666	38	1	23.4	1	0	1	0	0	96	96	0	0	0	0	0	18	12.7	5600	102000	76	33.9	1.1	139	4.4	109	0.5	0.1	74.1	45.1	6.6	3.9	100.2	122.78	Mild
IGIB1040206667	50	1	22.3	1	1	0	0	0	97.3	96	0	1	1	0	0	19	14.8	3400	345000	265	43.6	1.2	143	3.6	107	0.4	0.1	34.8	43.6	6.5	3.2	68.9	84.6	Mild
IGIB1040206687	63	1	22.1	1	1	0	0	0	97.1	97	0	1	0	1	1	20	12.3	5800	226000	74	18.9	0.8	142	3.8	109	0.8	0.2	18.5	18.3	6.7	3.7	61.4	0.5	Mild
IGIB1040206688	24	1	24.6	1	1	1	0	0	98.7	96	0	0	0	0	0	16	14.5	4000	132000	130	13.7	0.8	136	4.4	106	0.5	0.2	55	42	5.5	3.4	51	6.89	Mild
IGIB1040206691	25	1	25.4	1	1	0	0	0	98	98	0	0	0	0	0	16	15	6400	138000	94	28	1.3	139	6	109	0.4	0.2	47.6	72.8	6.8	4.1	51.2	1.89	Mild
IGIB1040206693	37	0	23.5	1	0	1	0	0	99.6	94	0	0	0	0	0	20	15.9	6200	127000	121	47.5	1.3	143	4.8	108	0.5	0.2	81.3	70	5.9	3.8	44.1	58.1	Mild
IGIB1040206712	67	0	24.6	1	1	0	0	0	99.3	97	0	1	1	1	0	18	13.4	4140	188000	96	21.8	1	148	4.1	108	0.3	0.1	22.2	14.8	6.6	3.9	58.5	3.66	Mild
IGIB1040206732	44	1	22.3	1	0	1	1	0	100	96	0	1	0	1	0	24	14.6	6500	224000	145	14.4	0.7	142	4.3	102	0.7	0.3	23.4	21.5	5.7	3	43.6	1.45	Mild
IGIB1040206734	65	0	21.5	1	0	0	1	0	97.3	97	0	1	0	1	1	22	11.2	6700	274000	217	18	0.8	139	5.3	98	0.7	0.4	34.7	27.9	6.4	3.1	65.7	6.78	Mild
IGIB1040206735	35	1	23	1	0	1	1	0	98	95	1	0	0	0	0	20	14.2	2500	205000	99	24.8	0.8	142	4.8	110	0.5	0.2	23.6	21.6	6.8	3.4	56.8	23.6	Mild
IGIB1040206736	55	1	21.3	1	0	1	0	0	98.6	97	1	1	0	1	0	18	15.6	7600	269000	134	34.6	1.1	140	3.6	109	0.7	0.4	43.6	41.1	7.1	3.6	76.8	54.6	Mild
IGIB1040206738	13	0	23.8	1	1	0	0	0	97.6	98	1	0	0	0	0	16	14.1	7500	159000	90	23.6	1.3	138	3.6	104	0.4	0.2	32.4	30.9	6.8	3.1	34.5	3.21	Mild
IGIB1040206740	51	1	21.5	1	1	0	0	0	98.7	96	0	1	1	0	0	18	13.8	7600	280000	122	39	0.9	144	5.3	106	0.4	0.2	41.4	21.1	6	3.6	64.3	1.24	Mild
IGIB1040206742	23	1	22.4	1	1	0	0	0	96.7	98	1	0	0	0	0	15	9.7	9700	283000	92	38.2	1	138	5.2	105	0.4	0.2	38.3	19.3	6.2	3.3	39	0.5	Mild
IGIB1040206750	45	1	22.7	1	1	1	0	0	99.8	97	1	0	0	0	0	18	16.2	13100	223000	144	18.6	1.1	142	4.7	99	0.9	0.3	55.3	68	5.8	3	162.7	12.56	Mild
IGIB1040206757	72	0	21.6	1	0	0	1	0	100	95	0	1	1	1	1	22	9.6	9200	432000	81	72.7	2.4	137	4.6	103	0.4	0.2	34.6	42.1	5.9	3.2	70.1	54.8	Mild
IGIB1040206758	46	0	23.4	1	1	0	0	0	99.8	96	0	0	0	0	0	16	12.3	5600	267000	93	32.1	0.9	140	3.6	112	0.5	0.1	43.5	41.6	6.4	3.1	100.2	2.4	Mild
IGIB1040206762	65	1	24.5	1	1	1	1	0	97.4	96	0	1	0	1	1	20	13.7	3600	195000	157	57.1	1.1	139	6	104	0.5	0.2	35	31	6.9	3.6	66.5	4.9	Mild
IGIB1040206773	25	0	23.5	1	1	0	0	0	98.1	97	1	0	0	0	0	16	14.5	6500	324000	98	34.5	1	140	3.9	110	0.7	0.4	45.6	41.4	5.8	3.1	117	0.5	Mild
IGIB1040206774	47	0	21.1	1	0	0	0	0	97.3	94	0	1	0	1	0	18	13.2	9700	184000	76	21	0.8	136	3.4	98	0.6	0.3	13.4	11.3	5	3.1	132.7	2.12	Mild
IGIB1040206775	62	0	22.7	1	1	0	1	0	98.7	96	0	1	1	1	1	20	10.8	19900	216000	112	48.9	1.2	144	5.8	112	2.7	1.7	42.4	60.5	5.7	3.3	98.2	124	Mild
IGIB1040206776	9	0	21	0	0	0	0	0	99	98	1	0	0	0	0	18	16.5	5800	273000	234	71.5	2.3	134	3.7	101	0.6	0.2	107.9	178	6.2	3.7	45.4	0.5	Mild
IGIB1040206777	32	0	24.1	1	1	0	0	0	100	97	0	0	0	0	0	17	13.4	5600	277000	105	19.9	0.8	138	5	106	0.5	0.4	18.1	17	6.8	3.9	61.8	2.65	Mild
IGIB1040206780	5	1	22.5	0	0	0	0	0	97.8	98	1	0	0	0	0	20	13.4	6500	432000	180	23.1	0.9	140	4	110	0.8	0.5	32	34.8	5.4	3.2	112	0.5	Mild
IGIB1040206781	58	1	22	1	1	0	0	0	98.3	94	0	1	1	1	0	22	14.7	5500	130000	84	26.4	1.2	141	3.8	105	0.8	0.2	52.9	96.8	6.3	3.5	70.1	45.4	Mild
IGIB1040206784	40	1	23.7	1	0	0	1	0	99.2	95	0	0	0	0	0	24	4.5	3600	98000	109	34.6	1.1	133	4.2	104	0.4	0.2	17.3	16.4	5.6	3.8	53.2	0.5	Mild
IGIB1040206785	41	1	23	1	0	1	0	0	98.6	94	0	0	0	0	0	20	12.5	4500	234000	87	30.9	0.9	145	3.8	98	0.8	0.5	56.7	48.9	6.7	3.2	67.9	34.5	Mild
IGIB1040206786	35	0	23.3	1	1	0	0	0	96.5	97	1	0	0	0	0	18	10.3	3400	136000	76	14.1	0.8	144	5.1	109	0.6	0.2	27.3	20.2	6.8	3.4	78.9	2.67	Mild
IGIB1040206804	26	1	24.5	1	1	0	0	0	98.6	96	0	0	0	0	0	18	14.1	12300	93000	83	64.5	1.6	138	104	111	0.3	0.2	62.8	48.5	4.8	2.7	56.2	103.99	Mild
IGIB1040206805	70	0	22.3	1	1	1	0	0	96	98	0	1	0	1	0	20	13.5	16400	450000	190	23.9	0.9	135	4	97	1.1	0.5	53.9	48.7	6.5	3.1	78.7	160.88	Mild
IGIB1040206816	72	1	21.6	0	0	0	0	0	97.3	98	1	1	1	1	0	16	10.3	18100	264000	145	46.8	1.3	140	4.4	110	0.6	0.2	47.7	68.7	6.4	3.2	101.6	27.3	Mild
IGIB1040206820	54	0	23.5	1	1	1	0	0	97.1	96	0	1	1	0	0	18	14.2	11200	250000	245	19.5	0.5	142	4.7	106	0.3	0.1	33.2	37.5	6.5	3.2	132	57.8	Mild
IGIB1040206877	55	1	22.3	1	1	0	0	0	97.8	95	0	1	1	0	1	20	12.3	3800	201000	131	25.9	0.3	142	5.2	105	0.8	0.4	43.2	32.1	5.4	3.2	56.5	16.9	Mild
IGIB1040206878	42	0	23.4	0	0	0	0	0	98.3	97	0	1	0	1	0	16	12.3	5800	226000	74	18.9	0.8	142	3.8	109	0.8	0.2	18.5	18.3	6.7	3.7	61.4	2.4	Mild
IGIB1040207367	42	1	24.6	1	0	1	1	0	98.7	97	1	0	0	0	0	24	14.9	9200	459000	109	109.4	1.4	146	4.7	113	0.4	0.2	46.9	29.3	6.2	3.9	54.2	15.8	Mild
IGIB1040207708	26	1	21	0	0	0	0	0	98.5	100	0	0	0	0	0	18	10.6	24700	280000	204	42.1	0.9	139	4.4	111	0.8	0.2	43.6	34.9	5.8	2.9	69.3	2.4	Mild
IGIB1040207786	28	1	23	1	1	1	0	0	101	99	1	0	0	0	0	22	15.9	4900	197000	93	32.9	1.1	143	4.4	108	0.5	0.2	28.6	44.5	6.5	4.1	73.3	2.79	Mild
IGIB1040207868	19	0	22	0	0	0	0	0	97	98	0	0	0	0	0	20	13.8	5900	73000	104	29.1	1.2	134	4.3	110	1.1	0.5	161.9	68.2	5.8	3.5	84.4	1.67	Mild
IGIB1040207896	38	1	24.1	0	0	0	0	0	96.9	100	0	0	0	0	0	14	13.6	7900	374000	309	29.9	0.9	134	5.3	101	0.8	0.3	43.4	29.7	5.7	3.4	107	0.46	Mild
IGIB1040207980	47	1	21.6	0	0	0	0	0	98	99	0	0	0	0	0	17	16	7300	180000	91	21.6	0.9	144	3.8	108	0.6	0.2	33.6	48.9	6.5	4.2	45.4	0.6	Mild
IGIB1040208021	68	1	25.6	1	1	1	1	0	99.8	98	0	1	0	1	1	24	13.6	8400	537000	134	176	4.7	142	6	110	0.8	0.2	67.8	24.9	6	3.4	76.9	124.9	Severe
IGIB1040208074	29	1	22.1	0	0	0	0	0	97	100	1	0	0	0	0	16	16	7300	180000	91	21.6	0.9	144	3.8	108	0.6	0.2	33.6	48.9	6.5	4.2	45.4	0.5	Mild
IGIB1040208427	52	1	21.2	1	0	1	1	0	100	94	0	1	1	1	1	28	16.4	25200	281000	142	58.4	1	145	4	109	0.6	0.3	53.2	69.4	5.4	3	151	79.8	Severe
IGIB1040208799	42	1	22.3	1	1	1	0	0	100	100	1	1	1	0	0	18	16.5	5800	273000	234	71.5	2.3	134	3.7	101	0.6	0.2	107.9	178	6.2	3.7	45.4	112	Mild
IGIB104020880	83	0	24.6	1	1	0	0	0	102	97	1	1	1	1	1	24	12.3	16800	78000	283	76.8	1.2	156	3.8	123	0.7	0.3	25.8	18.7	7	3.4	53.7	117.7	Mild
IGIB104020900	88	0	18.7	1	1	1	1	0	98.7	99	0	1	1	1	0	28	10.6	24700	280000	204	42.1	0.9	139	4.4	111	0.8	0.2	43.6	34.9	5.8	2.9	69.3	113.8	Severe
IGIB104020901	52	1	23.4	1	0	1	1	0	96.2	98	1	1	1	0	0	20	13.6	7900	374000	309	29.9	0.9	134	5.3	101	0.8	0.3	43.4	29.7	5.7	3.4	107	164.7	Mild
IGIB104020918	60	1	20.4	1	0	1	1	0	97	100	1	1	0	1	0	28	9.7	9700	283000	92	38.2	1	138	5.2	105	0.4	0.2	38.3	19.3	6.2	3.3	39	161.8	Severe
IGIB104020919	40	1	20.1	1	1	1	1	0	97.6	98	0	0	0	0	0	26	13.8	5900	73000	104	29.1	1.2	134	4.3	110	1.1	0.5	161.9	68.2	5.8	3.5	84.4	159.4	Severe
IGIB104020927	75	0	21	1	1	1	1	0	98.6	99	1	1	0	1	0	32	13.1	17800	514000	126	80.2	1.7	131	3.6	97	0.9	0.5	28.5	18.8	6.3	3	139.5	12	Severe
IGIB104020928	82	0	22.3	1	0	0	1	0	97.4	98	1	1	1	0	1	28	10.3	11000	171000	234	165.5	12.5	138	6.5	88	0.5	0.2	107.9	178	6.6	3.8	146.4	49.9	Severe
IGIB104020929	83	1	22.6	1	0	1	1	0	98.4	97	0	1	1	1	1	26	15.3	21900	126000	117	46.7	1.5	143	4.5	98	0.6	0.2	38.6	26.4	5.6	3.2	45.4	75.24	Severe
IGIB104020950	53	1	27.2	1	1	1	1	0	98.9	96	1	1	1	1	0	28	18.2	6700	101000	200	54.1	0.9	136	2.9	97	1.4	0.5	43.8	38.8	6.2	3.7	73.3	127.6	Severe
IGIB104020965	33	1	26	1	1	1	1	0	99.3	98	1	1	1	0	0	28	13.9	6800	156000	151	59.6	1.9	141	4.2	106	0.5	0.2	80.6	42.6	6.6	3.8	57.4	138.15	Severe
IGIB1040209667	70	1	21.4	1	1	0	1	0	98.3	99	0	1	0	0	0	20	14.9	8900	1820000	189	25.2	1.1	137	4.2	106	1.8	0.6	77	27.9	5.9	3.3	60.1	143	Severe
IGIB1040209759	65	0	22.4	1	0	1	1	0	98.9	97	0	1	1	1	0	32	11.2	12000	124000	210	43.2	1.3	132	3.8	110	1.2	0.6	56.2	43.2	5.6	3.4	216	124	Severe
IGIB1040209766	75	1	26.2	1	1	0	1	0	99	95	0	1	0	1	0	28	15.3	5500	191000	149	54.6	1.5	127	6.7	93	0.6	0.3	474.2	157.9	6.6	3.3	320.9	163.15	Severe
